# Supplementary material for: Ticks and Tick-Borne Zoonotic Pathogens From Wild Birds in Northwestern Coastal Spain
Source: Preprints.org preprint supplement (doi:10.20944/preprints202310.0742.v1), 2023-10-12
Supplement: Supplementary file 1 [file supplementary]

## Sheet: All birds and variables
No.	Capture date	Migration	Habitat	Location	Tipe	No.RING	SPECIES	No. TICKS	Tick species	Tick stage	Tick location	Engorgement
1	2021-08-29	Postnuptial	Estuary	Villaviciosa estuary	Capture	4Y65214	Acrocephalus paludicola	0
2	2021-08-29	Postnuptial	Estuary	Villaviciosa estuary	Capture	4Y65215	Acrocephalus paludicola	0
3	2021-08-29	Postnuptial	Estuary	Villaviciosa estuary	Capture	4Y65188	Acrocephalus schoenobaenus	0
4	2021-08-29	Postnuptial	Estuary	Villaviciosa estuary	Capture	4Y65198	Acrocephalus schoenobaenus	0
5	2021-08-29	Postnuptial	Estuary	Villaviciosa estuary	Capture	4Y65202	Acrocephalus schoenobaenus	0
6	2021-08-29	Postnuptial	Estuary	Villaviciosa estuary	Capture	4Y65203	Acrocephalus schoenobaenus	0
7	2021-08-29	Postnuptial	Estuary	Villaviciosa estuary	Capture	4Y65206	Acrocephalus schoenobaenus	0
8	2021-08-29	Postnuptial	Estuary	Villaviciosa estuary	Capture	4Y65209	Acrocephalus schoenobaenus	0
9	2021-08-29	Postnuptial	Estuary	Villaviciosa estuary	Capture	4Y65212	Acrocephalus schoenobaenus	0
10	2021-08-29	Postnuptial	Estuary	Villaviciosa estuary	Capture	4Y65221	Acrocephalus schoenobaenus	0
11	2021-08-29	Postnuptial	Estuary	Villaviciosa estuary	Capture	4Y65222	Acrocephalus schoenobaenus	0
12	2021-08-29	Postnuptial	Estuary	Villaviciosa estuary	Capture	4Y65224	Acrocephalus schoenobaenus	0
13	2021-08-29	Postnuptial	Estuary	Villaviciosa estuary	Capture	4Y65226	Acrocephalus schoenobaenus	0
14	2021-08-29	Postnuptial	Estuary	Villaviciosa estuary	Capture	4Y65189	Acrocephalus scirpaceus	0
15	2021-08-29	Postnuptial	Estuary	Villaviciosa estuary	Capture	4Y65192	Acrocephalus scirpaceus	0
16	2021-08-29	Postnuptial	Estuary	Villaviciosa estuary	Capture	4Y65200	Acrocephalus scirpaceus	0
17	2021-08-29	Postnuptial	Estuary	Villaviciosa estuary	Capture	4Y65201	Acrocephalus scirpaceus	0
18	2021-08-29	Postnuptial	Estuary	Villaviciosa estuary	Capture	4Y65204	Acrocephalus scirpaceus	0
19	2021-08-29	Postnuptial	Estuary	Villaviciosa estuary	Capture	4Y65207	Acrocephalus scirpaceus	0
20	2021-08-29	Postnuptial	Estuary	Villaviciosa estuary	Capture	4Y65210	Acrocephalus scirpaceus	0
21	2021-08-29	Postnuptial	Estuary	Villaviciosa estuary	Capture	4Y65225	Hirundo rustica	0
22	2021-08-29	Postnuptial	Estuary	Villaviciosa estuary	Capture	4Y65194	Locustella naevia	0
23	2021-08-29	Postnuptial	Estuary	Villaviciosa estuary	Capture	4Y65197	Locustella naevia	0
24	2021-08-29	Postnuptial	Estuary	Villaviciosa estuary	Capture	4Y65190	Luscinia svecica	0
25	2021-08-29	Postnuptial	Estuary	Villaviciosa estuary	Capture	4Y65191	Luscinia svecica	0
26	2021-08-29	Postnuptial	Estuary	Villaviciosa estuary	Capture	4Y65193	Luscinia svecica	0
27	2021-08-29	Postnuptial	Estuary	Villaviciosa estuary	Capture	4Y65195	Luscinia svecica	0
28	2021-08-29	Postnuptial	Estuary	Villaviciosa estuary	Capture	4Y65196	Luscinia svecica	0
29	2021-08-29	Postnuptial	Estuary	Villaviciosa estuary	Capture	4Y65208	Luscinia svecica	1	I. ricinus	larvae	eyelid	half feed
30	2021-08-29	Postnuptial	Estuary	Villaviciosa estuary	Capture	4Y65217	Luscinia svecica	1	I. ricinus	larvae	eyelid	half feed
31	2021-08-29	Postnuptial	Estuary	Villaviciosa estuary	Capture	4Y65223	Luscinia svecica	0
32	2021-08-29	Postnuptial	Estuary	Villaviciosa estuary	Capture	4Y65213	Motacilla flava	0
33	2021-08-29	Postnuptial	Estuary	Villaviciosa estuary	Capture	4Y65205	Saxicola rubetra	0
34	2021-08-29	Postnuptial	Estuary	Villaviciosa estuary	Capture	4Y65211	Saxicola rubetra	0
35	2021-08-29	Postnuptial	Estuary	Villaviciosa estuary	Capture	4Y65216	Saxicola rubetra	0
36	2021-08-29	Postnuptial	Estuary	Villaviciosa estuary	Capture	4Y65220	Saxicola rubetra	0
37	2021-08-29	Postnuptial	Estuary	Villaviciosa estuary	Capture	4Y65199	Saxicola rubicola	0
38	2021-08-29	Postnuptial	Estuary	Villaviciosa estuary	Capture	4Y65219	Saxicola rubicola	0
39	2021-08-29	Postnuptial	Estuary	Villaviciosa estuary	Capture	4Y65227	Saxicola rubicola	0
40	2021-08-29	Postnuptial	Estuary	Villaviciosa estuary	Control	4Y02999	Saxicola rubicola	0
41	2021-08-29	Postnuptial	Estuary	Villaviciosa estuary	Capture	2KA14258	Sylvia communis	0
42	2021-08-29	Postnuptial	Estuary	Villaviciosa estuary	Capture	2KA14259	Sylvia communis	0
43	2021-08-29	Postnuptial	Estuary	Villaviciosa estuary	Capture	2KA14260	Sylvia communis	0
44	2021-08-29	Postnuptial	Estuary	Villaviciosa estuary	Capture	4Y65218	Sylvia melanocephala	0
45	2021-09-05	Postnuptial	Estuary	Villaviciosa estuary	Capture	4Y65249	Acrocephalus schoenobaenus	0
46	2021-09-05	Postnuptial	Estuary	Villaviciosa estuary	Capture	4Y65251	Acrocephalus schoenobaenus	0
47	2021-09-05	Postnuptial	Estuary	Villaviciosa estuary	Capture	4Y65252	Acrocephalus schoenobaenus	0
48	2021-09-05	Postnuptial	Estuary	Villaviciosa estuary	Capture	4Y65253	Acrocephalus schoenobaenus	0
49	2021-09-05	Postnuptial	Estuary	Villaviciosa estuary	Capture	4Y65258	Acrocephalus schoenobaenus	0
50	2021-09-05	Postnuptial	Estuary	Villaviciosa estuary	Control	4Y65221	Acrocephalus schoenobaenus	0
51	2021-09-05	Postnuptial	Estuary	Villaviciosa estuary	Capture	4Y65257	Acrocephalus scirpaceus	0
52	2021-09-05	Postnuptial	Estuary	Villaviciosa estuary	Capture	4Y65256	Anthus trivialis	0
53	2021-09-05	Postnuptial	Estuary	Villaviciosa estuary	Capture	LA00249	Jynx torquilla	0
54	2021-09-05	Postnuptial	Estuary	Villaviciosa estuary	Capture	LA00250	Jynx torquilla	0
55	2021-09-05	Postnuptial	Estuary	Villaviciosa estuary	Capture	4Y65250	Luscinia svecica	0
56	2021-09-05	Postnuptial	Estuary	Villaviciosa estuary	Control	4Y65191	Luscinia svecica	0
57	2021-09-05	Postnuptial	Estuary	Villaviciosa estuary	Control	4Y65173	Luscinia svecica	0
58	2021-09-05	Postnuptial	Estuary	Villaviciosa estuary	Capture	1Z99364	Phylloscopus collybita	0
59	2021-09-05	Postnuptial	Estuary	Villaviciosa estuary	Capture	1Z99363	Phylloscopus ibericus	0
60	2021-09-05	Postnuptial	Estuary	Villaviciosa estuary	Capture	1Z99362	Phylloscopus trochilus	0
61	2021-09-05	Postnuptial	Estuary	Villaviciosa estuary	Capture	1Z99365	Phylloscopus trochilus	0
62	2021-09-05	Postnuptial	Estuary	Villaviciosa estuary	Capture	4Y65254	Saxicola rubetra	0
63	2021-09-05	Postnuptial	Estuary	Villaviciosa estuary	Control	4Y65216	Saxicola rubetra	0
64	2021-09-05	Postnuptial	Estuary	Villaviciosa estuary	Capture	4Y65255	Saxicola rubicola	0
65	2021-09-05	Postnuptial	Estuary	Villaviciosa estuary	Capture	2KA14274	Sylvia communis	0
66	2021-09-05	Postnuptial	Estuary	Villaviciosa estuary	Capture	2KA14275	Sylvia communis	0
67	2021-09-05	Postnuptial	Estuary	Villaviciosa estuary	Capture	B99937	Turdus merula	1	I. frontalis	nymph	n.a.	fully feed
68	2021-09-12	Postnuptial	Estuary	Villaviciosa estuary	Capture	4Y65279	Acrocephalus schoenobaenus	0
69	2021-09-12	Postnuptial	Estuary	Villaviciosa estuary	Capture	4Y65281	Acrocephalus schoenobaenus	0
70	2021-09-12	Postnuptial	Estuary	Villaviciosa estuary	Capture	4Y65282	Acrocephalus schoenobaenus	0
71	2021-09-12	Postnuptial	Estuary	Villaviciosa estuary	Capture	4Y65283	Acrocephalus schoenobaenus	0
72	2021-09-12	Postnuptial	Estuary	Villaviciosa estuary	Capture	4Y65284	Acrocephalus schoenobaenus	0
73	2021-09-12	Postnuptial	Estuary	Villaviciosa estuary	Capture	4Y65286	Acrocephalus schoenobaenus	0
74	2021-09-12	Postnuptial	Estuary	Villaviciosa estuary	Capture	4Y65280	Luscinia svecica	0
75	2021-09-12	Postnuptial	Estuary	Villaviciosa estuary	Capture	4Y65285	Luscinia svecica	0
76	2021-09-12	Postnuptial	Estuary	Villaviciosa estuary	Capture	1Z99372	Phylloscopus trochilus	0
77	2021-09-12	Postnuptial	Estuary	Villaviciosa estuary	Capture	2KA14288	Sylvia communis	0
78	2021-09-12	Postnuptial	Estuary	Villaviciosa estuary	Control	2KA14274	Sylvia communis	0
79	2021-09-19	Postnuptial	Estuary	Villaviciosa estuary	Capture	4Y65401	Acrocephalus schoenobaenus	0
80	2021-09-19	Postnuptial	Estuary	Villaviciosa estuary	Capture	4Y65402	Acrocephalus schoenobaenus	0
81	2021-09-19	Postnuptial	Estuary	Villaviciosa estuary	Capture	4Y65403	Acrocephalus schoenobaenus	0
82	2021-09-19	Postnuptial	Estuary	Villaviciosa estuary	Capture	4Y65405	Acrocephalus schoenobaenus	0
83	2021-09-19	Postnuptial	Estuary	Villaviciosa estuary	Control	4Y65279	Acrocephalus schoenobaenus	0
84	2021-09-19	Postnuptial	Estuary	Villaviciosa estuary	Capture	4Y65404	Acrocephalus scirpaceus	0
85	2021-09-19	Postnuptial	Estuary	Villaviciosa estuary	Capture	4Y65407	Hirundo rustica	0
86	2021-09-19	Postnuptial	Estuary	Villaviciosa estuary	Capture	4Y65406	Luscinia svecica	0
87	2021-09-19	Postnuptial	Estuary	Villaviciosa estuary	Recovery	8998785	Luscinia svecica	0
88	2021-09-19	Postnuptial	Estuary	Villaviciosa estuary	Capture	1Z99374	Phylloscopus trochilus	0
89	2021-09-19	Postnuptial	Estuary	Villaviciosa estuary	Capture	1Z99375	Phylloscopus trochilus	0
90	2021-09-19	Postnuptial	Estuary	Villaviciosa estuary	Capture	2KA14291	Sylvia communis	0
91	2021-09-26	Postnuptial	Estuary	Villaviciosa estuary	Capture	4Y65426	Acrocephalus schoenobaenus	0
92	2021-09-26	Postnuptial	Estuary	Villaviciosa estuary	Capture	4Y65423	Acrocephalus scirpaceus	0
93	2021-09-26	Postnuptial	Estuary	Villaviciosa estuary	Capture	4Y65428	Acrocephalus scirpaceus	0
94	2021-09-26	Postnuptial	Estuary	Villaviciosa estuary	Capture	4Y65429	Acrocephalus scirpaceus	0
95	2021-09-26	Postnuptial	Estuary	Villaviciosa estuary	Capture	4Y65425	Cettia cetti	0
96	2021-09-26	Postnuptial	Estuary	Villaviciosa estuary	Capture	1Z99381	Cisticola juncidis	0
97	2021-09-26	Postnuptial	Estuary	Villaviciosa estuary	Capture		Erithacus rubecula	0
98	2021-09-26	Postnuptial	Estuary	Villaviciosa estuary	Capture	4Y65422	Saxicola rubetra	0
99	2021-09-26	Postnuptial	Estuary	Villaviciosa estuary	Capture	4Y65424	Saxicola rubetra	0
100	2021-09-26	Postnuptial	Estuary	Villaviciosa estuary	Capture	4Y65427	Saxicola rubicola	0
101	2021-09-26	Postnuptial	Estuary	Villaviciosa estuary	Capture	2KA14299	Sylvia atricapilla	0
102	2021-09-26	Postnuptial	Estuary	Villaviciosa estuary	Capture	2KA14300	Sylvia atricapilla	0
103	2021-10-09	Postnuptial	Estuary	Villaviciosa estuary	Capture	4Y65451	Acrocephalus scirpaceus	0
104	2021-10-09	Postnuptial	Estuary	Villaviciosa estuary	Capture	4Y65453	Acrocephalus scirpaceus	0
105	2021-10-09	Postnuptial	Estuary	Villaviciosa estuary	Capture	4Y65460	Acrocephalus scirpaceus	0
106	2021-10-09	Postnuptial	Estuary	Villaviciosa estuary	Capture	4Y65454	Anthus pratensis	0
107	2021-10-09	Postnuptial	Estuary	Villaviciosa estuary	Capture	4Y65455	Anthus pratensis	0
108	2021-10-09	Postnuptial	Estuary	Villaviciosa estuary	Capture	4Y65458	Anthus pratensis	0
109	2021-10-09	Postnuptial	Estuary	Villaviciosa estuary	Capture	4Y65459	Anthus pratensis	0
110	2021-10-09	Postnuptial	Estuary	Villaviciosa estuary	Capture	4Y65461	Anthus pratensis	0
111	2021-10-09	Postnuptial	Estuary	Villaviciosa estuary	Capture	4Y65462	Anthus pratensis	0
112	2021-10-09	Postnuptial	Estuary	Villaviciosa estuary	Capture	4Y65463	Anthus pratensis	0
113	2021-10-09	Postnuptial	Estuary	Villaviciosa estuary	Capture	4Y65464	Anthus pratensis	0
114	2021-10-09	Postnuptial	Estuary	Villaviciosa estuary	Capture	4Y65465	Anthus pratensis	0
115	2021-10-09	Postnuptial	Estuary	Villaviciosa estuary	Capture	4Y65466	Anthus pratensis	0
116	2021-10-09	Postnuptial	Estuary	Villaviciosa estuary	Capture	4Y65467	Anthus pratensis	0
117	2021-10-09	Postnuptial	Estuary	Villaviciosa estuary	Capture	4Y65468	Anthus pratensis	0
118	2021-10-09	Postnuptial	Estuary	Villaviciosa estuary	Capture	4Y65469	Anthus pratensis	0
119	2021-10-09	Postnuptial	Estuary	Villaviciosa estuary	Capture	4Y65472	Anthus pratensis	0
120	2021-10-09	Postnuptial	Estuary	Villaviciosa estuary	Capture	4Y65473	Anthus pratensis	0
121	2021-10-09	Postnuptial	Estuary	Villaviciosa estuary	Capture	4Y65474	Anthus pratensis	0
122	2021-10-09	Postnuptial	Estuary	Villaviciosa estuary	Capture	4Y65476	Anthus pratensis	1	I. ricinus	larvae	n.a.	half feed
123	2021-10-09	Postnuptial	Estuary	Villaviciosa estuary	Capture	4Y65477	Anthus pratensis	0
124	2021-10-09	Postnuptial	Estuary	Villaviciosa estuary	Capture	4Y65478	Anthus pratensis	0
125	2021-10-09	Postnuptial	Estuary	Villaviciosa estuary	Capture	4Y65486	Anthus pratensis	0
126	2021-10-09	Postnuptial	Estuary	Villaviciosa estuary	Capture	4Y65487	Anthus pratensis	0
127	2021-10-09	Postnuptial	Estuary	Villaviciosa estuary	Capture	4Y65480	Anthus spinoletta	0
128	2021-10-09	Postnuptial	Estuary	Villaviciosa estuary	Capture	4Y65484	Anthus spinoletta	0
129	2021-10-09	Postnuptial	Estuary	Villaviciosa estuary	Capture	1Z99386	Cisticola juncidis	0
130	2021-10-09	Postnuptial	Estuary	Villaviciosa estuary	Capture	4Y65452	Erithacus rubecula	0
131	2021-10-09	Postnuptial	Estuary	Villaviciosa estuary	Capture	4Y65471	Erithacus rubecula	0
132	2021-10-09	Postnuptial	Estuary	Villaviciosa estuary	Capture	4Y65475	Erithacus rubecula	0
133	2021-10-09	Postnuptial	Estuary	Villaviciosa estuary	Capture	4Y65482	Erithacus rubecula	2	I. frontalis	larvaes2	n.a.	fully feed
134	2021-10-09	Postnuptial	Estuary	Villaviciosa estuary	Capture	4Y65483	Erithacus rubecula	0
135	2021-10-09	Postnuptial	Estuary	Villaviciosa estuary	Capture	4Y65485	Erithacus rubecula	1	I. ricinus	nymph	n.a.	fully feed
136	2021-10-09	Postnuptial	Estuary	Villaviciosa estuary	Capture	4Y65456	Motacilla alba	0
137	2021-10-09	Postnuptial	Estuary	Villaviciosa estuary	Capture	4Y65470	Motacilla alba	0
138	2021-10-09	Postnuptial	Estuary	Villaviciosa estuary	Capture	1Z99385	Phylloscopus collybita	0
139	2021-10-09	Postnuptial	Estuary	Villaviciosa estuary	Capture	4Y65457	Saxicola rubicola	0
140	2021-10-09	Postnuptial	Estuary	Villaviciosa estuary	Capture	4Y65481	Saxicola rubicola	0
141	2021-10-09	Postnuptial	Estuary	Villaviciosa estuary	Capture	3KA71627	Sylvia atricapilla	0
142	2021-10-09	Postnuptial	Estuary	Villaviciosa estuary	Capture	4Y65479	Sylvia melanocephala	0
143	2021-10-09	Postnuptial	Estuary	Villaviciosa estuary	Capture	L36944	Turdus philomelos	0
144	2021-10-15	Postnuptial	Forest	Nava (Fuensanta)	Capture	W09752	Alcedo atthis	0
145	2021-10-15	Postnuptial	Forest	Nava (Fuensanta)	Capture	1Z99387	Certhia brachydactyla	0
146	2021-10-15	Postnuptial	Forest	Nava (Fuensanta)	Capture	4Y65489	Lophophanes cristatus	0
147	2021-10-15	Postnuptial	Forest	Nava (Fuensanta)	Capture	3KA71628	Parus major	0
148	2021-10-15	Postnuptial	Forest	Nava (Fuensanta)	Capture	4Y65488	Poecile palustris	0
149	2021-10-17	Postnuptial	Estuary	Villaviciosa estuary	Capture	4Y65490	Acrocephalus scirpaceus	1	I. ricinus	larvae	n.a.	fully feed
150	2021-10-17	Postnuptial	Estuary	Villaviciosa estuary	Capture	4Y65491	Anthus pratensis	0
151	2021-10-17	Postnuptial	Estuary	Villaviciosa estuary	Capture	4Y65493	Anthus pratensis	0
152	2021-10-17	Postnuptial	Estuary	Villaviciosa estuary	Capture	4Y65495	Anthus pratensis	0
153	2021-10-17	Postnuptial	Estuary	Villaviciosa estuary	Capture	4Y65499	Anthus pratensis	0
154	2021-10-17	Postnuptial	Estuary	Villaviciosa estuary	Capture	4Y65500	Anthus pratensis	0
155	2021-10-17	Postnuptial	Estuary	Villaviciosa estuary	Capture	4Y65302	Anthus pratensis	1	I. ricinus	larvae	n.a.	fully feed
156	2021-10-17	Postnuptial	Estuary	Villaviciosa estuary	Capture	4Y65303	Anthus pratensis	0
157	2021-10-17	Postnuptial	Estuary	Villaviciosa estuary	Capture	4Y65309	Anthus pratensis	0
158	2021-10-17	Postnuptial	Estuary	Villaviciosa estuary	Capture	4Y65310	Anthus pratensis	0
159	2021-10-17	Postnuptial	Estuary	Villaviciosa estuary	Capture	4Y65314	Anthus pratensis	0
160	2021-10-17	Postnuptial	Estuary	Villaviciosa estuary	Capture	4Y65315	Anthus pratensis	0
161	2021-10-17	Postnuptial	Estuary	Villaviciosa estuary	Capture	4Y65316	Anthus pratensis	0
162	2021-10-17	Postnuptial	Estuary	Villaviciosa estuary	Capture	4Y65317	Anthus pratensis	0
163	2021-10-17	Postnuptial	Estuary	Villaviciosa estuary	Capture	4Y65318	Anthus pratensis	0
164	2021-10-17	Postnuptial	Estuary	Villaviciosa estuary	Capture	4Y65319	Anthus pratensis	0
165	2021-10-17	Postnuptial	Estuary	Villaviciosa estuary	Capture	4Y65320	Anthus pratensis	0
166	2021-10-17	Postnuptial	Estuary	Villaviciosa estuary	Capture	4Y65322	Anthus pratensis	0
167	2021-10-17	Postnuptial	Estuary	Villaviciosa estuary	Capture	4Y65323	Anthus pratensis	0
168	2021-10-17	Postnuptial	Estuary	Villaviciosa estuary	Capture	4Y65497	Anthus spinoletta	0
169	2021-10-17	Postnuptial	Estuary	Villaviciosa estuary	Capture	4Y65306	Anthus spinoletta	0
170	2021-10-17	Postnuptial	Estuary	Villaviciosa estuary	Capture	4Y65313	Anthus spinoletta	1	I. frontalis	larvae	eyelid	little feed
171	2021-10-17	Postnuptial	Estuary	Villaviciosa estuary	Capture	1Z99390	Cisticola juncidis	0
172	2021-10-17	Postnuptial	Estuary	Villaviciosa estuary	Capture	4Y65496	Emberiza schoeniclus	0
173	2021-10-17	Postnuptial	Estuary	Villaviciosa estuary	Capture	4Y65304	Emberiza schoeniclus	0
174	2021-10-17	Postnuptial	Estuary	Villaviciosa estuary	Capture	4Y65492	Erithacus rubecula	0
175	2021-10-17	Postnuptial	Estuary	Villaviciosa estuary	Capture	4Y65494	Erithacus rubecula	0
176	2021-10-17	Postnuptial	Estuary	Villaviciosa estuary	Capture	4Y65498	Erithacus rubecula	0
177	2021-10-17	Postnuptial	Estuary	Villaviciosa estuary	Capture	4Y65305	Erithacus rubecula	0
178	2021-10-17	Postnuptial	Estuary	Villaviciosa estuary	Capture	4Y65311	Erithacus rubecula	0
179	2021-10-17	Postnuptial	Estuary	Villaviciosa estuary	Capture		Erithacus rubecula	0
180	2021-10-17	Postnuptial	Estuary	Villaviciosa estuary	Capture	3KA71629	Parus major	0
181	2021-10-17	Postnuptial	Estuary	Villaviciosa estuary	Capture	1Z99388	Phylloscopus collybita	0
182	2021-10-17	Postnuptial	Estuary	Villaviciosa estuary	Capture	1Z99389	Phylloscopus collybita	0
183	2021-10-17	Postnuptial	Estuary	Villaviciosa estuary	Capture	1Z99391	Phylloscopus collybita	0
184	2021-10-17	Postnuptial	Estuary	Villaviciosa estuary	Capture	4Y65307	Saxicola rubetra	0
185	2021-10-17	Postnuptial	Estuary	Villaviciosa estuary	Capture	4Y65301	Saxicola rubicola	0
186	2021-10-17	Postnuptial	Estuary	Villaviciosa estuary	Capture	4Y65308	Saxicola rubicola	0
187	2021-10-17	Postnuptial	Estuary	Villaviciosa estuary	Capture	4Y65312	Saxicola rubicola	0
188	2021-10-17	Postnuptial	Estuary	Villaviciosa estuary	Capture	4Y65321	Saxicola rubicola	0
189	2021-10-17	Postnuptial	Estuary	Villaviciosa estuary	ReCapture	3Y73833	Saxicola rubicola	0
190	2021-10-17	Postnuptial	Estuary	Villaviciosa estuary	Capture	3KA71630	Sylvia atricapilla	0
191	2021-11-07	Wintering estuary	Estuary	Nalón estuary	Capture	4Y65341	Anthus pratensis	0
192	2021-11-07	Wintering estuary	Estuary	Nalón estuary	Control	4Y65293	Cettia cetti	0
193	2021-11-07	Wintering estuary	Estuary	Nalón estuary	Control	4Y65058	Cettia cetti	0
194	2021-11-07	Wintering estuary	Estuary	Nalón estuary	Capture	3KA71631	Chloris chloris	0
195	2021-11-07	Wintering estuary	Estuary	Nalón estuary	Capture	3KA71633	Chloris chloris	0
196	2021-11-07	Wintering estuary	Estuary	Nalón estuary	Capture	3Z00914	Cisticola juncidis	0
197	2021-11-07	Wintering estuary	Estuary	Nalón estuary	Capture	4Y65324	Emberiza schoeniclus	0
198	2021-11-07	Wintering estuary	Estuary	Nalón estuary	Capture	4Y65325	Emberiza schoeniclus	0
199	2021-11-07	Wintering estuary	Estuary	Nalón estuary	Capture	4Y65326	Emberiza schoeniclus	0
200	2021-11-07	Wintering estuary	Estuary	Nalón estuary	Capture	4Y65327	Emberiza schoeniclus	0
201	2021-11-07	Wintering estuary	Estuary	Nalón estuary	Capture	4Y65328	Emberiza schoeniclus	0
202	2021-11-07	Wintering estuary	Estuary	Nalón estuary	Capture	4Y65329	Emberiza schoeniclus	0
203	2021-11-07	Wintering estuary	Estuary	Nalón estuary	Capture	4Y65330	Emberiza schoeniclus	0
204	2021-11-07	Wintering estuary	Estuary	Nalón estuary	Capture	4Y65331	Emberiza schoeniclus	0
205	2021-11-07	Wintering estuary	Estuary	Nalón estuary	Capture	4Y65332	Emberiza schoeniclus	0
206	2021-11-07	Wintering estuary	Estuary	Nalón estuary	Capture	4Y65333	Emberiza schoeniclus	0
207	2021-11-07	Wintering estuary	Estuary	Nalón estuary	Capture	4Y65334	Emberiza schoeniclus	0
208	2021-11-07	Wintering estuary	Estuary	Nalón estuary	Capture	4Y65335	Emberiza schoeniclus	0
209	2021-11-07	Wintering estuary	Estuary	Nalón estuary	Capture	4Y65336	Emberiza schoeniclus	0
210	2021-11-07	Wintering estuary	Estuary	Nalón estuary	Capture	4Y65337	Emberiza schoeniclus	0
211	2021-11-07	Wintering estuary	Estuary	Nalón estuary	Capture	4Y65338	Emberiza schoeniclus	0
212	2021-11-07	Wintering estuary	Estuary	Nalón estuary	Capture	4Y65340	Emberiza schoeniclus	0
213	2021-11-07	Wintering estuary	Estuary	Nalón estuary	Capture	4Y65342	Emberiza schoeniclus	0
214	2021-11-07	Wintering estuary	Estuary	Nalón estuary	ReCapture	4Y02860	Emberiza schoeniclus	0
215	2021-11-07	Wintering estuary	Estuary	Nalón estuary	Capture	4Y65339	Erithacus rubecula	0
216	2021-11-07	Wintering estuary	Estuary	Nalón estuary	ReCapture	2Y48337	Erithacus rubecula	0
217	2021-11-07	Wintering estuary	Estuary	Nalón estuary	Capture	1Z99392	Phylloscopus collybita	0
218	2021-11-07	Wintering estuary	Estuary	Nalón estuary	Capture	1Z99393	Phylloscopus collybita	0
219	2021-11-07	Wintering estuary	Estuary	Nalón estuary	Capture	1Z99395	Phylloscopus collybita	0
220	2021-11-07	Wintering estuary	Estuary	Nalón estuary	Capture	1Z99396	Phylloscopus collybita	0
221	2021-11-07	Wintering estuary	Estuary	Nalón estuary	Capture	1Z99397	Phylloscopus collybita	0
222	2021-11-07	Wintering estuary	Estuary	Nalón estuary	Capture	1Z99398	Phylloscopus collybita	0
223	2021-11-07	Wintering estuary	Estuary	Nalón estuary	Capture	1Z99399	Phylloscopus collybita	0
224	2021-11-07	Wintering estuary	Estuary	Nalón estuary	Capture	1Z99400	Phylloscopus collybita	0
225	2021-11-07	Wintering estuary	Estuary	Nalón estuary	Capture	3Z00901	Phylloscopus collybita	0
226	2021-11-07	Wintering estuary	Estuary	Nalón estuary	Capture	3Z00903	Phylloscopus collybita	0
227	2021-11-07	Wintering estuary	Estuary	Nalón estuary	Capture	3Z00904	Phylloscopus collybita	0
228	2021-11-07	Wintering estuary	Estuary	Nalón estuary	Capture	3Z00905	Phylloscopus collybita	0
229	2021-11-07	Wintering estuary	Estuary	Nalón estuary	Capture	3Z00906	Phylloscopus collybita	0
230	2021-11-07	Wintering estuary	Estuary	Nalón estuary	Capture	3Z00907	Phylloscopus collybita	0
231	2021-11-07	Wintering estuary	Estuary	Nalón estuary	Capture	3Z00908	Phylloscopus collybita	0
232	2021-11-07	Wintering estuary	Estuary	Nalón estuary	Capture	3Z00909	Phylloscopus collybita	0
233	2021-11-07	Wintering estuary	Estuary	Nalón estuary	Capture	3Z00910	Phylloscopus collybita	1	I. frontalis	larvae	eyelid	fully feed
234	2021-11-07	Wintering estuary	Estuary	Nalón estuary	Capture	3Z00911	Phylloscopus collybita	0
235	2021-11-07	Wintering estuary	Estuary	Nalón estuary	Capture	3Z00913	Phylloscopus collybita	0
236	2021-11-07	Wintering estuary	Estuary	Nalón estuary	Capture	3Z00915	Phylloscopus collybita	0
237	2021-11-07	Wintering estuary	Estuary	Nalón estuary	Capture	3Z00916	Phylloscopus collybita	0
238	2021-11-07	Wintering estuary	Estuary	Nalón estuary	Capture	3Z00917	Phylloscopus collybita	0
239	2021-11-07	Wintering estuary	Estuary	Nalón estuary	Capture	3Z00902	Phylloscopus collybita tristis	0
240	2021-11-07	Wintering estuary	Estuary	Nalón estuary	Control	4Y65064	Saxicola rubicola	0
241	2021-11-07	Wintering estuary	Estuary	Nalón estuary	Control	4Y02878	Saxicola rubicola	0
242	2021-11-07	Wintering estuary	Estuary	Nalón estuary	Capture	1Z99394	Serinus serinus	0
243	2021-11-07	Wintering estuary	Estuary	Nalón estuary	Capture	3KA71632	Sylvia atricapilla	0
244	2021-11-07	Wintering estuary	Estuary	Nalón estuary	Capture	3Z00912	Troglodytes troglodytes	0
245	2021-11-07	Wintering estuary	Estuary	Nalón estuary	Control	1Z99334	Troglodytes troglodytes	0
246	2021-11-14	Wintering estuary	Estuary	Villaviciosa estuary	Capture	4Y65344	Acrocephalus scirpaceus	0
247	2021-11-14	Wintering estuary	Estuary	Villaviciosa estuary	Capture	3Z00922	Aegithalos caudatus	0
248	2021-11-14	Wintering estuary	Estuary	Villaviciosa estuary	Capture	4Y65345	Anthus pratensis	0
249	2021-11-14	Wintering estuary	Estuary	Villaviciosa estuary	Capture	4Y65346	Anthus pratensis	0
250	2021-11-14	Wintering estuary	Estuary	Villaviciosa estuary	Capture	4Y65349	Anthus pratensis	0
251	2021-11-14	Wintering estuary	Estuary	Villaviciosa estuary	Capture	4Y65350	Anthus pratensis	0
252	2021-11-14	Wintering estuary	Estuary	Villaviciosa estuary	Capture	4Y65351	Anthus pratensis	0
253	2021-11-14	Wintering estuary	Estuary	Villaviciosa estuary	Capture	4Y65352	Anthus pratensis	1	I. ricinus	larvae	eyelid	little feed
254	2021-11-14	Wintering estuary	Estuary	Villaviciosa estuary	Capture	4Y65354	Anthus pratensis	0
255	2021-11-14	Wintering estuary	Estuary	Villaviciosa estuary	Capture	4Y65356	Anthus pratensis	0
256	2021-11-14	Wintering estuary	Estuary	Villaviciosa estuary	Capture	4Y65358	Anthus pratensis	0
257	2021-11-14	Wintering estuary	Estuary	Villaviciosa estuary	Capture	4Y65359	Anthus pratensis	0
258	2021-11-14	Wintering estuary	Estuary	Villaviciosa estuary	Capture	4Y65360	Anthus pratensis	0
259	2021-11-14	Wintering estuary	Estuary	Villaviciosa estuary	Capture	4Y65361	Anthus pratensis	0
260	2021-11-14	Wintering estuary	Estuary	Villaviciosa estuary	Capture	4Y65364	Anthus pratensis	0
261	2021-11-14	Wintering estuary	Estuary	Villaviciosa estuary	Capture	4Y65347	Anthus spinoletta	0
262	2021-11-14	Wintering estuary	Estuary	Villaviciosa estuary	Capture	4Y65353	Anthus spinoletta	0
263	2021-11-14	Wintering estuary	Estuary	Villaviciosa estuary	Capture	4Y65355	Anthus spinoletta	0
264	2021-11-14	Wintering estuary	Estuary	Villaviciosa estuary	Capture	4Y65348	Cettia cetti	0
265	2021-11-14	Wintering estuary	Estuary	Villaviciosa estuary	Capture	3KA71640	Chloris chloris	0
266	2021-11-14	Wintering estuary	Estuary	Villaviciosa estuary	Capture	4Y65362	Emberiza schoeniclus	0
267	2021-11-14	Wintering estuary	Estuary	Villaviciosa estuary	Capture	4Y65343	Erithacus rubecula	0
268	2021-11-14	Wintering estuary	Estuary	Villaviciosa estuary	Control	4Y65452	Erithacus rubecula	0
269	2021-11-14	Wintering estuary	Estuary	Villaviciosa estuary	Capture	3KA71635	Fringilla coelebs	0
270	2021-11-14	Wintering estuary	Estuary	Villaviciosa estuary	Capture	3KA71636	Fringilla coelebs	0
271	2021-11-14	Wintering estuary	Estuary	Villaviciosa estuary	Capture	3KA71637	Fringilla coelebs	0
272	2021-11-14	Wintering estuary	Estuary	Villaviciosa estuary	Capture	3KA71641	Fringilla coelebs	0
273	2021-11-14	Wintering estuary	Estuary	Villaviciosa estuary	Capture	3KA71642	Fringilla coelebs	0
274	2021-11-14	Wintering estuary	Estuary	Villaviciosa estuary	Capture	3KA71634	Passer domesticus	0
275	2021-11-14	Wintering estuary	Estuary	Villaviciosa estuary	Capture	3Z00918	Phylloscopus collybita	0
276	2021-11-14	Wintering estuary	Estuary	Villaviciosa estuary	Capture	3Z00919	Phylloscopus collybita	0
277	2021-11-14	Wintering estuary	Estuary	Villaviciosa estuary	Capture	3Z00920	Phylloscopus collybita	0
278	2021-11-14	Wintering estuary	Estuary	Villaviciosa estuary	Capture	3Z00921	Phylloscopus collybita	0
279	2021-11-14	Wintering estuary	Estuary	Villaviciosa estuary	Capture	3Z00923	Phylloscopus collybita	0
280	2021-11-14	Wintering estuary	Estuary	Villaviciosa estuary	Capture	3Z00924	Phylloscopus collybita	0
281	2021-11-14	Wintering estuary	Estuary	Villaviciosa estuary	Control	4Y65172	Saxicola rubicola	0
282	2021-11-14	Wintering estuary	Estuary	Villaviciosa estuary	ReCapture	4Y02606	Saxicola rubicola	0
283	2021-11-14	Wintering estuary	Estuary	Villaviciosa estuary	Capture	3KA71638	Sylvia atricapilla	0
284	2021-11-14	Wintering estuary	Estuary	Villaviciosa estuary	Capture	3KA71639	Sylvia atricapilla	0
285	2021-11-14	Wintering estuary	Estuary	Villaviciosa estuary	Capture	4Y65357	Sylvia melanocephala	0
286	2021-11-14	Wintering estuary	Estuary	Villaviciosa estuary	Capture	4Y65363	Sylvia melanocephala	0
287	2021-11-14	Wintering estuary	Estuary	Villaviciosa estuary	Control	4Y65479	Sylvia melanocephala	0
288	2021-11-14	Wintering estuary	Estuary	Villaviciosa estuary	Capture	L36945	Turdus philomelos	0
289	2021-11-21	Wintering estuary	Estuary	Nalón estuary	Capture	4Y65365	Anthus pratensis	0
290	2021-11-21	Wintering estuary	Estuary	Nalón estuary	Control	4Y65293	Cettia cetti	0
291	2021-11-21	Wintering estuary	Estuary	Nalón estuary	Control	4Y65297	Cettia cetti	0
292	2021-11-21	Wintering estuary	Estuary	Nalón estuary	Control	4Y65418	Cettia cetti	0
293	2021-11-21	Wintering estuary	Estuary	Nalón estuary	Control	4Y65058	Cettia cetti	0
294	2021-11-21	Wintering estuary	Estuary	Nalón estuary	Capture	4Y65389	Cyanistes caeruleus	0
295	2021-11-21	Wintering estuary	Estuary	Nalón estuary	Capture	3Y04403	Cyanistes caeruleus	0
296	2021-11-21	Wintering estuary	Estuary	Nalón estuary	not available	4Y65737	Emberiza schoeniclus	0
297	2021-11-21	Wintering estuary	Estuary	Nalón estuary	Capture	4Y65367	Emberiza schoeniclus	0
298	2021-11-21	Wintering estuary	Estuary	Nalón estuary	Capture	4Y65368	Emberiza schoeniclus	0
299	2021-11-21	Wintering estuary	Estuary	Nalón estuary	Capture	4Y65369	Emberiza schoeniclus	0
300	2021-11-21	Wintering estuary	Estuary	Nalón estuary	Capture	4Y65370	Emberiza schoeniclus	0
301	2021-11-21	Wintering estuary	Estuary	Nalón estuary	Capture	4Y65371	Emberiza schoeniclus	0
302	2021-11-21	Wintering estuary	Estuary	Nalón estuary	Capture	4Y65372	Emberiza schoeniclus	0
303	2021-11-21	Wintering estuary	Estuary	Nalón estuary	Capture	4Y65373	Emberiza schoeniclus	0
304	2021-11-21	Wintering estuary	Estuary	Nalón estuary	Capture	4Y65374	Emberiza schoeniclus	0
305	2021-11-21	Wintering estuary	Estuary	Nalón estuary	Capture	4Y65375	Emberiza schoeniclus	0
306	2021-11-21	Wintering estuary	Estuary	Nalón estuary	Capture	4Y65376	Emberiza schoeniclus	0
307	2021-11-21	Wintering estuary	Estuary	Nalón estuary	Capture	4Y65377	Emberiza schoeniclus	0
308	2021-11-21	Wintering estuary	Estuary	Nalón estuary	Capture	4Y65378	Emberiza schoeniclus	0
309	2021-11-21	Wintering estuary	Estuary	Nalón estuary	Capture	4Y65379	Emberiza schoeniclus	0
310	2021-11-21	Wintering estuary	Estuary	Nalón estuary	Capture	4Y65380	Emberiza schoeniclus	0
311	2021-11-21	Wintering estuary	Estuary	Nalón estuary	Capture	4Y65381	Emberiza schoeniclus	0
312	2021-11-21	Wintering estuary	Estuary	Nalón estuary	Capture	4Y65382	Emberiza schoeniclus	0
313	2021-11-21	Wintering estuary	Estuary	Nalón estuary	Capture	4Y65383	Emberiza schoeniclus	0
314	2021-11-21	Wintering estuary	Estuary	Nalón estuary	Capture	4Y65384	Emberiza schoeniclus	0
315	2021-11-21	Wintering estuary	Estuary	Nalón estuary	Capture	4Y65385	Emberiza schoeniclus	0
316	2021-11-21	Wintering estuary	Estuary	Nalón estuary	Capture	4Y65386	Emberiza schoeniclus	0
317	2021-11-21	Wintering estuary	Estuary	Nalón estuary	Capture	4Y65387	Emberiza schoeniclus	0
318	2021-11-21	Wintering estuary	Estuary	Nalón estuary	Capture	4Y65390	Emberiza schoeniclus	0
319	2021-11-21	Wintering estuary	Estuary	Nalón estuary	Capture	4Y65391	Emberiza schoeniclus	0
320	2021-11-21	Wintering estuary	Estuary	Nalón estuary	Capture	4Y65392	Emberiza schoeniclus	0
321	2021-11-21	Wintering estuary	Estuary	Nalón estuary	Capture	4Y65393	Emberiza schoeniclus	0
322	2021-11-21	Wintering estuary	Estuary	Nalón estuary	Capture	4Y65394	Emberiza schoeniclus	0
323	2021-11-21	Wintering estuary	Estuary	Nalón estuary	Capture	4Y65395	Emberiza schoeniclus	0
324	2021-11-21	Wintering estuary	Estuary	Nalón estuary	Capture	4Y65396	Emberiza schoeniclus	0
325	2021-11-21	Wintering estuary	Estuary	Nalón estuary	Capture	4Y65397	Emberiza schoeniclus	0
326	2021-11-21	Wintering estuary	Estuary	Nalón estuary	Capture	4Y65398	Emberiza schoeniclus	0
327	2021-11-21	Wintering estuary	Estuary	Nalón estuary	Capture	4Y65399	Emberiza schoeniclus	0
328	2021-11-21	Wintering estuary	Estuary	Nalón estuary	Capture	4Y65400	Emberiza schoeniclus	0
329	2021-11-21	Wintering estuary	Estuary	Nalón estuary	Capture	3Y04401	Emberiza schoeniclus	0
330	2021-11-21	Wintering estuary	Estuary	Nalón estuary	Capture	3Y04402	Emberiza schoeniclus	0
331	2021-11-21	Wintering estuary	Estuary	Nalón estuary	Capture	3Y04404	Emberiza schoeniclus	0
332	2021-11-21	Wintering estuary	Estuary	Nalón estuary	Capture	3Y04405	Emberiza schoeniclus	0
333	2021-11-21	Wintering estuary	Estuary	Nalón estuary	Capture	3Y04406	Emberiza schoeniclus	0
334	2021-11-21	Wintering estuary	Estuary	Nalón estuary	Control	4Y65329	Emberiza schoeniclus	0
335	2021-11-21	Wintering estuary	Estuary	Nalón estuary	Recovery	4Y02933	Emberiza schoeniclus	0
336	2021-11-21	Wintering estuary	Estuary	Nalón estuary	Recovery	3Y73655	Emberiza schoeniclus	0
337	2021-11-21	Wintering estuary	Estuary	Nalón estuary	Recovery	3Y73576	Emberiza schoeniclus	0
338	2021-11-21	Wintering estuary	Estuary	Nalón estuary	Recovery	2Y48515	Emberiza schoeniclus	0
339	2021-11-21	Wintering estuary	Estuary	Nalón estuary	Recovery	3Y96793	Emberiza schoeniclus	0
340	2021-11-21	Wintering estuary	Estuary	Nalón estuary	Capture	4Y65366	Erithacus rubecula	0
341	2021-11-21	Wintering estuary	Estuary	Nalón estuary	Capture	4Y65388	Erithacus rubecula	0
342	2021-11-21	Wintering estuary	Estuary	Nalón estuary	Control	4Y65260	Erithacus rubecula	0
343	2021-11-21	Wintering estuary	Estuary	Nalón estuary	Recovery	4Y02873	Erithacus rubecula	0
344	2021-11-21	Wintering estuary	Estuary	Nalón estuary	Capture	3KA71647	Fringilla coelebs	0
345	2021-11-21	Wintering estuary	Estuary	Nalón estuary	Capture	3KA71648	Fringilla coelebs	0
346	2021-11-21	Wintering estuary	Estuary	Nalón estuary	Capture	3KA71649	Fringilla coelebs	0
347	2021-11-21	Wintering estuary	Estuary	Nalón estuary	Capture	3KA71646	Parus major	0
348	2021-11-21	Wintering estuary	Estuary	Nalón estuary	Capture	3Z00946	Periparus ater	0
349	2021-11-21	Wintering estuary	Estuary	Nalón estuary	Capture	3Z00925	Phylloscopus collybita	0
350	2021-11-21	Wintering estuary	Estuary	Nalón estuary	Capture	3Z00926	Phylloscopus collybita	0
351	2021-11-21	Wintering estuary	Estuary	Nalón estuary	Capture	3Z00927	Phylloscopus collybita	0
352	2021-11-21	Wintering estuary	Estuary	Nalón estuary	Capture	3Z00928	Phylloscopus collybita	0
353	2021-11-21	Wintering estuary	Estuary	Nalón estuary	Capture	3Z00929	Phylloscopus collybita	0
354	2021-11-21	Wintering estuary	Estuary	Nalón estuary	Capture	3Z00930	Phylloscopus collybita	0
355	2021-11-21	Wintering estuary	Estuary	Nalón estuary	Capture	3Z00931	Phylloscopus collybita	0
356	2021-11-21	Wintering estuary	Estuary	Nalón estuary	Capture	3Z00932	Phylloscopus collybita	0
357	2021-11-21	Wintering estuary	Estuary	Nalón estuary	Capture	3Z00933	Phylloscopus collybita	0
358	2021-11-21	Wintering estuary	Estuary	Nalón estuary	Capture	3Z00934	Phylloscopus collybita	0
359	2021-11-21	Wintering estuary	Estuary	Nalón estuary	Capture	3Z00935	Phylloscopus collybita	0
360	2021-11-21	Wintering estuary	Estuary	Nalón estuary	Capture	3Z00936	Phylloscopus collybita	0
361	2021-11-21	Wintering estuary	Estuary	Nalón estuary	Capture	3Z00937	Phylloscopus collybita	0
362	2021-11-21	Wintering estuary	Estuary	Nalón estuary	Capture	3Z00938	Phylloscopus collybita	0
363	2021-11-21	Wintering estuary	Estuary	Nalón estuary	Capture	3Z00939	Phylloscopus collybita	1	I. frontalis	larvae	eyelid	fully feed
364	2021-11-21	Wintering estuary	Estuary	Nalón estuary	Capture	3Z00940	Phylloscopus collybita	0
365	2021-11-21	Wintering estuary	Estuary	Nalón estuary	Capture	3Z00941	Phylloscopus collybita	0
366	2021-11-21	Wintering estuary	Estuary	Nalón estuary	Capture	3Z00942	Phylloscopus collybita	0
367	2021-11-21	Wintering estuary	Estuary	Nalón estuary	Capture	3Z00943	Phylloscopus collybita	0
368	2021-11-21	Wintering estuary	Estuary	Nalón estuary	Capture	3Z00944	Phylloscopus collybita	0
369	2021-11-21	Wintering estuary	Estuary	Nalón estuary	Capture	3Z00945	Phylloscopus collybita	0
370	2021-11-21	Wintering estuary	Estuary	Nalón estuary	Capture	3Z00947	Phylloscopus collybita	0
371	2021-11-21	Wintering estuary	Estuary	Nalón estuary	Capture	3Z00948	Phylloscopus collybita	0
372	2021-11-21	Wintering estuary	Estuary	Nalón estuary	Capture	3Z00949	Phylloscopus collybita	0
373	2021-11-21	Wintering estuary	Estuary	Nalón estuary	Capture	3Z00950	Phylloscopus collybita	0
374	2021-11-21	Wintering estuary	Estuary	Nalón estuary	Capture	3Z00951	Phylloscopus collybita	0
375	2021-11-21	Wintering estuary	Estuary	Nalón estuary	Capture	3KA71643	Prunella modularis	0
376	2021-11-21	Wintering estuary	Estuary	Nalón estuary	Capture	3KA71644	Sylvia atricapilla	0
377	2021-11-21	Wintering estuary	Estuary	Nalón estuary	Capture	3KA71645	Sylvia atricapilla	0
378	2021-12-12	Wintering estuary	Estuary	Nalón estuary	Capture	3Y04410	Anthus pratensis	0
379	2021-12-12	Wintering estuary	Estuary	Nalón estuary	Control	4Y65297	Cettia cetti	0
380	2021-12-12	Wintering estuary	Estuary	Nalón estuary	Control	4Y65445	Cettia cetti	0
381	2021-12-12	Wintering estuary	Estuary	Nalón estuary	Capture	3KA71650	Chloris chloris	0
382	2021-12-12	Wintering estuary	Estuary	Nalón estuary	Capture	3Z00966	Cisticola juncidis	0
383	2021-12-12	Wintering estuary	Estuary	Nalón estuary	Capture	3Z00973	Cisticola juncidis	0
384	2021-12-12	Wintering estuary	Estuary	Nalón estuary	Capture	3Y04408	Emberiza schoeniclus	0
385	2021-12-12	Wintering estuary	Estuary	Nalón estuary	Capture	3Y04409	Emberiza schoeniclus	0
386	2021-12-12	Wintering estuary	Estuary	Nalón estuary	Capture	3Y04411	Emberiza schoeniclus	0
387	2021-12-12	Wintering estuary	Estuary	Nalón estuary	Capture	3Y04412	Emberiza schoeniclus	0
388	2021-12-12	Wintering estuary	Estuary	Nalón estuary	Capture	3Y04414	Emberiza schoeniclus	0
389	2021-12-12	Wintering estuary	Estuary	Nalón estuary	Capture	3Y04415	Emberiza schoeniclus	0
390	2021-12-12	Wintering estuary	Estuary	Nalón estuary	Capture	3Y04416	Emberiza schoeniclus	0
391	2021-12-12	Wintering estuary	Estuary	Nalón estuary	Control	4Y65387	Emberiza schoeniclus	0
392	2021-12-12	Wintering estuary	Estuary	Nalón estuary	Control	4Y65382	Emberiza schoeniclus	0
393	2021-12-12	Wintering estuary	Estuary	Nalón estuary	Control	4Y65381	Emberiza schoeniclus	0
394	2021-12-12	Wintering estuary	Estuary	Nalón estuary	Capture	3Y04407	Erithacus rubecula	0
395	2021-12-12	Wintering estuary	Estuary	Nalón estuary	Capture	3Y04413	Erithacus rubecula	0
396	2021-12-12	Wintering estuary	Estuary	Nalón estuary	Control	4Y65388	Erithacus rubecula	0
397	2021-12-12	Wintering estuary	Estuary	Nalón estuary	Control	4Y65260	Erithacus rubecula	0
398	2021-12-12	Wintering estuary	Estuary	Nalón estuary	Control	4Y65298	Erithacus rubecula	0
399	2021-12-12	Wintering estuary	Estuary	Nalón estuary	Control	4Y65001	Erithacus rubecula	0
400	2021-12-12	Wintering estuary	Estuary	Nalón estuary	Control	4Y65300	Erithacus rubecula	0
401	2021-12-12	Wintering estuary	Estuary	Nalón estuary	Capture	3Z00952	Phylloscopus collybita	0
402	2021-12-12	Wintering estuary	Estuary	Nalón estuary	Capture	3Z00953	Phylloscopus collybita	0
403	2021-12-12	Wintering estuary	Estuary	Nalón estuary	Capture	3Z00954	Phylloscopus collybita	0
404	2021-12-12	Wintering estuary	Estuary	Nalón estuary	Capture	3Z00955	Phylloscopus collybita	0
405	2021-12-12	Wintering estuary	Estuary	Nalón estuary	Capture	3Z00956	Phylloscopus collybita	0
406	2021-12-12	Wintering estuary	Estuary	Nalón estuary	Capture	3Z00957	Phylloscopus collybita	0
407	2021-12-12	Wintering estuary	Estuary	Nalón estuary	Capture	3Z00958	Phylloscopus collybita	0
408	2021-12-12	Wintering estuary	Estuary	Nalón estuary	Capture	3Z00959	Phylloscopus collybita	0
409	2021-12-12	Wintering estuary	Estuary	Nalón estuary	Capture	3Z00960	Phylloscopus collybita	0
410	2021-12-12	Wintering estuary	Estuary	Nalón estuary	Capture	3Z00961	Phylloscopus collybita	0
411	2021-12-12	Wintering estuary	Estuary	Nalón estuary	Capture	3Z00962	Phylloscopus collybita	0
412	2021-12-12	Wintering estuary	Estuary	Nalón estuary	Capture	3Z00963	Phylloscopus collybita	0
413	2021-12-12	Wintering estuary	Estuary	Nalón estuary	Capture	3Z00964	Phylloscopus collybita	0
414	2021-12-12	Wintering estuary	Estuary	Nalón estuary	Capture	3Z00965	Phylloscopus collybita	0
415	2021-12-12	Wintering estuary	Estuary	Nalón estuary	Capture	3Z00968	Phylloscopus collybita	0
416	2021-12-12	Wintering estuary	Estuary	Nalón estuary	Capture	3Z00969	Phylloscopus collybita	0
417	2021-12-12	Wintering estuary	Estuary	Nalón estuary	Capture	3Z00970	Phylloscopus collybita	0
418	2021-12-12	Wintering estuary	Estuary	Nalón estuary	Capture	3Z00971	Phylloscopus collybita	0
419	2021-12-12	Wintering estuary	Estuary	Nalón estuary	Capture	3Z00972	Phylloscopus collybita	0
420	2021-12-12	Wintering estuary	Estuary	Nalón estuary	Capture	3Z00974	Phylloscopus collybita	0
421	2021-12-12	Wintering estuary	Estuary	Nalón estuary	Capture	3Z00975	Phylloscopus collybita	0
422	2021-12-12	Wintering estuary	Estuary	Nalón estuary	Capture	3Z00967	Troglodytes troglodytes	0
423	2021-12-12	Wintering estuary	Estuary	Nalón estuary	Capture	B99938	Turdus merula	0
424	2021-12-12	Wintering estuary	Estuary	Nalón estuary	Capture	L36946	Turdus philomelos	0
425	2021-12-12	Wintering estuary	Estuary	Nalón estuary	Capture	L36947	Turdus philomelos	0
426	2021-12-19	Wintering estuary	Estuary	Villaviciosa estuary	Capture	3KA71652	Chloris chloris	0
427	2021-12-19	Wintering estuary	Estuary	Villaviciosa estuary	Capture	3Y04417	Emberiza schoeniclus	0
428	2021-12-19	Wintering estuary	Estuary	Villaviciosa estuary	Capture	3Y04418	Emberiza schoeniclus	0
429	2021-12-19	Wintering estuary	Estuary	Villaviciosa estuary	Capture	3Y04419	Emberiza schoeniclus	0
430	2021-12-19	Wintering estuary	Estuary	Villaviciosa estuary	Capture	3Y04420	Emberiza schoeniclus	0
431	2021-12-19	Wintering estuary	Estuary	Villaviciosa estuary	Capture	3Y04421	Emberiza schoeniclus	0
432	2021-12-19	Wintering estuary	Estuary	Villaviciosa estuary	Capture	3Y04422	Emberiza schoeniclus	0
433	2021-12-19	Wintering estuary	Estuary	Villaviciosa estuary	Capture	3Y04424	Emberiza schoeniclus	0
434	2021-12-19	Wintering estuary	Estuary	Villaviciosa estuary	Control	4Y65382	Emberiza schoeniclus	0
435	2021-12-19	Wintering estuary	Estuary	Villaviciosa estuary	Control	4Y65387	Emberiza schoeniclus	0
436	2021-12-19	Wintering estuary	Estuary	Villaviciosa estuary	Control	4Y65334	Emberiza schoeniclus	0
437	2021-12-19	Wintering estuary	Estuary	Villaviciosa estuary	Capture	3Z00976	Phylloscopus collybita	0
438	2021-12-19	Wintering estuary	Estuary	Villaviciosa estuary	Capture	3Z00977	Phylloscopus collybita	0
439	2021-12-19	Wintering estuary	Estuary	Villaviciosa estuary	Capture	3Z00978	Phylloscopus collybita	0
440	2021-12-19	Wintering estuary	Estuary	Villaviciosa estuary	Capture	3Z00979	Phylloscopus collybita	0
441	2021-12-19	Wintering estuary	Estuary	Villaviciosa estuary	Capture	3Z00980	Phylloscopus collybita	0
442	2021-12-19	Wintering estuary	Estuary	Villaviciosa estuary	Capture	3Z00981	Phylloscopus collybita	0
443	2021-12-19	Wintering estuary	Estuary	Villaviciosa estuary	Capture	3KA71651	Prunella modularis	0
444	2021-12-19	Wintering estuary	Estuary	Villaviciosa estuary	ReCapture	1Z99260	Regulus ignicapilla	0
445	2021-12-19	Wintering estuary	Estuary	Villaviciosa estuary	Capture	3Y04423	Saxicola rubicola	0
446	2021-12-19	Wintering estuary	Estuary	Villaviciosa estuary	Capture	L36948	Turdus philomelos	0
447	2021-12-19	Wintering estuary	Estuary	Villaviciosa estuary	Capture	L36949	Turdus philomelos	0
448	2021-12-26	Wintering estuary	Estuary	Villaviciosa estuary	Capture	3Y04433	Anthus pratensis	0
449	2021-12-26	Wintering estuary	Estuary	Villaviciosa estuary	Capture	3Y04435	Anthus pratensis	0
450	2021-12-26	Wintering estuary	Estuary	Villaviciosa estuary	Capture	3Y04441	Anthus pratensis	0
451	2021-12-26	Wintering estuary	Estuary	Villaviciosa estuary	Capture	3Y04442	Anthus pratensis	0
452	2021-12-26	Wintering estuary	Estuary	Villaviciosa estuary	Capture	3Y04447	Anthus pratensis	0
453	2021-12-26	Wintering estuary	Estuary	Villaviciosa estuary	Control	4Y65354	Anthus pratensis	0
454	2021-12-26	Wintering estuary	Estuary	Villaviciosa estuary	Control	4Y65467	Anthus pratensis	0
455	2021-12-26	Wintering estuary	Estuary	Villaviciosa estuary	Capture	3Y04426	Anthus spinoletta	0
456	2021-12-26	Wintering estuary	Estuary	Villaviciosa estuary	Capture	3Y04427	Anthus spinoletta	0
457	2021-12-26	Wintering estuary	Estuary	Villaviciosa estuary	Capture	3Y04428	Anthus spinoletta	0
458	2021-12-26	Wintering estuary	Estuary	Villaviciosa estuary	Capture	3Y04429	Anthus spinoletta	0
459	2021-12-26	Wintering estuary	Estuary	Villaviciosa estuary	Capture	3Y04430	Anthus spinoletta	0
460	2021-12-26	Wintering estuary	Estuary	Villaviciosa estuary	Capture	3Y04432	Anthus spinoletta	0
461	2021-12-26	Wintering estuary	Estuary	Villaviciosa estuary	Capture	3Y04434	Anthus spinoletta	0
462	2021-12-26	Wintering estuary	Estuary	Villaviciosa estuary	Capture	3Y04436	Anthus spinoletta	0
463	2021-12-26	Wintering estuary	Estuary	Villaviciosa estuary	Capture	3Y04437	Anthus spinoletta	0
464	2021-12-26	Wintering estuary	Estuary	Villaviciosa estuary	Capture	3Y04438	Anthus spinoletta	0
465	2021-12-26	Wintering estuary	Estuary	Villaviciosa estuary	Capture	3Y04443	Anthus spinoletta	0
466	2021-12-26	Wintering estuary	Estuary	Villaviciosa estuary	Capture	3Y04444	Anthus spinoletta	0
467	2021-12-26	Wintering estuary	Estuary	Villaviciosa estuary	Capture	3Y04445	Anthus spinoletta	0
468	2021-12-26	Wintering estuary	Estuary	Villaviciosa estuary	Control	4Y65348	Cettia cetti	0
469	2021-12-26	Wintering estuary	Estuary	Villaviciosa estuary	Capture	3KA71657	Chloris chloris	0
470	2021-12-26	Wintering estuary	Estuary	Villaviciosa estuary	Capture	3Y04425	Emberiza schoeniclus	0
471	2021-12-26	Wintering estuary	Estuary	Villaviciosa estuary	Capture	3Y04439	Emberiza schoeniclus	0
472	2021-12-26	Wintering estuary	Estuary	Villaviciosa estuary	Capture	3Y04440	Emberiza schoeniclus	0
473	2021-12-26	Wintering estuary	Estuary	Villaviciosa estuary	Capture	3Y04431	Erithacus rubecula	0
474	2021-12-26	Wintering estuary	Estuary	Villaviciosa estuary	Capture	3KA71656	Fringilla coelebs	0
475	2021-12-26	Wintering estuary	Estuary	Villaviciosa estuary	Capture	3Z00983	Phylloscopus collybita	0
476	2021-12-26	Wintering estuary	Estuary	Villaviciosa estuary	Capture	3KA71653	Sylvia atricapilla	0
477	2021-12-26	Wintering estuary	Estuary	Villaviciosa estuary	Capture	3KA71654	Sylvia atricapilla	0
478	2021-12-26	Wintering estuary	Estuary	Villaviciosa estuary	Capture	3KA71655	Sylvia atricapilla	0
479	2021-12-26	Wintering estuary	Estuary	Villaviciosa estuary	Capture	3Y04446	Sylvia melanocephala	0
480	2021-12-26	Wintering estuary	Estuary	Villaviciosa estuary	Capture	3Z00982	Troglodytes troglodytes	0
481	2021-12-26	Wintering estuary	Estuary	Villaviciosa estuary	Capture	3Z00984	Troglodytes troglodytes	0
482	2021-12-26	Wintering estuary	Estuary	Villaviciosa estuary	Capture	L36950	Turdus iliacus	0
483	2021-12-26	Wintering estuary	Estuary	Villaviciosa estuary	Capture	B99939	Turdus merula	0
484	2021-12-26	Wintering estuary	Estuary	Villaviciosa estuary	Capture	B99940	Turdus merula	0
485	2021-12-26	Wintering estuary	Estuary	Villaviciosa estuary	Capture	L36453	Turdus philomelos	0
486	2021-12-26	Wintering estuary	Estuary	Villaviciosa estuary	Capture	L36454	Turdus philomelos	0
487	2022-02-06	Wintering estuary	Estuary	Nalón estuary	Capture	3KA71658	Alauda arvensis	0
488	2022-02-06	Wintering estuary	Estuary	Nalón estuary	Control	4Y65293	Cettia cetti	0
489	2022-02-06	Wintering estuary	Estuary	Nalón estuary	Control	4Y65058	Cettia cetti	0
490	2022-02-06	Wintering estuary	Estuary	Nalón estuary	Control	4Y65297	Cettia cetti	0
491	2022-02-06	Wintering estuary	Estuary	Nalón estuary	Capture	3Y04448	Emberiza schoeniclus	0
492	2022-02-06	Wintering estuary	Estuary	Nalón estuary	Capture	3Y04449	Emberiza schoeniclus	0
493	2022-02-06	Wintering estuary	Estuary	Nalón estuary	Capture	3Y04450	Emberiza schoeniclus	0
494	2022-02-06	Wintering estuary	Estuary	Nalón estuary	Capture	3Y04451	Emberiza schoeniclus	0
495	2022-02-06	Wintering estuary	Estuary	Nalón estuary	Capture	3Y04452	Emberiza schoeniclus	0
496	2022-02-06	Wintering estuary	Estuary	Nalón estuary	Control	4Y65381	Emberiza schoeniclus	0
497	2022-02-06	Wintering estuary	Estuary	Nalón estuary	Control	3Y04415	Emberiza schoeniclus	0
498	2022-02-06	Wintering estuary	Estuary	Nalón estuary	Control	3Y04424	Emberiza schoeniclus	0
499	2022-02-06	Wintering estuary	Estuary	Nalón estuary			Troglodytes troglodytes	0
500	2022-02-13	Wintering estuary	Estuary	Villaviciosa estuary	Capture	3Y04453	Anthus pratensis	0
501	2022-02-13	Wintering estuary	Estuary	Villaviciosa estuary	Capture	3Y04454	Anthus pratensis	0
502	2022-02-13	Wintering estuary	Estuary	Villaviciosa estuary	Capture	3Y04455	Anthus pratensis	0
503	2022-02-13	Wintering estuary	Estuary	Villaviciosa estuary	Capture	3Y04456	Anthus pratensis	0
504	2022-02-13	Wintering estuary	Estuary	Villaviciosa estuary	Capture	3Y04457	Anthus pratensis	0
505	2022-02-13	Wintering estuary	Estuary	Villaviciosa estuary	Capture	3Y04460	Anthus pratensis	0
506	2022-02-13	Wintering estuary	Estuary	Villaviciosa estuary	Capture	3Z00985	Cisticola juncidis	0
507	2022-02-13	Wintering estuary	Estuary	Villaviciosa estuary	Capture	3Z00986	Cisticola juncidis	0
508	2022-02-13	Wintering estuary	Estuary	Villaviciosa estuary	Control	1Z99381	Cisticola juncidis	0
509	2022-02-13	Wintering estuary	Estuary	Villaviciosa estuary	Control	3Y04425	Emberiza schoeniclus	0
510	2022-02-13	Wintering estuary	Estuary	Villaviciosa estuary	Capture	3Y04459	Saxicola rubicola	0
511	2022-02-13	Wintering estuary	Estuary	Villaviciosa estuary	Capture	3Y04458	Sylvia melanocephala	0
512	2022-02-13	Wintering estuary	Estuary	Villaviciosa estuary	Capture	B99941	Turdus merula	0
513	2022-02-13	Wintering estuary	Estuary	Villaviciosa estuary	Capture	L36455	Turdus philomelos	0
514	2022-02-13	Wintering estuary	Estuary	Villaviciosa estuary	Capture	L36456	Turdus philomelos	0
515	2022-02-13	Wintering estuary	Estuary	Villaviciosa estuary	Capture	L36457	Turdus philomelos	0
516	2022-02-13	Wintering estuary	Estuary	Villaviciosa estuary	Capture	L36458	Turdus philomelos	0
517	2022-02-17	Wintering estuary	Estuary	Nalón estuary	Capture		Cettia cetti	0
518	2022-02-17	Wintering estuary	Estuary	Nalón estuary	Capture	3Y04461	Emberiza schoeniclus	0
519	2022-02-17	Wintering estuary	Estuary	Nalón estuary	Capture	3Y04462	Emberiza schoeniclus	0
520	2022-02-17	Wintering estuary	Estuary	Nalón estuary	Capture	3Y04463	Emberiza schoeniclus	0
521	2022-02-17	Wintering estuary	Estuary	Nalón estuary	Capture	3Y04401	Emberiza schoeniclus	0
522	2022-02-17	Wintering estuary	Estuary	Nalón estuary	Control	4Y65300	Emberiza schoeniclus	0
523	2022-02-17	Wintering estuary	Estuary	Nalón estuary	Control	3Y04424	Emberiza schoeniclus	0
524	2022-02-17	Wintering estuary	Estuary	Nalón estuary	ReCapture	4Y02879	Emberiza schoeniclus	0
525	2022-02-17	Wintering estuary	Estuary	Nalón estuary	Capture	3Z00987	Phylloscopus collybita	0
526	2022-02-17	Wintering estuary	Estuary	Nalón estuary	Capture	3Z00988	Phylloscopus collybita	0
527	2022-02-17	Wintering estuary	Estuary	Nalón estuary	Capture	3Z00989	Phylloscopus collybita	0
528	2022-02-17	Wintering estuary	Estuary	Nalón estuary	Control	3KA71651	Prunella modularis	0
529	2022-02-17	Wintering estuary	Estuary	Nalón estuary	Capture	B99942	Turdus merula	0
530	2022-02-17	Wintering estuary	Estuary	Nalón estuary	Capture	B99943	Turdus merula	0
531	2022-02-17	Wintering estuary	Estuary	Nalón estuary	Capture	B99944	Turdus merula	0
532	2022-02-17	Wintering estuary	Estuary	Nalón estuary	ReCapture	B99926	Turdus merula	0
533	2022-02-20	Wintering estuary	Estuary	Villaviciosa estuary	Capture	3Y04468	Anthus petrosus	0
534	2022-02-20	Wintering estuary	Estuary	Villaviciosa estuary	Capture	3Y04464	Anthus pratensis	0
535	2022-02-20	Wintering estuary	Estuary	Villaviciosa estuary	Capture	3Y04467	Anthus pratensis	0
536	2022-02-20	Wintering estuary	Estuary	Villaviciosa estuary	Capture	3Y04466	Anthus spinoletta	0
537	2022-02-20	Wintering estuary	Estuary	Villaviciosa estuary	Capture	3Y04465	Cettia cetti	0
538	2022-02-20	Wintering estuary	Estuary	Villaviciosa estuary	Control	3Y04431	Erithacus rubecula	0
539	2022-02-27	Wintering estuary	Estuary	Villaviciosa estuary	Capture	3Y04473	Anthus spinoletta	0
540	2022-02-27	Wintering estuary	Estuary	Villaviciosa estuary	Control	4Y65348	Cettia cetti	0
541	2022-02-27	Wintering estuary	Estuary	Villaviciosa estuary	Capture	3Y04469	Emberiza schoeniclus	0
542	2022-02-27	Wintering estuary	Estuary	Villaviciosa estuary	Capture	3Y04470	Emberiza schoeniclus	0
543	2022-02-27	Wintering estuary	Estuary	Villaviciosa estuary	Capture	3Y04471	Emberiza schoeniclus	0
544	2022-02-27	Wintering estuary	Estuary	Villaviciosa estuary	Capture	3Y04472	Emberiza schoeniclus	0
545	2022-02-27	Wintering estuary	Estuary	Villaviciosa estuary	Capture	3KA71659	Sylvia atricapilla	0
546	2022-02-27	Wintering estuary	Estuary	Villaviciosa estuary	Capture	3KA71660	Sylvia atricapilla	0
547	2022-02-27	Wintering estuary	Estuary	Villaviciosa estuary	Capture	L36459	Turdus philomelos	0
548	2022-03-07	Wintering estuary	Estuary	Villaviciosa estuary	Capture	3Y04474	Anthus pratensis	0
549	2022-03-07	Wintering estuary	Estuary	Villaviciosa estuary	Capture	3Y04475	Anthus pratensis	0
550	2022-03-07	Wintering estuary	Estuary	Villaviciosa estuary	Capture	3Y04476	Anthus pratensis	0
551	2022-03-07	Wintering estuary	Estuary	Villaviciosa estuary	Capture	3Y04477	Anthus pratensis	0
552	2022-03-07	Wintering estuary	Estuary	Villaviciosa estuary	Capture	3Y04479	Anthus pratensis	0
553	2022-03-07	Wintering estuary	Estuary	Villaviciosa estuary	Capture	3Y04480	Anthus pratensis	0
554	2022-03-07	Wintering estuary	Estuary	Villaviciosa estuary	Control	4Y65323	Anthus pratensis	0
555	2022-03-07	Wintering estuary	Estuary	Villaviciosa estuary	Capture	3Y04478	Emberiza schoeniclus	0
556	2022-03-07	Wintering estuary	Estuary	Villaviciosa estuary	Capture	3Z00990	Phylloscopus collybita	0
557	2022-03-07	Wintering estuary	Estuary	Villaviciosa estuary	Recovery	AXN004	Phylloscopus collybita	0
558	2022-03-20	Forest birds	Forest	Nava (Praeres)	Capture	3Z00992	Certhia brachydactyla	0
559	2022-03-20	Forest birds	Forest	Nava (Praeres)	Capture	3Z00994	Certhia brachydactyla	0
560	2022-03-20	Forest birds	Forest	Nava (Praeres)	Capture	3Y04481	Cyanistes caeruleus	0
561	2022-03-20	Forest birds	Forest	Nava (Praeres)	Capture	3Y04482	Cyanistes caeruleus	0
562	2022-03-20	Forest birds	Forest	Nava (Praeres)	Capture	3Y04483	Erithacus rubecula	0
563	2022-03-20	Forest birds	Forest	Nava (Praeres)	Capture	3KA71663	Parus major	0
564	2022-03-20	Forest birds	Forest	Nava (Praeres)	Capture	3Z00995	Periparus ater	0
565	2022-03-20	Forest birds	Forest	Nava (Praeres)	Capture	3Y04484	Poecile palustris	0
566	2022-03-20	Forest birds	Forest	Nava (Praeres)	Capture	3Y04485	Poecile palustris	0
567	2022-03-20	Forest birds	Forest	Nava (Praeres)	Capture	3Y04486	Poecile palustris	0
568	2022-03-20	Forest birds	Forest	Nava (Praeres)	Capture	3Z00991	Regulus ignicapilla	0
569	2022-03-20	Forest birds	Forest	Nava (Praeres)	Capture	3Z00993	Regulus ignicapilla	0
570	2022-03-20	Forest birds	Forest	Nava (Praeres)	Capture	3KA71661	Sitta europaea	0
571	2022-03-20	Forest birds	Forest	Nava (Praeres)	Capture	3KA71662	Sitta europaea	0
572	2022-03-27	Forest birds	Forest	Nava (Praeres)	Capture	3Z00996	Aegithalos caudatus	1	I. ricinus	nymph	eyelid	half feed
573	2022-03-27	Forest birds	Forest	Nava (Praeres)	Capture	3Z00998	Aegithalos caudatus	2	I. ricinus	nymph	eyelid	n.a.
574	2022-03-27	Forest birds	Forest	Nava (Praeres)	Capture	4Z00901	Certhia brachydactyla	0
575	2022-03-27	Forest birds	Forest	Nava (Praeres)	Capture	3Y04486	Poecile palustris	0
576	2022-03-27	Forest birds	Forest	Nava (Praeres)	Capture	3Y04487	Poecile palustris	0
577	2022-03-27	Forest birds	Forest	Nava (Praeres)	Capture	3Z00997	Regulus ignicapilla	0
578	2022-03-27	Forest birds	Forest	Nava (Praeres)	Capture	3Z00999	Regulus ignicapilla	0
579	2022-03-27	Forest birds	Forest	Nava (Praeres)	Capture	3Z01000	Regulus ignicapilla	0
580	2022-03-27	Forest birds	Forest	Nava (Praeres)	Capture	4Z00902	Regulus ignicapilla	0
581	2022-03-27	Forest birds	Forest	Nava (Praeres)	Capture	4Z00903	Regulus ignicapilla	0
582	2022-04-10	Forest birds	Forest	Nava (Praeres)	Capture	4Z00910	Certhia brachydactyla	0
583	2022-04-10	Forest birds	Forest	Nava (Praeres)	Control	4Z00901	Certhia brachydactyla	0
584	2022-04-10	Forest birds	Forest	Nava (Praeres)	Capture	4Z00908	Periparus ater	0
585	2022-04-10	Forest birds	Forest	Nava (Praeres)	Capture	4Z00909	Periparus ater	0
586	2022-04-10	Forest birds	Forest	Nava (Praeres)	Capture	3Y04491	Poecile palustris	0
587	2022-04-10	Forest birds	Forest	Nava (Praeres)	Capture	4Z00906	Regulus ignicapilla	0
588	2022-04-10	Forest birds	Forest	Nava (Praeres)	Capture	4Z00907	Regulus ignicapilla	0
589	2022-04-10	Forest birds	Forest	Nava (Praeres)	Capture	L36460	Turdus philomelos	0
590	2022-04-15	Forest birds	Forest	Somiedo	Capture	3Y04494	Erithacus rubecula	0
591	2022-04-15	Forest birds	Forest	Somiedo	Capture	3Y04495	Erithacus rubecula	0
592	2022-04-15	Forest birds	Forest	Somiedo	Capture	3Y04496	Erithacus rubecula	0
593	2022-04-15	Forest birds	Forest	Somiedo	Capture	3Y04497	Erithacus rubecula	0
594	2022-04-15	Forest birds	Forest	Somiedo	Capture	3Y04492	Luscinia svecica	0
595	2022-04-15	Forest birds	Forest	Somiedo	Capture	3Y04493	Luscinia svecica	0
596	2022-04-15	Forest birds	Forest	Somiedo	Capture	3Y04498	Luscinia svecica	0
597	2022-04-15	Forest birds	Forest	Somiedo	ReCapture	4Y02976	Luscinia svecica	0
598	2022-04-15	Forest birds	Forest	Somiedo	Capture	3KA71665	Prunella modularis	0
599	2022-04-15	Forest birds	Forest	Somiedo	Capture	3KA71666	Prunella modularis	0
600	2022-04-15	Forest birds	Forest	Somiedo	Capture	3KA71667	Prunella modularis	0
601	2022-04-15	Forest birds	Forest	Somiedo	Capture	3KA71668	Prunella modularis	0
602	2022-04-15	Forest birds	Forest	Somiedo	Capture	3KA71669	Prunella modularis	0
603	2022-04-15	Forest birds	Forest	Somiedo	Capture	3KA71670	Prunella modularis	0
604	2022-04-15	Forest birds	Forest	Somiedo	Capture	B99951	Turdus merula	0
605	2022-04-15	Forest birds	Forest	Somiedo	Capture	B99952	Turdus merula	4	I. ricinus	nymph	eyelid	n.a.
606	2022-04-17	Forest birds	Forest	Sobrescobio (Ladines)	Capture	4Z00911	Certhia brachydactyla	0
607	2022-04-17	Forest birds	Forest	Sobrescobio (Ladines)	Capture	4Z00912	Certhia brachydactyla	0
608	2022-04-17	Forest birds	Forest	Sobrescobio (Ladines)	Capture	3Y04501	Erithacus rubecula	0
609	2022-04-17	Forest birds	Forest	Sobrescobio (Ladines)	Capture	3KA71672	Parus major	1	I. ricinus	nymph	ear	n.a.
610	2022-04-17	Forest birds	Forest	Sobrescobio (Ladines)	Capture	3KA71674	Parus major	0
611	2022-04-17	Forest birds	Forest	Sobrescobio (Ladines)	Capture	3KA71675	Parus major	1	I. ricinus	nymph	eyelid	n.a.
612	2022-04-17	Forest birds	Forest	Sobrescobio (Ladines)	Capture	3Y04500	Poecile palustris	0
613	2022-04-17	Forest birds	Forest	Sobrescobio (Ladines)	Capture	4Z00913	Regulus ignicapilla	0
614	2022-04-17	Forest birds	Forest	Sobrescobio (Ladines)	Capture	3KA71673	Sitta europaea	0
615	2022-04-24	Forest birds	Forest	Nava (Fuensanta)	Capture	4Z00915	Certhia brachydactyla	0
616	2022-04-24	Forest birds	Forest	Nava (Fuensanta)	Capture	4Z00916	Certhia brachydactyla	0
617	2022-04-24	Forest birds	Forest	Nava (Fuensanta)	Capture	B999523	Dendrocopos major	0
618	2022-04-24	Forest birds	Forest	Nava (Fuensanta)	Capture	3KA71676	Fringilla coelebs	0
619	2022-04-24	Forest birds	Forest	Nava (Fuensanta)	Capture	3KA71677	Fringilla coelebs	0
620	2022-05-15			Fuera de programa	Capture	3Y04514	Motacilla flava	1	I. ricinus	nymph	eyelid	fully feed
621	2022-07-17	Postnuptial	Estuary	Villaviciosa estuary	Capture	3Y04519	Acrocephalus schoenobaenus	0
622	2022-07-17	Postnuptial	Estuary	Villaviciosa estuary	Capture	3Y04520	Acrocephalus schoenobaenus	0
623	2022-07-17	Postnuptial	Estuary	Villaviciosa estuary	Capture	3Y04521	Acrocephalus schoenobaenus	0
624	2022-07-17	Postnuptial	Estuary	Villaviciosa estuary	Capture	3Y04523	Acrocephalus schoenobaenus	0
625	2022-07-17	Postnuptial	Estuary	Villaviciosa estuary	Capture	3Y04524	Acrocephalus schoenobaenus	0
626	2022-07-17	Postnuptial	Estuary	Villaviciosa estuary	Capture	3Y04525	Acrocephalus schoenobaenus	0
627	2022-07-17	Postnuptial	Estuary	Villaviciosa estuary	Capture	3Y04526	Acrocephalus schoenobaenus	0
628	2022-07-17	Postnuptial	Estuary	Villaviciosa estuary	Capture	3Y04527	Acrocephalus schoenobaenus	0
629	2022-07-17	Postnuptial	Estuary	Villaviciosa estuary	Capture	3Y04528	Acrocephalus schoenobaenus	0
630	2022-07-17	Postnuptial	Estuary	Villaviciosa estuary	Capture	3Y04533	Acrocephalus schoenobaenus	0
631	2022-07-17	Postnuptial	Estuary	Villaviciosa estuary	Capture	3Y04535	Acrocephalus schoenobaenus	0
632	2022-07-17	Postnuptial	Estuary	Villaviciosa estuary	Capture	3Y04536	Acrocephalus schoenobaenus	0
633	2022-07-17	Postnuptial	Estuary	Villaviciosa estuary	Capture	3Y04537	Acrocephalus schoenobaenus	0
634	2022-07-17	Postnuptial	Estuary	Villaviciosa estuary	Capture	3Y04538	Acrocephalus schoenobaenus	0
635	2022-07-17	Postnuptial	Estuary	Villaviciosa estuary	Capture	3Y04539	Acrocephalus schoenobaenus	0
636	2022-07-17	Postnuptial	Estuary	Villaviciosa estuary	Capture	3Y04540	Acrocephalus schoenobaenus	0
637	2022-07-17	Postnuptial	Estuary	Villaviciosa estuary	Capture	3Y04541	Acrocephalus schoenobaenus	1	H. concinna	nymph	n.a.	fully feed
638	2022-07-17	Postnuptial	Estuary	Villaviciosa estuary	Capture	3Y04542	Acrocephalus schoenobaenus	0
639	2022-07-17	Postnuptial	Estuary	Villaviciosa estuary	Capture	3Y04543	Acrocephalus schoenobaenus	0
640	2022-07-17	Postnuptial	Estuary	Villaviciosa estuary	Capture	3Y04544	Acrocephalus schoenobaenus	0
641	2022-07-17	Postnuptial	Estuary	Villaviciosa estuary	Capture	3Y04547	Acrocephalus schoenobaenus	0
642	2022-07-17	Postnuptial	Estuary	Villaviciosa estuary	Capture	3Y04548	Acrocephalus schoenobaenus	0
643	2022-07-17	Postnuptial	Estuary	Villaviciosa estuary	Capture	3Y04550	Acrocephalus schoenobaenus	0
644	2022-07-17	Postnuptial	Estuary	Villaviciosa estuary	Capture	3Y04516	Acrocephalus scirpaceus	0
645	2022-07-17	Postnuptial	Estuary	Villaviciosa estuary	Capture	3Y04518	Acrocephalus scirpaceus	0
646	2022-07-17	Postnuptial	Estuary	Villaviciosa estuary	Capture	3Y04522	Acrocephalus scirpaceus	0
647	2022-07-17	Postnuptial	Estuary	Villaviciosa estuary	Capture	3Y04529	Acrocephalus scirpaceus	0
648	2022-07-17	Postnuptial	Estuary	Villaviciosa estuary	Capture	3Y04530	Acrocephalus scirpaceus	0
649	2022-07-17	Postnuptial	Estuary	Villaviciosa estuary	Capture	3Y04531	Acrocephalus scirpaceus	0
650	2022-07-17	Postnuptial	Estuary	Villaviciosa estuary	Capture		Acrocephalus scirpaceus	0
651	2022-07-17	Postnuptial	Estuary	Villaviciosa estuary	Capture	3Y04534	Acrocephalus scirpaceus	0
652	2022-07-17	Postnuptial	Estuary	Villaviciosa estuary	Capture	3Y04545	Acrocephalus scirpaceus	0
653	2022-07-17	Postnuptial	Estuary	Villaviciosa estuary	Capture	3Y04546	Acrocephalus scirpaceus	0
654	2022-07-17	Postnuptial	Estuary	Villaviciosa estuary	Capture	3Y04549	Acrocephalus scirpaceus	0
655	2022-07-17	Postnuptial	Estuary	Villaviciosa estuary	Capture	3Y04551	Acrocephalus scirpaceus	0
656	2022-07-17	Postnuptial	Estuary	Villaviciosa estuary	ReCapture	4Y02525	Acrocephalus scirpaceus	0
657	2022-07-17	Postnuptial	Estuary	Villaviciosa estuary	ReCapture	4Y65207	Acrocephalus scirpaceus	0
658	2022-07-17	Postnuptial	Estuary	Villaviciosa estuary	Capture	4Z00917	Cisticola juncidis	0
659	2022-07-17	Postnuptial	Estuary	Villaviciosa estuary	Capture	4Z01000	Cisticola juncidis	0
660	2022-07-17	Postnuptial	Estuary	Villaviciosa estuary	Capture	4Z00918	Cisticola juncidis	0
661	2022-07-17	Postnuptial	Estuary	Villaviciosa estuary	Capture	4Z00919	Cisticola juncidis	0
662	2022-07-17	Postnuptial	Estuary	Villaviciosa estuary	Capture		Cisticola juncidis	0
663	2022-07-17	Postnuptial	Estuary	Villaviciosa estuary	Capture	4Z00920	Cisticola juncidis	0
664	2022-07-17	Postnuptial	Estuary	Villaviciosa estuary	Capture	L36462	Lanius collurio	0
665	2022-07-17	Postnuptial	Estuary	Villaviciosa estuary	Capture	3Y04517	Saxicola rubicola	0
666	2022-07-17	Postnuptial	Estuary	Villaviciosa estuary	Capture	3Y04532	Saxicola rubicola	0
667	2022-07-24	Postnuptial	Estuary	Villaviciosa estuary	Capture	3Y04576	Acrocephalus schoenobaenus	0
668	2022-07-24	Postnuptial	Estuary	Villaviciosa estuary	Capture	3Y04577	Acrocephalus schoenobaenus	0
669	2022-07-24	Postnuptial	Estuary	Villaviciosa estuary	Capture	3Y04578	Acrocephalus schoenobaenus	0
670	2022-07-24	Postnuptial	Estuary	Villaviciosa estuary	Capture	3Y04580	Acrocephalus schoenobaenus	0
671	2022-07-24	Postnuptial	Estuary	Villaviciosa estuary	Capture	3Y04581	Acrocephalus schoenobaenus	0
672	2022-07-24	Postnuptial	Estuary	Villaviciosa estuary	Capture	3Y04582	Acrocephalus schoenobaenus	0
673	2022-07-24	Postnuptial	Estuary	Villaviciosa estuary	Capture	3Y04583	Acrocephalus schoenobaenus	0
674	2022-07-24	Postnuptial	Estuary	Villaviciosa estuary	Capture	3Y04584	Acrocephalus schoenobaenus	0
675	2022-07-24	Postnuptial	Estuary	Villaviciosa estuary	Capture	3Y04587	Acrocephalus schoenobaenus	0
676	2022-07-24	Postnuptial	Estuary	Villaviciosa estuary	Capture	3Y04588	Acrocephalus schoenobaenus	0
677	2022-07-24	Postnuptial	Estuary	Villaviciosa estuary	Capture	3Y04590	Acrocephalus schoenobaenus	0
678	2022-07-24	Postnuptial	Estuary	Villaviciosa estuary	Capture	3Y04591	Acrocephalus schoenobaenus	0
679	2022-07-24	Postnuptial	Estuary	Villaviciosa estuary	Capture	3Y04592	Acrocephalus schoenobaenus	0
680	2022-07-24	Postnuptial	Estuary	Villaviciosa estuary	Capture	3Y04593	Acrocephalus schoenobaenus	0
681	2022-07-24	Postnuptial	Estuary	Villaviciosa estuary	Capture	3Y04594	Acrocephalus schoenobaenus	0
682	2022-07-24	Postnuptial	Estuary	Villaviciosa estuary	Capture	3Y04595	Acrocephalus schoenobaenus	0
683	2022-07-24	Postnuptial	Estuary	Villaviciosa estuary	Capture	3Y04596	Acrocephalus schoenobaenus	0
684	2022-07-24	Postnuptial	Estuary	Villaviciosa estuary	Capture	3Y04599	Acrocephalus schoenobaenus	0
685	2022-07-24	Postnuptial	Estuary	Villaviciosa estuary	Capture	3Y04600	Acrocephalus schoenobaenus	0
686	2022-07-24	Postnuptial	Estuary	Villaviciosa estuary	Capture	3Y04601	Acrocephalus schoenobaenus	0
687	2022-07-24	Postnuptial	Estuary	Villaviciosa estuary	Capture	3Y04602	Acrocephalus schoenobaenus	0
688	2022-07-24	Postnuptial	Estuary	Villaviciosa estuary	Capture	3Y04603	Acrocephalus schoenobaenus	0
689	2022-07-24	Postnuptial	Estuary	Villaviciosa estuary	Capture	3Y04604	Acrocephalus schoenobaenus	0
690	2022-07-24	Postnuptial	Estuary	Villaviciosa estuary	Capture	3Y04605	Acrocephalus schoenobaenus	0
691	2022-07-24	Postnuptial	Estuary	Villaviciosa estuary	Capture	3Y04606	Acrocephalus schoenobaenus	0
692	2022-07-24	Postnuptial	Estuary	Villaviciosa estuary	Capture	3Y04608	Acrocephalus schoenobaenus	0
693	2022-07-24	Postnuptial	Estuary	Villaviciosa estuary	Capture	3Y04611	Acrocephalus schoenobaenus	0
694	2022-07-24	Postnuptial	Estuary	Villaviciosa estuary	Capture	3Y04613	Acrocephalus schoenobaenus	0
695	2022-07-24	Postnuptial	Estuary	Villaviciosa estuary	Capture	3Y04614	Acrocephalus schoenobaenus	0
696	2022-07-24	Postnuptial	Estuary	Villaviciosa estuary	Control	3Y04544	Acrocephalus schoenobaenus	0
697	2022-07-24	Postnuptial	Estuary	Villaviciosa estuary	Control	3Y04526	Acrocephalus schoenobaenus	0
698	2022-07-24	Postnuptial	Estuary	Villaviciosa estuary	Control	3Y04541	Acrocephalus schoenobaenus	0
699	2022-07-24	Postnuptial	Estuary	Villaviciosa estuary	Control	3Y04520	Acrocephalus schoenobaenus	0
700	2022-07-24	Postnuptial	Estuary	Villaviciosa estuary	Control	3Y04537	Acrocephalus schoenobaenus	0
701	2022-07-24	Postnuptial	Estuary	Villaviciosa estuary	Capture	3Y04585	Acrocephalus scirpaceus	0
702	2022-07-24	Postnuptial	Estuary	Villaviciosa estuary	Capture	3Y04586	Acrocephalus scirpaceus	0
703	2022-07-24	Postnuptial	Estuary	Villaviciosa estuary	Capture	3Y04589	Acrocephalus scirpaceus	0
704	2022-07-24	Postnuptial	Estuary	Villaviciosa estuary	Capture	3Y04597	Acrocephalus scirpaceus	0
705	2022-07-24	Postnuptial	Estuary	Villaviciosa estuary	Capture	3Y04598	Acrocephalus scirpaceus	0
706	2022-07-24	Postnuptial	Estuary	Villaviciosa estuary	Capture	3Y04607	Acrocephalus scirpaceus	0
707	2022-07-24	Postnuptial	Estuary	Villaviciosa estuary	Capture	3Y04609	Acrocephalus scirpaceus	0
708	2022-07-24	Postnuptial	Estuary	Villaviciosa estuary	Capture	3Y04610	Acrocephalus scirpaceus	0
709	2022-07-24	Postnuptial	Estuary	Villaviciosa estuary	Capture	3Y04612	Acrocephalus scirpaceus	0
710	2022-07-24	Postnuptial	Estuary	Villaviciosa estuary	ReCapture	4Y02997	Acrocephalus scirpaceus	0
711	2022-07-24	Postnuptial	Estuary	Villaviciosa estuary	Capture	3KA71682	Chloris chloris	0
712	2022-07-24	Postnuptial	Estuary	Villaviciosa estuary	Capture	4Z00922	Cisticola juncidis	0
713	2022-07-24	Postnuptial	Estuary	Villaviciosa estuary	Capture	L36465	Lanius collurio	0
714	2022-07-24	Postnuptial	Estuary	Villaviciosa estuary	Capture	4Z00923	Phylloscopus ibericus	0
715	2022-07-31	Postnuptial	Estuary	Villaviciosa estuary	Capture	3Y04641	Acrocephalus schoenobaenus	0
716	2022-07-31	Postnuptial	Estuary	Villaviciosa estuary	Capture	3Y04644	Acrocephalus schoenobaenus	0
717	2022-07-31	Postnuptial	Estuary	Villaviciosa estuary	Capture	3Y04647	Acrocephalus schoenobaenus	0
718	2022-07-31	Postnuptial	Estuary	Villaviciosa estuary	Capture	3Y04648	Acrocephalus schoenobaenus	0
719	2022-07-31	Postnuptial	Estuary	Villaviciosa estuary	Capture	3Y04649	Acrocephalus schoenobaenus	0
720	2022-07-31	Postnuptial	Estuary	Villaviciosa estuary	Capture	3Y04651	Acrocephalus schoenobaenus	0
721	2022-07-31	Postnuptial	Estuary	Villaviciosa estuary	Capture	3Y04652	Acrocephalus schoenobaenus	0
722	2022-07-31	Postnuptial	Estuary	Villaviciosa estuary	Capture	3Y04655	Acrocephalus schoenobaenus	0
723	2022-07-31	Postnuptial	Estuary	Villaviciosa estuary	Capture	3Y04656	Acrocephalus schoenobaenus	0
724	2022-07-31	Postnuptial	Estuary	Villaviciosa estuary	Capture	3Y04657	Acrocephalus schoenobaenus	0
725	2022-07-31	Postnuptial	Estuary	Villaviciosa estuary	Capture	3Y04658	Acrocephalus schoenobaenus	0
726	2022-07-31	Postnuptial	Estuary	Villaviciosa estuary	Capture	3Y04659	Acrocephalus schoenobaenus	0
727	2022-07-31	Postnuptial	Estuary	Villaviciosa estuary	Capture	3Y04660	Acrocephalus schoenobaenus	0
728	2022-07-31	Postnuptial	Estuary	Villaviciosa estuary	Capture	3Y04661	Acrocephalus schoenobaenus	0
729	2022-07-31	Postnuptial	Estuary	Villaviciosa estuary	Capture	3Y04662	Acrocephalus schoenobaenus	0
730	2022-07-31	Postnuptial	Estuary	Villaviciosa estuary	Capture	3Y04663	Acrocephalus schoenobaenus	0
731	2022-07-31	Postnuptial	Estuary	Villaviciosa estuary	Capture	3Y04664	Acrocephalus schoenobaenus	0
732	2022-07-31	Postnuptial	Estuary	Villaviciosa estuary	Capture	3Y04665	Acrocephalus schoenobaenus	0
733	2022-07-31	Postnuptial	Estuary	Villaviciosa estuary	Capture	3Y04666	Acrocephalus schoenobaenus	0
734	2022-07-31	Postnuptial	Estuary	Villaviciosa estuary	Capture	3Y04667	Acrocephalus schoenobaenus	0
735	2022-07-31	Postnuptial	Estuary	Villaviciosa estuary	Capture	3Y04668	Acrocephalus schoenobaenus	0
736	2022-07-31	Postnuptial	Estuary	Villaviciosa estuary	Capture	3Y04671	Acrocephalus schoenobaenus	0
737	2022-07-31	Postnuptial	Estuary	Villaviciosa estuary	Capture	3Y04672	Acrocephalus schoenobaenus	0
738	2022-07-31	Postnuptial	Estuary	Villaviciosa estuary	Control	3Y04602	Acrocephalus schoenobaenus	0
739	2022-07-31	Postnuptial	Estuary	Villaviciosa estuary	Control	3Y04606	Acrocephalus schoenobaenus	0
740	2022-07-31	Postnuptial	Estuary	Villaviciosa estuary	Control	3Y04578	Acrocephalus schoenobaenus	0
741	2022-07-31	Postnuptial	Estuary	Villaviciosa estuary	Control	3Y04520	Acrocephalus schoenobaenus	0
742	2022-07-31	Postnuptial	Estuary	Villaviciosa estuary	Capture	3Y04645	Acrocephalus scirpaceus	0
743	2022-07-31	Postnuptial	Estuary	Villaviciosa estuary	Capture	3Y04646	Acrocephalus scirpaceus	0
744	2022-07-31	Postnuptial	Estuary	Villaviciosa estuary	Capture	3Y04650	Acrocephalus scirpaceus	0
745	2022-07-31	Postnuptial	Estuary	Villaviciosa estuary	Capture	3Y04653	Acrocephalus scirpaceus	0
746	2022-07-31	Postnuptial	Estuary	Villaviciosa estuary	Capture	3Y04654	Acrocephalus scirpaceus	0
747	2022-07-31	Postnuptial	Estuary	Villaviciosa estuary	Capture	4Z00927	Cisticola juncidis	0
748	2022-07-31	Postnuptial	Estuary	Villaviciosa estuary	Capture	4Z00928	Cisticola juncidis	0
749	2022-07-31	Postnuptial	Estuary	Villaviciosa estuary	Capture	L36467	Lanius collurio	0
750	2022-07-31	Postnuptial	Estuary	Villaviciosa estuary	Capture	3KA71684	Passer domesticus	0
751	2022-07-31	Postnuptial	Estuary	Villaviciosa estuary	Capture	3Y04642	Saxicola rubicola	0
752	2022-07-31	Postnuptial	Estuary	Villaviciosa estuary	Capture	3Y04643	Saxicola rubicola	0
753	2022-07-31	Postnuptial	Estuary	Villaviciosa estuary	Capture	3Y04669	Saxicola rubicola	0
754	2022-07-31	Postnuptial	Estuary	Villaviciosa estuary	Capture	3Y04670	Saxicola rubicola	0
755	2022-08-07	Postnuptial	Estuary	Villaviciosa estuary	Capture	3Y04706	Acrocephalus schoenobaenus	0
756	2022-08-07	Postnuptial	Estuary	Villaviciosa estuary	Capture	3Y04707	Acrocephalus schoenobaenus	0
757	2022-08-07	Postnuptial	Estuary	Villaviciosa estuary	Capture	3Y04708	Acrocephalus schoenobaenus	0
758	2022-08-07	Postnuptial	Estuary	Villaviciosa estuary	Capture	3Y04709	Acrocephalus schoenobaenus	0
759	2022-08-07	Postnuptial	Estuary	Villaviciosa estuary	Capture	3Y04710	Acrocephalus schoenobaenus	0
760	2022-08-07	Postnuptial	Estuary	Villaviciosa estuary	Capture	3Y04711	Acrocephalus schoenobaenus	0
761	2022-08-07	Postnuptial	Estuary	Villaviciosa estuary	Capture	3Y04712	Acrocephalus schoenobaenus	0
762	2022-08-07	Postnuptial	Estuary	Villaviciosa estuary	Capture	3Y04713	Acrocephalus schoenobaenus	0
763	2022-08-07	Postnuptial	Estuary	Villaviciosa estuary	Capture	3Y04714	Acrocephalus schoenobaenus	0
764	2022-08-07	Postnuptial	Estuary	Villaviciosa estuary	Capture	3Y04715	Acrocephalus schoenobaenus	0
765	2022-08-07	Postnuptial	Estuary	Villaviciosa estuary	Capture	3Y04716	Acrocephalus schoenobaenus	0
766	2022-08-07	Postnuptial	Estuary	Villaviciosa estuary	Capture	3Y04717	Acrocephalus schoenobaenus	0
767	2022-08-07	Postnuptial	Estuary	Villaviciosa estuary	Capture	3Y04718	Acrocephalus schoenobaenus	0
768	2022-08-07	Postnuptial	Estuary	Villaviciosa estuary	Capture	3Y04719	Acrocephalus schoenobaenus	0
769	2022-08-07	Postnuptial	Estuary	Villaviciosa estuary	Capture	3Y04720	Acrocephalus schoenobaenus	0
770	2022-08-07	Postnuptial	Estuary	Villaviciosa estuary	Capture	3Y04721	Acrocephalus schoenobaenus	0
771	2022-08-07	Postnuptial	Estuary	Villaviciosa estuary	Capture	3Y04722	Acrocephalus schoenobaenus	0
772	2022-08-07	Postnuptial	Estuary	Villaviciosa estuary	Capture	3Y04723	Acrocephalus schoenobaenus	0
773	2022-08-07	Postnuptial	Estuary	Villaviciosa estuary	Capture	3Y04725	Acrocephalus schoenobaenus	0
774	2022-08-07	Postnuptial	Estuary	Villaviciosa estuary	Capture	3Y04726	Acrocephalus schoenobaenus	0
775	2022-08-07	Postnuptial	Estuary	Villaviciosa estuary	Capture	3Y04727	Acrocephalus schoenobaenus	0
776	2022-08-07	Postnuptial	Estuary	Villaviciosa estuary	Capture	3Y04728	Acrocephalus schoenobaenus	0
777	2022-08-07	Postnuptial	Estuary	Villaviciosa estuary	Capture	3Y04729	Acrocephalus schoenobaenus	0
778	2022-08-07	Postnuptial	Estuary	Villaviciosa estuary	Capture	3Y04730	Acrocephalus schoenobaenus	0
779	2022-08-07	Postnuptial	Estuary	Villaviciosa estuary	Capture	3Y04731	Acrocephalus schoenobaenus	0
780	2022-08-07	Postnuptial	Estuary	Villaviciosa estuary	Capture	3Y04733	Acrocephalus schoenobaenus	0
781	2022-08-07	Postnuptial	Estuary	Villaviciosa estuary	Capture	3Y04735	Acrocephalus schoenobaenus	0
782	2022-08-07	Postnuptial	Estuary	Villaviciosa estuary	Capture	3Y04736	Acrocephalus schoenobaenus	0
783	2022-08-07	Postnuptial	Estuary	Villaviciosa estuary	Capture	3Y04737	Acrocephalus schoenobaenus	0
784	2022-08-07	Postnuptial	Estuary	Villaviciosa estuary	Capture	3Y04738	Acrocephalus schoenobaenus	0
785	2022-08-07	Postnuptial	Estuary	Villaviciosa estuary	Capture	3Y04739	Acrocephalus schoenobaenus	0
786	2022-08-07	Postnuptial	Estuary	Villaviciosa estuary	Capture	3Y04740	Acrocephalus schoenobaenus	0
787	2022-08-07	Postnuptial	Estuary	Villaviciosa estuary	Capture	3Y04741	Acrocephalus schoenobaenus	0
788	2022-08-07	Postnuptial	Estuary	Villaviciosa estuary	Capture	3Y04745	Acrocephalus schoenobaenus	0
789	2022-08-07	Postnuptial	Estuary	Villaviciosa estuary	Capture	3Y04746	Acrocephalus schoenobaenus	0
790	2022-08-07	Postnuptial	Estuary	Villaviciosa estuary	Capture	3Y04747	Acrocephalus schoenobaenus	0
791	2022-08-07	Postnuptial	Estuary	Villaviciosa estuary	Capture	3Y04748	Acrocephalus schoenobaenus	0
792	2022-08-07	Postnuptial	Estuary	Villaviciosa estuary	Capture	3Y04749	Acrocephalus schoenobaenus	0
793	2022-08-07	Postnuptial	Estuary	Villaviciosa estuary	Capture	3Y04750	Acrocephalus schoenobaenus	0
794	2022-08-07	Postnuptial	Estuary	Villaviciosa estuary	Control	3Y04535	Acrocephalus schoenobaenus	0
795	2022-08-07	Postnuptial	Estuary	Villaviciosa estuary	Control	3Y04660	Acrocephalus schoenobaenus	0
796	2022-08-07	Postnuptial	Estuary	Villaviciosa estuary	Control	3Y04663	Acrocephalus schoenobaenus	0
797	2022-08-07	Postnuptial	Estuary	Villaviciosa estuary	Recovery	1740016	Acrocephalus schoenobaenus	0
798	2022-08-07	Postnuptial	Estuary	Villaviciosa estuary	Recovery	1733574	Acrocephalus schoenobaenus	0
799	2022-08-07	Postnuptial	Estuary	Villaviciosa estuary	Capture	3Y04734	Acrocephalus scirpaceus	0
800	2022-08-07	Postnuptial	Estuary	Villaviciosa estuary	Capture	3Y04742	Acrocephalus scirpaceus	0
801	2022-08-07	Postnuptial	Estuary	Villaviciosa estuary	Capture	3Y04743	Acrocephalus scirpaceus	0
802	2022-08-07	Postnuptial	Estuary	Villaviciosa estuary	Capture	3Y04744	Acrocephalus scirpaceus	0
803	2022-08-07	Postnuptial	Estuary	Villaviciosa estuary	Control	3Y04645	Acrocephalus scirpaceus	0
804	2022-08-07	Postnuptial	Estuary	Villaviciosa estuary	Capture	4Z00936	Cisticola juncidis	0
805	2022-08-07	Postnuptial	Estuary	Villaviciosa estuary	Capture	4Z00933	Phylloscopus trochilus	0
806	2022-08-07	Postnuptial	Estuary	Villaviciosa estuary	Capture	4Z00934	Phylloscopus trochilus	0
807	2022-08-07	Postnuptial	Estuary	Villaviciosa estuary	Capture	4Z00935	Phylloscopus trochilus	0
808	2022-08-07	Postnuptial	Estuary	Villaviciosa estuary	Capture	4Z00937	Phylloscopus trochilus	0
809	2022-08-07	Postnuptial	Estuary	Villaviciosa estuary	Capture	3Y04724	Saxicola rubicola	0
810	2022-08-07	Postnuptial	Estuary	Villaviciosa estuary	Capture	3Y04732	Saxicola rubicola	0
811	2022-08-07	Postnuptial	Estuary	Villaviciosa estuary	Control	3Y04670	Saxicola rubicola	0
812	2022-08-07	Postnuptial	Estuary	Villaviciosa estuary	Capture	3KA71686	Sylvia communis	0
813	2022-08-14	Postnuptial	Estuary	Villaviciosa estuary	Capture	3Y04782	Acrocephalus paludicola	0
814	2022-08-14	Postnuptial	Estuary	Villaviciosa estuary	Capture	3Y04786	Acrocephalus paludicola	0
815	2022-08-14	Postnuptial	Estuary	Villaviciosa estuary	Capture	3Y04772	Acrocephalus schoenobaenus	0
816	2022-08-14	Postnuptial	Estuary	Villaviciosa estuary	Capture	3Y04773	Acrocephalus schoenobaenus	0
817	2022-08-14	Postnuptial	Estuary	Villaviciosa estuary	Capture	3Y04774	Acrocephalus schoenobaenus	0
818	2022-08-14	Postnuptial	Estuary	Villaviciosa estuary	Capture	3Y04775	Acrocephalus schoenobaenus	0
819	2022-08-14	Postnuptial	Estuary	Villaviciosa estuary	Capture	3Y04776	Acrocephalus schoenobaenus	0
820	2022-08-14	Postnuptial	Estuary	Villaviciosa estuary	Capture	3Y04777	Acrocephalus schoenobaenus	0
821	2022-08-14	Postnuptial	Estuary	Villaviciosa estuary	Capture	3Y04778	Acrocephalus schoenobaenus	0
822	2022-08-14	Postnuptial	Estuary	Villaviciosa estuary	Capture	3Y04780	Acrocephalus schoenobaenus	0
823	2022-08-14	Postnuptial	Estuary	Villaviciosa estuary	Capture	3Y04781	Acrocephalus schoenobaenus	0
824	2022-08-14	Postnuptial	Estuary	Villaviciosa estuary	Capture	3Y04783	Acrocephalus schoenobaenus	0
825	2022-08-14	Postnuptial	Estuary	Villaviciosa estuary	Capture	3Y04785	Acrocephalus schoenobaenus	0
826	2022-08-14	Postnuptial	Estuary	Villaviciosa estuary	Capture	3Y04787	Acrocephalus schoenobaenus	0
827	2022-08-14	Postnuptial	Estuary	Villaviciosa estuary	Capture	3Y04788	Acrocephalus schoenobaenus	0
828	2022-08-14	Postnuptial	Estuary	Villaviciosa estuary	Capture	3Y04789	Acrocephalus schoenobaenus	0
829	2022-08-14	Postnuptial	Estuary	Villaviciosa estuary	Capture	3Y04790	Acrocephalus schoenobaenus	0
830	2022-08-14	Postnuptial	Estuary	Villaviciosa estuary	Capture	3Y04779	Acrocephalus scirpaceus	0
831	2022-08-14	Postnuptial	Estuary	Villaviciosa estuary	Capture	3Y04791	Acrocephalus scirpaceus	0
832	2022-08-14	Postnuptial	Estuary	Villaviciosa estuary	Control	3Y04586	Acrocephalus scirpaceus	0
833	2022-08-14	Postnuptial	Estuary	Villaviciosa estuary	ReCapture	3Y96864	Acrocephalus scirpaceus	0
834	2022-08-14	Postnuptial	Estuary	Villaviciosa estuary	ReCapture	4Y02992	Acrocephalus scirpaceus	0
835	2022-08-14	Postnuptial	Estuary	Villaviciosa estuary	ReCapture	3Y96861	Acrocephalus scirpaceus	0
836	2022-08-14	Postnuptial	Estuary	Villaviciosa estuary	Capture	4Z00940	Cisticola juncidis	0
837	2022-08-14	Postnuptial	Estuary	Villaviciosa estuary	Capture	4Z00941	Cisticola juncidis	0
838	2022-08-14	Postnuptial	Estuary	Villaviciosa estuary	Capture	4Z00942	Cisticola juncidis	0
839	2022-08-14	Postnuptial	Estuary	Villaviciosa estuary	Control	3Z00986	Cisticola juncidis	0
840	2022-08-14	Postnuptial	Estuary	Villaviciosa estuary	Capture	3Y04792	Hirundo rustica	0
841	2022-08-14	Postnuptial	Estuary	Villaviciosa estuary	Capture	3Y04784	Locustella naevia	0
842	2022-08-14	Postnuptial	Estuary	Villaviciosa estuary	Capture	4Z00939	Phylloscopus trochilus	0
843	2022-08-21	Postnuptial	Estuary	Villaviciosa estuary	Capture	3Y04814	Acrocephalus schoenobaenus	0
844	2022-08-21	Postnuptial	Estuary	Villaviciosa estuary	Capture	3Y04815	Acrocephalus schoenobaenus	0
845	2022-08-21	Postnuptial	Estuary	Villaviciosa estuary	Capture	3Y04818	Acrocephalus schoenobaenus	0
846	2022-08-21	Postnuptial	Estuary	Villaviciosa estuary	Capture	3Y04819	Acrocephalus schoenobaenus	0
847	2022-08-21	Postnuptial	Estuary	Villaviciosa estuary	Capture	3Y04820	Acrocephalus schoenobaenus	0
848	2022-08-21	Postnuptial	Estuary	Villaviciosa estuary	Capture	3Y04821	Acrocephalus schoenobaenus	0
849	2022-08-21	Postnuptial	Estuary	Villaviciosa estuary	Capture	3Y04822	Acrocephalus schoenobaenus	0
850	2022-08-21	Postnuptial	Estuary	Villaviciosa estuary	Capture	3Y04825	Acrocephalus schoenobaenus	0
851	2022-08-21	Postnuptial	Estuary	Villaviciosa estuary	Capture	3Y04826	Acrocephalus schoenobaenus	0
852	2022-08-21	Postnuptial	Estuary	Villaviciosa estuary	Capture	3Y04829	Acrocephalus schoenobaenus	0
853	2022-08-21	Postnuptial	Estuary	Villaviciosa estuary	Control	3Y04775	Acrocephalus schoenobaenus	0
854	2022-08-21	Postnuptial	Estuary	Villaviciosa estuary	Control	3Y04586	Acrocephalus scirpaceus	0
855	2022-08-21	Postnuptial	Estuary	Villaviciosa estuary	Capture	4Z00944	Cisticola juncidis	0
856	2022-08-21	Postnuptial	Estuary	Villaviciosa estuary	Capture	4Z00945	Cisticola juncidis	0
857	2022-08-21	Postnuptial	Estuary	Villaviciosa estuary	Capture	4Z00946	Cisticola juncidis	0
858	2022-08-21	Postnuptial	Estuary	Villaviciosa estuary	Capture	4Z00949	Cisticola juncidis	0
859	2022-08-21	Postnuptial	Estuary	Villaviciosa estuary	Capture	4Z00947	Hirundo rustica	0
860	2022-08-21	Postnuptial	Estuary	Villaviciosa estuary	Capture	3Y04830	Hirundo rustica	0
861	2022-08-21	Postnuptial	Estuary	Villaviciosa estuary	Capture	3Y04831	Hirundo rustica	0
862	2022-08-21	Postnuptial	Estuary	Villaviciosa estuary	Capture	3Y04833	Hirundo rustica	0
863	2022-08-21	Postnuptial	Estuary	Villaviciosa estuary	Capture	3Y04834	Hirundo rustica	0
864	2022-08-21	Postnuptial	Estuary	Villaviciosa estuary	Capture	3Y04835	Hirundo rustica	0
865	2022-08-21	Postnuptial	Estuary	Villaviciosa estuary	Capture	3Y04836	Hirundo rustica	0
866	2022-08-21	Postnuptial	Estuary	Villaviciosa estuary	Capture	3Y04839	Hirundo rustica	0
867	2022-08-21	Postnuptial	Estuary	Villaviciosa estuary	Capture	3Y04840	Hirundo rustica	0
868	2022-08-21	Postnuptial	Estuary	Villaviciosa estuary	Capture	3Y04816	Luscinia svecica	0
869	2022-08-21	Postnuptial	Estuary	Villaviciosa estuary	Capture	3Y04817	Luscinia svecica	0
870	2022-08-21	Postnuptial	Estuary	Villaviciosa estuary	Capture	3Y04827	Luscinia svecica	0
871	2022-08-21	Postnuptial	Estuary	Villaviciosa estuary	Capture	3Y04832	Luscinia svecica	0
872	2022-08-21	Postnuptial	Estuary	Villaviciosa estuary	Capture	3Y04842	Luscinia svecica	0
873	2022-08-21	Postnuptial	Estuary	Villaviciosa estuary	Capture	3Y04823	Motacilla flava	0
874	2022-08-21	Postnuptial	Estuary	Villaviciosa estuary	Capture	3Y04824	Motacilla flava	0
875	2022-08-21	Postnuptial	Estuary	Villaviciosa estuary	Capture	4Z00943	Phylloscopus trochilus	0
876	2022-08-21	Postnuptial	Estuary	Villaviciosa estuary	Capture	4Z00948	Phylloscopus trochilus	0
877	2022-08-21	Postnuptial	Estuary	Villaviciosa estuary	Capture	4Z00950	Phylloscopus trochilus	0
878	2022-08-21	Postnuptial	Estuary	Villaviciosa estuary	Capture	3Y04828	Saxicola rubicola	0
879	2022-08-21	Postnuptial	Estuary	Villaviciosa estuary	Capture	3Y04837	Saxicola rubicola	0
880	2022-08-21	Postnuptial	Estuary	Villaviciosa estuary	Capture	3Y04838	Saxicola rubicola	0
881	2022-08-21	Postnuptial	Estuary	Villaviciosa estuary	Capture	3Y04841	Saxicola rubicola	0
882	2022-08-28	Postnuptial	Estuary	Villaviciosa estuary	Capture	3Y04929	Acrocephalus schoenobaenus	0
883	2022-08-28	Postnuptial	Estuary	Villaviciosa estuary	Capture	3Y04930	Acrocephalus schoenobaenus	0
884	2022-08-28	Postnuptial	Estuary	Villaviciosa estuary	Capture	3Y04931	Acrocephalus schoenobaenus	0
885	2022-08-28	Postnuptial	Estuary	Villaviciosa estuary	Capture	3Y04932	Acrocephalus schoenobaenus	0
886	2022-08-28	Postnuptial	Estuary	Villaviciosa estuary	Capture	3Y04933	Acrocephalus schoenobaenus	0
887	2022-08-28	Postnuptial	Estuary	Villaviciosa estuary	Capture	3Y04934	Acrocephalus schoenobaenus	0
888	2022-08-28	Postnuptial	Estuary	Villaviciosa estuary	Capture	3Y04935	Acrocephalus schoenobaenus	0
889	2022-08-28	Postnuptial	Estuary	Villaviciosa estuary	Capture	3Y04939	Acrocephalus schoenobaenus	0
890	2022-08-28	Postnuptial	Estuary	Villaviciosa estuary	Capture	3Y04945	Acrocephalus schoenobaenus	0
891	2022-08-28	Postnuptial	Estuary	Villaviciosa estuary	Capture	3Y04946	Acrocephalus schoenobaenus	0
892	2022-08-28	Postnuptial	Estuary	Villaviciosa estuary	Capture	3Y04947	Acrocephalus schoenobaenus	0
893	2022-08-28	Postnuptial	Estuary	Villaviciosa estuary	Capture	3Y04948	Acrocephalus schoenobaenus	0
894	2022-08-28	Postnuptial	Estuary	Villaviciosa estuary	Capture	3Y04954	Acrocephalus schoenobaenus	0
895	2022-08-28	Postnuptial	Estuary	Villaviciosa estuary	Capture	3Y04955	Acrocephalus schoenobaenus	0
896	2022-08-28	Postnuptial	Estuary	Villaviciosa estuary	Control	3Y04825	Acrocephalus schoenobaenus	0
897	2022-08-28	Postnuptial	Estuary	Villaviciosa estuary	Recovery	17621199	Acrocephalus schoenobaenus	0
898	2022-08-28	Postnuptial	Estuary	Villaviciosa estuary	Recovery	AKT8312	Acrocephalus schoenobaenus	0
899	2022-08-28	Postnuptial	Estuary	Villaviciosa estuary	Capture	3Y04936	Acrocephalus scirpaceus	0
900	2022-08-28	Postnuptial	Estuary	Villaviciosa estuary	Capture	3Y04940	Acrocephalus scirpaceus	0
901	2022-08-28	Postnuptial	Estuary	Villaviciosa estuary	Capture	3Y04941	Acrocephalus scirpaceus	0
902	2022-08-28	Postnuptial	Estuary	Villaviciosa estuary	Capture	3Y04942	Acrocephalus scirpaceus	0
903	2022-08-28	Postnuptial	Estuary	Villaviciosa estuary	Capture	3Y04950	Acrocephalus scirpaceus	0
904	2022-08-28	Postnuptial	Estuary	Villaviciosa estuary	Capture	3Y04953	Acrocephalus scirpaceus	0
905	2022-08-28	Postnuptial	Estuary	Villaviciosa estuary	Capture	3Y04956	Acrocephalus scirpaceus	0
906	2022-08-28	Postnuptial	Estuary	Villaviciosa estuary	Capture	3Y04957	Acrocephalus scirpaceus	0
907	2022-08-28	Postnuptial	Estuary	Villaviciosa estuary	Capture	3Y04958	Acrocephalus scirpaceus	0
908	2022-08-28	Postnuptial	Estuary	Villaviciosa estuary	Recovery	16902702	Acrocephalus scirpaceus	0
909	2022-08-28	Postnuptial	Estuary	Villaviciosa estuary	Capture	L36468	Lanius collurio	0
910	2022-08-28	Postnuptial	Estuary	Villaviciosa estuary	Capture	3Y04938	Luscinia svecica	0
911	2022-08-28	Postnuptial	Estuary	Villaviciosa estuary	Capture	3Y04944	Luscinia svecica	0
912	2022-08-28	Postnuptial	Estuary	Villaviciosa estuary	Capture	3Y04949	Luscinia svecica	0
913	2022-08-28	Postnuptial	Estuary	Villaviciosa estuary	Capture	4Z00965	Phylloscopus trochilus	0
914	2022-08-28	Postnuptial	Estuary	Villaviciosa estuary	Capture	4Z00966	Phylloscopus trochilus	0
915	2022-08-28	Postnuptial	Estuary	Villaviciosa estuary	Capture	4Z00967	Phylloscopus trochilus	0
916	2022-08-28	Postnuptial	Estuary	Villaviciosa estuary	Capture	4Z00968	Phylloscopus trochilus	0
917	2022-08-28	Postnuptial	Estuary	Villaviciosa estuary	Capture	4Z00969	Phylloscopus trochilus	0
918	2022-08-28	Postnuptial	Estuary	Villaviciosa estuary	Capture	4Z00970	Phylloscopus trochilus	0
919	2022-08-28	Postnuptial	Estuary	Villaviciosa estuary	Capture	4Z00971	Phylloscopus trochilus	0
920	2022-08-28	Postnuptial	Estuary	Villaviciosa estuary	Capture	3Y04937	Saxicola rubetra	0
921	2022-08-28	Postnuptial	Estuary	Villaviciosa estuary	Capture	3Y04943	Saxicola rubetra	0
922	2022-08-28	Postnuptial	Estuary	Villaviciosa estuary	Capture	3Y04959	Saxicola rubetra	0
923	2022-08-28	Postnuptial	Estuary	Villaviciosa estuary	Capture	3Y04951	Saxicola rubicola	0
924	2022-08-28	Postnuptial	Estuary	Villaviciosa estuary	Capture	3Y04952	Saxicola rubicola	0
925	2022-08-28	Postnuptial	Estuary	Villaviciosa estuary	Control	3Y04732	Saxicola rubicola	0
926	2022-08-28	Postnuptial	Estuary	Villaviciosa estuary	Capture	3KA71698	Sylvia communis	0
927	2022-08-28	Postnuptial	Estuary	Villaviciosa estuary	Capture	3KA71699	Sylvia communis	0
928	2022-09-04	Postnuptial	Estuary	Villaviciosa estuary	Capture	3Y04982	Acrocephalus schoenobaenus	0
929	2022-09-04	Postnuptial	Estuary	Villaviciosa estuary	Capture	3Y04984	Acrocephalus schoenobaenus	0
930	2022-09-04	Postnuptial	Estuary	Villaviciosa estuary	Capture	3Y04986	Acrocephalus schoenobaenus	0
931	2022-09-04	Postnuptial	Estuary	Villaviciosa estuary	Capture	3Y04987	Acrocephalus schoenobaenus	0
932	2022-09-04	Postnuptial	Estuary	Villaviciosa estuary	Capture	3Y04990	Acrocephalus schoenobaenus	0
933	2022-09-04	Postnuptial	Estuary	Villaviciosa estuary	Capture	3Y04994	Acrocephalus schoenobaenus	0
934	2022-09-04	Postnuptial	Estuary	Villaviciosa estuary	Capture	3Y04995	Acrocephalus schoenobaenus	0
935	2022-09-04	Postnuptial	Estuary	Villaviciosa estuary	Capture	3Y04997	Acrocephalus schoenobaenus	0
936	2022-09-04	Postnuptial	Estuary	Villaviciosa estuary	Control	3Y04932	Acrocephalus schoenobaenus	0
937	2022-09-04	Postnuptial	Estuary	Villaviciosa estuary	Control	3Y04935	Acrocephalus schoenobaenus	0
938	2022-09-04	Postnuptial	Estuary	Villaviciosa estuary	Capture	3Y04991	Acrocephalus scirpaceus	0
939	2022-09-04	Postnuptial	Estuary	Villaviciosa estuary	Capture	3Y04996	Acrocephalus scirpaceus	0
940	2022-09-04	Postnuptial	Estuary	Villaviciosa estuary	Capture	4Z00976	Cisticola juncidis	0
941	2022-09-04	Postnuptial	Estuary	Villaviciosa estuary	Capture	4Z00977	Cisticola juncidis	0
942	2022-09-04	Postnuptial	Estuary	Villaviciosa estuary	Capture	4Z00978	Cisticola juncidis	0
943	2022-09-04	Postnuptial	Estuary	Villaviciosa estuary	Capture	3Y04989	Locustella naevia	0
944	2022-09-04	Postnuptial	Estuary	Villaviciosa estuary	Capture	3Y04983	Luscinia svecica	0
945	2022-09-04	Postnuptial	Estuary	Villaviciosa estuary	Capture	3Y04985	Luscinia svecica	0
946	2022-09-04	Postnuptial	Estuary	Villaviciosa estuary	Capture	3Y04988	Luscinia svecica	0
947	2022-09-04	Postnuptial	Estuary	Villaviciosa estuary	Capture	3Y04993	Luscinia svecica	0
948	2022-09-04	Postnuptial	Estuary	Villaviciosa estuary	Capture	3KA81605	Passer domesticus	0
949	2022-09-04	Postnuptial	Estuary	Villaviciosa estuary	Capture	4Z00979	Phylloscopus trochilus	0
950	2022-09-04	Postnuptial	Estuary	Villaviciosa estuary	Capture	4Z00980	Phylloscopus trochilus	0
951	2022-09-04	Postnuptial	Estuary	Villaviciosa estuary	Capture	3Y04981	Saxicola rubetra	0
952	2022-09-04	Postnuptial	Estuary	Villaviciosa estuary	Capture	3Y04992	Saxicola rubicola	0
953	2022-09-04	Postnuptial	Estuary	Villaviciosa estuary	Capture	3KA81604	Sylvia communis	0
954	2022-09-11	Postnuptial	Estuary	Villaviciosa estuary	Capture	5Y16518	Acrocephalus schoenobaenus	0
955	2022-09-11	Postnuptial	Estuary	Villaviciosa estuary	Capture	5Y16519	Acrocephalus schoenobaenus	0
956	2022-09-11	Postnuptial	Estuary	Villaviciosa estuary	Capture	5Y16523	Acrocephalus schoenobaenus	0
957	2022-09-11	Postnuptial	Estuary	Villaviciosa estuary	Capture	5Y16524	Acrocephalus schoenobaenus	0
958	2022-09-11	Postnuptial	Estuary	Villaviciosa estuary	Control	5Y04932	Acrocephalus schoenobaenus	0
959	2022-09-11	Postnuptial	Estuary	Villaviciosa estuary	Capture	5Y16514	Acrocephalus scirpaceus	0
960	2022-09-11	Postnuptial	Estuary	Villaviciosa estuary	Capture	5Y16515	Acrocephalus scirpaceus	0
961	2022-09-11	Postnuptial	Estuary	Villaviciosa estuary	Capture	5Y16520	Acrocephalus scirpaceus	0
962	2022-09-11	Postnuptial	Estuary	Villaviciosa estuary	Capture	5Y16516	Cettia cetti	0
963	2022-09-11	Postnuptial	Estuary	Villaviciosa estuary	Capture	5Y16521	Cettia cetti	0
964	2022-09-11	Postnuptial	Estuary	Villaviciosa estuary	Capture	4Z00985	Cisticola juncidis	0
965	2022-09-11	Postnuptial	Estuary	Villaviciosa estuary	Capture	5Y16512	Luscinia svecica	0
966	2022-09-11	Postnuptial	Estuary	Villaviciosa estuary	Capture	4Z00986	Phylloscopus trochilus	0
967	2022-09-11	Postnuptial	Estuary	Villaviciosa estuary	Capture		Phylloscopus trochilus	0
968	2022-09-11	Postnuptial	Estuary	Villaviciosa estuary	Capture		Phylloscopus trochilus	0
969	2022-09-11	Postnuptial	Estuary	Villaviciosa estuary	Capture	5Y16517	Saxicola rubetra	0
970	2022-09-11	Postnuptial	Estuary	Villaviciosa estuary	Capture	5Y16522	Saxicola rubicola	0
971	2022-09-18	Postnuptial	Estuary	Villaviciosa estuary	Capture	5Y16547	Acrocephalus schoenobaenus	0
972	2022-09-18	Postnuptial	Estuary	Villaviciosa estuary	Capture	5Y16548	Acrocephalus schoenobaenus	0
973	2022-09-18	Postnuptial	Estuary	Villaviciosa estuary	Capture	5Y16549	Acrocephalus schoenobaenus	0
974	2022-09-18	Postnuptial	Estuary	Villaviciosa estuary	Capture	5Y16555	Acrocephalus schoenobaenus	0
975	2022-09-18	Postnuptial	Estuary	Villaviciosa estuary	Capture	5Y16560	Acrocephalus schoenobaenus	0
976	2022-09-18	Postnuptial	Estuary	Villaviciosa estuary	Capture	5Y16563	Acrocephalus schoenobaenus	0
977	2022-09-18	Postnuptial	Estuary	Villaviciosa estuary	Capture	5Y16564	Acrocephalus schoenobaenus	0
978	2022-09-18	Postnuptial	Estuary	Villaviciosa estuary	Capture	5Y16543	Acrocephalus scirpaceus	0
979	2022-09-18	Postnuptial	Estuary	Villaviciosa estuary	Capture	5Y16544	Acrocephalus scirpaceus	0
980	2022-09-18	Postnuptial	Estuary	Villaviciosa estuary	Capture	5Y16550	Acrocephalus scirpaceus	0
981	2022-09-18	Postnuptial	Estuary	Villaviciosa estuary	Capture	5Y16551	Acrocephalus scirpaceus	0
982	2022-09-18	Postnuptial	Estuary	Villaviciosa estuary	Capture	5Y16556	Acrocephalus scirpaceus	0
983	2022-09-18	Postnuptial	Estuary	Villaviciosa estuary	Capture	5Y16558	Acrocephalus scirpaceus	0
984	2022-09-18	Postnuptial	Estuary	Villaviciosa estuary	Capture	5Y16559	Acrocephalus scirpaceus	0
985	2022-09-18	Postnuptial	Estuary	Villaviciosa estuary	Capture	5Y16561	Acrocephalus scirpaceus	0
986	2022-09-18	Postnuptial	Estuary	Villaviciosa estuary	Capture	5Y16562	Acrocephalus scirpaceus	0
987	2022-09-18	Postnuptial	Estuary	Villaviciosa estuary	Capture	5Y16546	Luscinia svecica	0
988	2022-09-18	Postnuptial	Estuary	Villaviciosa estuary	Capture	5Y16552	Luscinia svecica	0
989	2022-09-18	Postnuptial	Estuary	Villaviciosa estuary	Capture	5Y16553	Luscinia svecica	0
990	2022-09-18	Postnuptial	Estuary	Villaviciosa estuary	Capture	4Z00990	Phylloscopus trochilus	0
991	2022-09-18	Postnuptial	Estuary	Villaviciosa estuary	Capture	4Z00991	Phylloscopus trochilus	0
992	2022-09-18	Postnuptial	Estuary	Villaviciosa estuary	Capture	5Y16542	Saxicola rubetra	0
993	2022-09-18	Postnuptial	Estuary	Villaviciosa estuary	Capture	5Y16545	Saxicola rubetra	0
994	2022-09-18	Postnuptial	Estuary	Villaviciosa estuary	Capture	5Y16554	Saxicola rubetra	0
995	2022-09-18	Postnuptial	Estuary	Villaviciosa estuary	Capture	5Y16557	Saxicola rubetra	0
996	2022-09-18	Postnuptial	Estuary	Villaviciosa estuary	Capture	3KA81613	Sylvia atricapilla	0
997	2022-09-25	Postnuptial	Estuary	Villaviciosa estuary	Capture	5Y16583	Acrocephalus schoenobaenus	0
998	2022-09-25	Postnuptial	Estuary	Villaviciosa estuary	Capture	5Y16584	Acrocephalus schoenobaenus	0
999	2022-09-25	Postnuptial	Estuary	Villaviciosa estuary	Capture	5Y16586	Acrocephalus schoenobaenus	0
1000	2022-09-25	Postnuptial	Estuary	Villaviciosa estuary	Capture	5Y16587	Acrocephalus schoenobaenus	0
1001	2022-09-25	Postnuptial	Estuary	Villaviciosa estuary	Capture	5Y16591	Acrocephalus schoenobaenus	0
1002	2022-09-25	Postnuptial	Estuary	Villaviciosa estuary	Capture	5Y16593	Acrocephalus schoenobaenus	0
1003	2022-09-25	Postnuptial	Estuary	Villaviciosa estuary	Capture	5Y16595	Acrocephalus schoenobaenus	0
1004	2022-09-25	Postnuptial	Estuary	Villaviciosa estuary	Capture	5Y16596	Acrocephalus schoenobaenus	0
1005	2022-09-25	Postnuptial	Estuary	Villaviciosa estuary	Control	5Y16563	Acrocephalus schoenobaenus	0
1006	2022-09-25	Postnuptial	Estuary	Villaviciosa estuary	Control	5Y16555	Acrocephalus schoenobaenus	0
1007	2022-09-25	Postnuptial	Estuary	Villaviciosa estuary	Capture	5Y16580	Acrocephalus scirpaceus	0
1008	2022-09-25	Postnuptial	Estuary	Villaviciosa estuary	Capture	5Y16585	Acrocephalus scirpaceus	0
1009	2022-09-25	Postnuptial	Estuary	Villaviciosa estuary	Capture	5Y16588	Acrocephalus scirpaceus	0
1010	2022-09-25	Postnuptial	Estuary	Villaviciosa estuary	Capture	5Y16589	Acrocephalus scirpaceus	0
1011	2022-09-25	Postnuptial	Estuary	Villaviciosa estuary	Capture	5Y16590	Acrocephalus scirpaceus	0
1012	2022-09-25	Postnuptial	Estuary	Villaviciosa estuary	Capture	3KA81615	Passer domesticus	0
1013	2022-09-25	Postnuptial	Estuary	Villaviciosa estuary	Capture	1Z94102	Phylloscopus trochilus	0
1014	2022-09-25	Postnuptial	Estuary	Villaviciosa estuary	Capture	1Z94103	Phylloscopus trochilus	0
1015	2022-09-25	Postnuptial	Estuary	Villaviciosa estuary	Capture	1Z94104	Phylloscopus trochilus	0
1016	2022-09-25	Postnuptial	Estuary	Villaviciosa estuary	Capture	1Z94105	Phylloscopus trochilus	0
1017	2022-09-25	Postnuptial	Estuary	Villaviciosa estuary	Capture	5Y16581	Saxicola rubetra	0
1018	2022-09-25	Postnuptial	Estuary	Villaviciosa estuary	Capture	5Y16582	Saxicola rubetra	0
1019	2022-09-25	Postnuptial	Estuary	Villaviciosa estuary	Capture	5Y16592	Saxicola rubicola	0
1020	2022-09-25	Postnuptial	Estuary	Villaviciosa estuary	Capture	5Y16594	Saxicola rubicola	0
1021	2022-09-25	Postnuptial	Estuary	Villaviciosa estuary	Capture	B99961	Turdus merula	0
1022	2022-10-02	Postnuptial	Estuary	Villaviciosa estuary	Capture	5Y16602	Anthus pratensis	0
1023	2022-10-02	Postnuptial	Estuary	Villaviciosa estuary	Capture	5Y16598	Cettia cetti	0
1024	2022-10-02	Postnuptial	Estuary	Villaviciosa estuary	Capture	5Y16600	Cettia cetti	0
1025	2022-10-02	Postnuptial	Estuary	Villaviciosa estuary	Capture	5Y16597	Erithacus rubecula	0
1026	2022-10-02	Postnuptial	Estuary	Villaviciosa estuary	Capture	5Y16599	Luscinia svecica	0
1027	2022-10-02	Postnuptial	Estuary	Villaviciosa estuary	Capture	5Y16601	Saxicola rubicola	0
1028	2022-10-09	Postnuptial	Estuary	Villaviciosa estuary	Capture	5Y16660	Acrocephalus schoenobaenus	0
1029	2022-10-09	Postnuptial	Estuary	Villaviciosa estuary	Capture	5Y16626	Acrocephalus scirpaceus	1	I. frontalis	larvae	n.a.	fully feed
1030	2022-10-09	Postnuptial	Estuary	Villaviciosa estuary	Capture	5Y16628	Acrocephalus scirpaceus	0
1031	2022-10-09	Postnuptial	Estuary	Villaviciosa estuary	Capture	5Y16629	Acrocephalus scirpaceus	0
1032	2022-10-09	Postnuptial	Estuary	Villaviciosa estuary	Capture	5Y16631	Acrocephalus scirpaceus	0
1033	2022-10-09	Postnuptial	Estuary	Villaviciosa estuary	Capture	5Y16632	Acrocephalus scirpaceus	0
1034	2022-10-09	Postnuptial	Estuary	Villaviciosa estuary	Capture	5Y16633	Acrocephalus scirpaceus	0
1035	2022-10-09	Postnuptial	Estuary	Villaviciosa estuary	Capture	5Y16638	Acrocephalus scirpaceus	0
1036	2022-10-09	Postnuptial	Estuary	Villaviciosa estuary	Capture	5Y16639	Acrocephalus scirpaceus	0
1037	2022-10-09	Postnuptial	Estuary	Villaviciosa estuary	Capture	5Y16640	Acrocephalus scirpaceus	0
1038	2022-10-09	Postnuptial	Estuary	Villaviciosa estuary	Capture	5Y16642	Acrocephalus scirpaceus	1	I. frontalis	larvae	n.a.	fully feed
1039	2022-10-09	Postnuptial	Estuary	Villaviciosa estuary	Capture	5Y16647	Acrocephalus scirpaceus	0
1040	2022-10-09	Postnuptial	Estuary	Villaviciosa estuary	Capture	5Y16648	Acrocephalus scirpaceus	0
1041	2022-10-09	Postnuptial	Estuary	Villaviciosa estuary	Capture	5Y16649	Acrocephalus scirpaceus	0
1042	2022-10-09	Postnuptial	Estuary	Villaviciosa estuary	Capture	5Y16651	Acrocephalus scirpaceus	0
1043	2022-10-09	Postnuptial	Estuary	Villaviciosa estuary	Capture	5Y16652	Acrocephalus scirpaceus	0
1044	2022-10-09	Postnuptial	Estuary	Villaviciosa estuary	Control	5Y16614	Acrocephalus scirpaceus	0
1045	2022-10-09	Postnuptial	Estuary	Villaviciosa estuary	Capture	5Y16627	Anthus pratensis	0
1046	2022-10-09	Postnuptial	Estuary	Villaviciosa estuary	Capture	5Y16630	Anthus pratensis	0
1047	2022-10-09	Postnuptial	Estuary	Villaviciosa estuary	Capture	5Y16637	Anthus pratensis	0
1048	2022-10-09	Postnuptial	Estuary	Villaviciosa estuary	Capture	5Y16644	Anthus pratensis	0
1049	2022-10-09	Postnuptial	Estuary	Villaviciosa estuary	Capture	5Y16645	Anthus pratensis	0
1050	2022-10-09	Postnuptial	Estuary	Villaviciosa estuary	Capture	5Y16646	Anthus pratensis	0
1051	2022-10-09	Postnuptial	Estuary	Villaviciosa estuary	Capture	5Y16650	Anthus pratensis	0
1052	2022-10-09	Postnuptial	Estuary	Villaviciosa estuary	Capture	5Y16653	Anthus pratensis	0
1053	2022-10-09	Postnuptial	Estuary	Villaviciosa estuary	Capture	5Y16654	Anthus pratensis	3	I. frontalis	larvae	n.a.	fully feed
1054	2022-10-09	Postnuptial	Estuary	Villaviciosa estuary	Capture	5Y16655	Anthus pratensis	1	I. ricinus	larvae	n.a.	half feed
1055	2022-10-09	Postnuptial	Estuary	Villaviciosa estuary	Capture	5Y16656	Anthus pratensis	0
1056	2022-10-09	Postnuptial	Estuary	Villaviciosa estuary	Capture	5Y16657	Anthus pratensis	0
1057	2022-10-09	Postnuptial	Estuary	Villaviciosa estuary	Capture	5Y16658	Anthus pratensis	0
1058	2022-10-09	Postnuptial	Estuary	Villaviciosa estuary	Capture	5Y16634	Cettia cetti	0
1059	2022-10-09	Postnuptial	Estuary	Villaviciosa estuary	Capture	1Z94129	Cisticola juncidis	0
1060	2022-10-09	Postnuptial	Estuary	Villaviciosa estuary	Capture	5Y16641	Emberiza schoeniclus	0
1061	2022-10-09	Postnuptial	Estuary	Villaviciosa estuary	Capture	5Y16643	Erithacus rubecula	0
1062	2022-10-09	Postnuptial	Estuary	Villaviciosa estuary	Capture	5Y16635	Luscinia svecica	0
1063	2022-10-09	Postnuptial	Estuary	Villaviciosa estuary	Capture	5Y16636	Luscinia svecica	0
1064	2022-10-09	Postnuptial	Estuary	Villaviciosa estuary	Control	5Y16599	Luscinia svecica	0
1065	2022-10-09	Postnuptial	Estuary	Villaviciosa estuary	Capture	1Z94131	Phylloscopus collybita	0
1066	2022-10-09	Postnuptial	Estuary	Villaviciosa estuary	Capture	1Z94133	Phylloscopus collybita	0
1067	2022-10-09	Postnuptial	Estuary	Villaviciosa estuary	Capture	1Z94134	Phylloscopus collybita	0
1068	2022-10-09	Postnuptial	Estuary	Villaviciosa estuary	Capture	1Z94130	Phylloscopus trochilus	0
1069	2022-10-09	Postnuptial	Estuary	Villaviciosa estuary	Capture	1Z94132	Phylloscopus trochilus	0
1070	2022-10-09	Postnuptial	Estuary	Villaviciosa estuary	Capture	5Y16625	Saxicola rubicola	0
1071	2022-10-09	Postnuptial	Estuary	Villaviciosa estuary	Capture	5Y16659	Saxicola rubicola	0
1072	2022-10-09	Postnuptial	Estuary	Villaviciosa estuary	Capture	B99954	Sturnus unicolor	0
1073	2022-10-09	Postnuptial	Estuary	Villaviciosa estuary	Capture	3KA81620	Sylvia atricapilla	0
1074	2022-10-09	Postnuptial	Estuary	Villaviciosa estuary	Capture	5Y16624	Sylvia melanocephala	0
1075	2022-10-16	Postnuptial	Estuary	Villaviciosa estuary	Capture	5Y16669	Acrocephalus scirpaceus	0
1076	2022-10-16	Postnuptial	Estuary	Villaviciosa estuary	Capture	5Y16676	Acrocephalus scirpaceus	0
1077	2022-10-16	Postnuptial	Estuary	Villaviciosa estuary	Control	5Y16638	Acrocephalus scirpaceus	0
1078	2022-10-16	Postnuptial	Estuary	Villaviciosa estuary	Capture	5Y16661	Anthus pratensis	0
1079	2022-10-16	Postnuptial	Estuary	Villaviciosa estuary	Capture	5Y16662	Anthus pratensis	0
1080	2022-10-16	Postnuptial	Estuary	Villaviciosa estuary	Capture	5Y16663	Anthus pratensis	0
1081	2022-10-16	Postnuptial	Estuary	Villaviciosa estuary	Capture	5Y16664	Anthus pratensis	0
1082	2022-10-16	Postnuptial	Estuary	Villaviciosa estuary	Capture	5Y16665	Anthus pratensis	1	I. ricinus	larvae	n.a.	fully feed
1083	2022-10-16	Postnuptial	Estuary	Villaviciosa estuary	Capture	5Y16666	Anthus pratensis	0
1084	2022-10-16	Postnuptial	Estuary	Villaviciosa estuary	Capture	5Y16667	Anthus pratensis	0
1085	2022-10-16	Postnuptial	Estuary	Villaviciosa estuary	Capture	5Y16668	Anthus pratensis	0
1086	2022-10-16	Postnuptial	Estuary	Villaviciosa estuary	Capture	5Y16670	Anthus pratensis	0
1087	2022-10-16	Postnuptial	Estuary	Villaviciosa estuary	Capture	5Y16671	Anthus pratensis	0
1088	2022-10-16	Postnuptial	Estuary	Villaviciosa estuary	Capture	5Y16672	Anthus pratensis	0
1089	2022-10-16	Postnuptial	Estuary	Villaviciosa estuary	Capture	5Y16673	Anthus pratensis	0
1090	2022-10-16	Postnuptial	Estuary	Villaviciosa estuary	Capture	5Y16674	Anthus pratensis	0
1091	2022-10-16	Postnuptial	Estuary	Villaviciosa estuary	Capture	5Y16675	Anthus pratensis	0
1092	2022-10-16	Postnuptial	Estuary	Villaviciosa estuary	Capture	5Y16677	Anthus pratensis	1	I. frontalis	nymph	n.a.	fully feed
1093	2022-10-16	Postnuptial	Estuary	Villaviciosa estuary	Capture	5Y16678	Anthus pratensis	0
1094	2022-10-16	Postnuptial	Estuary	Villaviciosa estuary	Capture	5Y16679	Anthus pratensis	1	I. ricinus	larvae	n.a.	fully feed
1095	2022-10-16	Postnuptial	Estuary	Villaviciosa estuary	Capture	5Y16680	Anthus pratensis	0
1096	2022-10-16	Postnuptial	Estuary	Villaviciosa estuary	Capture	5Y16681	Anthus pratensis	0
1097	2022-10-16	Postnuptial	Estuary	Villaviciosa estuary	Capture	5Y16682	Anthus pratensis	0
1098	2022-10-16	Postnuptial	Estuary	Villaviciosa estuary	Capture	5Y16683	Anthus pratensis	0
1099	2022-10-16	Postnuptial	Estuary	Villaviciosa estuary	Capture	5Y16684	Anthus pratensis	0
1100	2022-10-16	Postnuptial	Estuary	Villaviciosa estuary	Capture	5Y16685	Anthus pratensis	0
1101	2022-10-16	Postnuptial	Estuary	Villaviciosa estuary	Capture	3KA81621	Passer domesticus	0
1102	2022-10-16	Postnuptial	Estuary	Villaviciosa estuary	Capture	3KA81622	Passer domesticus	0
1103	2022-10-16	Postnuptial	Estuary	Villaviciosa estuary	Capture	3KA81623	Passer domesticus	0
1104	2022-10-16	Postnuptial	Estuary	Villaviciosa estuary	Capture	3KA81624	Passer domesticus	0
1105	2022-11-06	Wintering estuary	Estuary	Nalón estuary	Capture	5Y16733	Acrocephalus scirpaceus	0
1106	2022-11-06	Wintering estuary	Estuary	Nalón estuary	Capture	5Y16698	Carduelis carduelis	0
1107	2022-11-06	Wintering estuary	Estuary	Nalón estuary	Capture	5Y16716	Carduelis carduelis	0
1108	2022-11-06	Wintering estuary	Estuary	Nalón estuary	Capture	5Y16718	Carduelis carduelis	0
1109	2022-11-06	Wintering estuary	Estuary	Nalón estuary	Capture	5Y16719	Carduelis carduelis	0
1110	2022-11-06	Wintering estuary	Estuary	Nalón estuary	Capture	5Y16720	Carduelis carduelis	0
1111	2022-11-06	Wintering estuary	Estuary	Nalón estuary	Capture	5Y16721	Carduelis carduelis	0
1112	2022-11-06	Wintering estuary	Estuary	Nalón estuary	Capture	5Y16722	Cettia cetti	0
1113	2022-11-06	Wintering estuary	Estuary	Nalón estuary	Control	5Y16571	Cettia cetti	0
1114	2022-11-06	Wintering estuary	Estuary	Nalón estuary	Capture	5Y16686	Emberiza schoeniclus	0
1115	2022-11-06	Wintering estuary	Estuary	Nalón estuary	Capture	5Y16687	Emberiza schoeniclus	0
1116	2022-11-06	Wintering estuary	Estuary	Nalón estuary	Capture	5Y16688	Emberiza schoeniclus	0
1117	2022-11-06	Wintering estuary	Estuary	Nalón estuary	Capture	5Y16689	Emberiza schoeniclus	0
1118	2022-11-06	Wintering estuary	Estuary	Nalón estuary	Capture	5Y16690	Emberiza schoeniclus	0
1119	2022-11-06	Wintering estuary	Estuary	Nalón estuary	Capture	5Y16691	Emberiza schoeniclus	0
1120	2022-11-06	Wintering estuary	Estuary	Nalón estuary	Capture	5Y16692	Emberiza schoeniclus	0
1121	2022-11-06	Wintering estuary	Estuary	Nalón estuary	Capture	5Y16693	Emberiza schoeniclus	0
1122	2022-11-06	Wintering estuary	Estuary	Nalón estuary	Capture	5Y16694	Emberiza schoeniclus	0
1123	2022-11-06	Wintering estuary	Estuary	Nalón estuary	Capture	5Y16695	Emberiza schoeniclus	0
1124	2022-11-06	Wintering estuary	Estuary	Nalón estuary	Capture	5Y16696	Emberiza schoeniclus	0
1125	2022-11-06	Wintering estuary	Estuary	Nalón estuary	Capture	5Y16697	Emberiza schoeniclus	0
1126	2022-11-06	Wintering estuary	Estuary	Nalón estuary	Capture	5Y16699	Emberiza schoeniclus	0
1127	2022-11-06	Wintering estuary	Estuary	Nalón estuary	Capture	5Y16700	Emberiza schoeniclus	0
1128	2022-11-06	Wintering estuary	Estuary	Nalón estuary	Capture	5Y16701	Emberiza schoeniclus	0
1129	2022-11-06	Wintering estuary	Estuary	Nalón estuary	Capture	5Y16702	Emberiza schoeniclus	0
1130	2022-11-06	Wintering estuary	Estuary	Nalón estuary	Capture	5Y16703	Emberiza schoeniclus	0
1131	2022-11-06	Wintering estuary	Estuary	Nalón estuary	Capture	5Y16704	Emberiza schoeniclus	0
1132	2022-11-06	Wintering estuary	Estuary	Nalón estuary	Capture	5Y16705	Emberiza schoeniclus	0
1133	2022-11-06	Wintering estuary	Estuary	Nalón estuary	Capture	5Y16706	Emberiza schoeniclus	0
1134	2022-11-06	Wintering estuary	Estuary	Nalón estuary	Capture	5Y16707	Emberiza schoeniclus	0
1135	2022-11-06	Wintering estuary	Estuary	Nalón estuary	Capture	5Y16708	Emberiza schoeniclus	0
1136	2022-11-06	Wintering estuary	Estuary	Nalón estuary	Capture	5Y16709	Emberiza schoeniclus	0
1137	2022-11-06	Wintering estuary	Estuary	Nalón estuary	Capture	5Y16710	Emberiza schoeniclus	0
1138	2022-11-06	Wintering estuary	Estuary	Nalón estuary	Capture	5Y16711	Emberiza schoeniclus	0
1139	2022-11-06	Wintering estuary	Estuary	Nalón estuary	Capture	5Y16712	Emberiza schoeniclus	0
1140	2022-11-06	Wintering estuary	Estuary	Nalón estuary	Capture	5Y16713	Emberiza schoeniclus	0
1141	2022-11-06	Wintering estuary	Estuary	Nalón estuary	Capture	5Y16714	Emberiza schoeniclus	0
1142	2022-11-06	Wintering estuary	Estuary	Nalón estuary	Capture	5Y16715	Emberiza schoeniclus	0
1143	2022-11-06	Wintering estuary	Estuary	Nalón estuary	Capture	5Y16717	Emberiza schoeniclus	0
1144	2022-11-06	Wintering estuary	Estuary	Nalón estuary	Capture	5Y16723	Emberiza schoeniclus	0
1145	2022-11-06	Wintering estuary	Estuary	Nalón estuary	Capture	5Y16724	Emberiza schoeniclus	0
1146	2022-11-06	Wintering estuary	Estuary	Nalón estuary	Capture	5Y16725	Emberiza schoeniclus	0
1147	2022-11-06	Wintering estuary	Estuary	Nalón estuary	Capture	5Y16726	Emberiza schoeniclus	0
1148	2022-11-06	Wintering estuary	Estuary	Nalón estuary	Capture	5Y16727	Emberiza schoeniclus	0
1149	2022-11-06	Wintering estuary	Estuary	Nalón estuary	Capture	5Y16728	Emberiza schoeniclus	0
1150	2022-11-06	Wintering estuary	Estuary	Nalón estuary	Capture	5Y16729	Emberiza schoeniclus	0
1151	2022-11-06	Wintering estuary	Estuary	Nalón estuary	Capture	5Y16731	Emberiza schoeniclus	0
1152	2022-11-06	Wintering estuary	Estuary	Nalón estuary	Capture	5Y16732	Emberiza schoeniclus	0
1153	2022-11-06	Wintering estuary	Estuary	Nalón estuary	ReCapture	4Y65496	Emberiza schoeniclus	0
1154	2022-11-06	Wintering estuary	Estuary	Nalón estuary	Capture	3KA81625	Fringilla coelebs	0
1155	2022-11-06	Wintering estuary	Estuary	Nalón estuary	Capture	1Z94135	Phylloscopus collybita	0
1156	2022-11-06	Wintering estuary	Estuary	Nalón estuary	Capture	1Z94136	Phylloscopus collybita	0
1157	2022-11-06	Wintering estuary	Estuary	Nalón estuary	Capture	1Z94137	Phylloscopus collybita	0
1158	2022-11-06	Wintering estuary	Estuary	Nalón estuary	Capture	1Z94138	Phylloscopus collybita	0
1159	2022-11-06	Wintering estuary	Estuary	Nalón estuary	Capture	1Z94139	Phylloscopus collybita	0
1160	2022-11-06	Wintering estuary	Estuary	Nalón estuary	Capture	1Z94140	Phylloscopus collybita	0
1161	2022-11-06	Wintering estuary	Estuary	Nalón estuary	Capture	1Z94141	Phylloscopus collybita	0
1162	2022-11-06	Wintering estuary	Estuary	Nalón estuary	Capture	1Z94142	Phylloscopus collybita	0
1163	2022-11-06	Wintering estuary	Estuary	Nalón estuary	Capture	1Z94143	Phylloscopus collybita	0
1164	2022-11-06	Wintering estuary	Estuary	Nalón estuary	Capture	1Z94144	Phylloscopus collybita	0
1165	2022-11-06	Wintering estuary	Estuary	Nalón estuary	Capture	1Z94145	Phylloscopus collybita	0
1166	2022-11-06	Wintering estuary	Estuary	Nalón estuary	Capture	1Z94146	Phylloscopus collybita	0
1167	2022-11-06	Wintering estuary	Estuary	Nalón estuary	Capture	1Z94147	Phylloscopus collybita	0
1168	2022-11-06	Wintering estuary	Estuary	Nalón estuary	Capture	1Z94148	Phylloscopus collybita	0
1169	2022-11-06	Wintering estuary	Estuary	Nalón estuary	Capture	1Z94149	Phylloscopus collybita	0
1170	2022-11-06	Wintering estuary	Estuary	Nalón estuary	Capture	1Z94150	Phylloscopus collybita	0
1171	2022-11-06	Wintering estuary	Estuary	Nalón estuary	Capture	1Z94151	Phylloscopus collybita	1	I. frontalis	larvae	n.a.	fully feed
1172	2022-11-06	Wintering estuary	Estuary	Nalón estuary	Capture	1Z94152	Phylloscopus collybita	0
1173	2022-11-06	Wintering estuary	Estuary	Nalón estuary	Capture	1Z94153	Phylloscopus collybita	0
1174	2022-11-06	Wintering estuary	Estuary	Nalón estuary	Capture	1Z94154	Phylloscopus collybita	0
1175	2022-11-06	Wintering estuary	Estuary	Nalón estuary	Capture	1Z94155	Phylloscopus collybita	0
1176	2022-11-06	Wintering estuary	Estuary	Nalón estuary	Capture	1Z94156	Phylloscopus collybita	0
1177	2022-11-06	Wintering estuary	Estuary	Nalón estuary	Capture	1Z94157	Phylloscopus collybita	0
1178	2022-11-06	Wintering estuary	Estuary	Nalón estuary	Capture	1Z94158	Phylloscopus collybita	0
1179	2022-11-06	Wintering estuary	Estuary	Nalón estuary	Capture	1Z94159	Phylloscopus collybita	0
1180	2022-11-06	Wintering estuary	Estuary	Nalón estuary	Capture	1Z94160	Phylloscopus collybita	0
1181	2022-11-06	Wintering estuary	Estuary	Nalón estuary	Capture	1Z94161	Phylloscopus collybita	0
1182	2022-11-06	Wintering estuary	Estuary	Nalón estuary	Capture	1Z94162	Phylloscopus collybita	0
1183	2022-11-06	Wintering estuary	Estuary	Nalón estuary	Capture	1Z94163	Phylloscopus collybita	0
1184	2022-11-06	Wintering estuary	Estuary	Nalón estuary	Capture	1Z94164	Phylloscopus collybita	0
1185	2022-11-06	Wintering estuary	Estuary	Nalón estuary	Capture	1Z94165	Phylloscopus collybita	0
1186	2022-11-06	Wintering estuary	Estuary	Nalón estuary	Capture	1Z94166	Phylloscopus collybita	0
1187	2022-11-06	Wintering estuary	Estuary	Nalón estuary	Capture	1Z94167	Phylloscopus collybita	0
1188	2022-11-06	Wintering estuary	Estuary	Nalón estuary	Capture	1Z94168	Phylloscopus collybita	0
1189	2022-11-06	Wintering estuary	Estuary	Nalón estuary	Capture	1Z94169	Phylloscopus collybita	0
1190	2022-11-06	Wintering estuary	Estuary	Nalón estuary	Capture	1Z94170	Phylloscopus collybita	0
1191	2022-11-06	Wintering estuary	Estuary	Nalón estuary	Capture	1Z94171	Phylloscopus collybita	0
1192	2022-11-06	Wintering estuary	Estuary	Nalón estuary	Capture	1Z94172	Phylloscopus collybita	0
1193	2022-11-06	Wintering estuary	Estuary	Nalón estuary	Capture	1Z94173	Phylloscopus collybita	0
1194	2022-11-06	Wintering estuary	Estuary	Nalón estuary	Capture	1Z94174	Phylloscopus collybita	0
1195	2022-11-06	Wintering estuary	Estuary	Nalón estuary	Capture	1Z94175	Phylloscopus collybita	0
1196	2022-11-06	Wintering estuary	Estuary	Nalón estuary	Capture	1Z94176	Phylloscopus collybita	0
1197	2022-11-06	Wintering estuary	Estuary	Nalón estuary	Capture	1Z94177	Phylloscopus collybita	0
1198	2022-11-06	Wintering estuary	Estuary	Nalón estuary	Capture	1Z94178	Phylloscopus collybita	0
1199	2022-11-06	Wintering estuary	Estuary	Nalón estuary	Capture	1Z94179	Phylloscopus collybita	0
1200	2022-11-06	Wintering estuary	Estuary	Nalón estuary	Capture	1Z94180	Phylloscopus collybita	0
1201	2022-11-06	Wintering estuary	Estuary	Nalón estuary	Capture	1Z94181	Phylloscopus collybita	0
1202	2022-11-06	Wintering estuary	Estuary	Nalón estuary	Capture	1Z94182	Phylloscopus collybita	0
1203	2022-11-06	Wintering estuary	Estuary	Nalón estuary	Capture	1Z94183	Phylloscopus collybita	0
1204	2022-11-06	Wintering estuary	Estuary	Nalón estuary	Capture	1Z94184	Phylloscopus collybita	0
1205	2022-11-06	Wintering estuary	Estuary	Nalón estuary	Capture	1Z94185	Phylloscopus collybita	0
1206	2022-11-06	Wintering estuary	Estuary	Nalón estuary	Capture	1Z94186	Phylloscopus collybita	0
1207	2022-11-06	Wintering estuary	Estuary	Nalón estuary	Capture	1Z94187	Phylloscopus collybita	0
1208	2022-11-06	Wintering estuary	Estuary	Nalón estuary	Capture	1Z94188	Phylloscopus collybita	0
1209	2022-11-06	Wintering estuary	Estuary	Nalón estuary	Capture	1Z94189	Phylloscopus collybita	0
1210	2022-11-06	Wintering estuary	Estuary	Nalón estuary	Capture	1Z94190	Phylloscopus collybita	0
1211	2022-11-06	Wintering estuary	Estuary	Nalón estuary	Capture	1Z94191	Phylloscopus collybita	0
1212	2022-11-06	Wintering estuary	Estuary	Nalón estuary	Capture	1Z94192	Phylloscopus collybita	0
1213	2022-11-06	Wintering estuary	Estuary	Nalón estuary	Capture	1Z94193	Phylloscopus collybita	0
1214	2022-11-06	Wintering estuary	Estuary	Nalón estuary	Capture	1Z94194	Phylloscopus collybita	0
1215	2022-11-06	Wintering estuary	Estuary	Nalón estuary	Capture	1Z94195	Phylloscopus collybita	0
1216	2022-11-06	Wintering estuary	Estuary	Nalón estuary	Capture	1Z94196	Phylloscopus collybita	0
1217	2022-11-06	Wintering estuary	Estuary	Nalón estuary	Capture	1Z94197	Phylloscopus collybita	0
1218	2022-11-06	Wintering estuary	Estuary	Nalón estuary	Capture	1Z94198	Phylloscopus collybita	0
1219	2022-11-06	Wintering estuary	Estuary	Nalón estuary	Capture	1Z94199	Phylloscopus collybita	0
1220	2022-11-06	Wintering estuary	Estuary	Nalón estuary	Capture	1Z94200	Phylloscopus collybita	0
1221	2022-11-06	Wintering estuary	Estuary	Nalón estuary	Capture	not available	Phylloscopus collybita	0
1222	2022-11-06	Wintering estuary	Estuary	Nalón estuary	Capture	not available	Phylloscopus collybita	0
1223	2022-11-06	Wintering estuary	Estuary	Nalón estuary	Capture	not available	Phylloscopus collybita	0
1224	2022-11-06	Wintering estuary	Estuary	Nalón estuary	Capture	not available	Phylloscopus collybita	0
1225	2022-11-06	Wintering estuary	Estuary	Nalón estuary	Capture	not available	Phylloscopus collybita	0
1226	2022-11-06	Wintering estuary	Estuary	Nalón estuary	Capture	not available	Phylloscopus collybita	0
1227	2022-11-06	Wintering estuary	Estuary	Nalón estuary	Capture	not available	Phylloscopus collybita	0
1228	2022-11-06	Wintering estuary	Estuary	Nalón estuary	Capture	not available	Phylloscopus collybita	0
1229	2022-11-06	Wintering estuary	Estuary	Nalón estuary	Capture	not available	Phylloscopus collybita	0
1230	2022-11-06	Wintering estuary	Estuary	Nalón estuary	Capture	not available	Phylloscopus collybita	0
1231	2022-11-06	Wintering estuary	Estuary	Nalón estuary	Capture	not available	Phylloscopus collybita	0
1232	2022-11-06	Wintering estuary	Estuary	Nalón estuary	Capture	not available	Phylloscopus collybita	0
1233	2022-11-06	Wintering estuary	Estuary	Nalón estuary	Capture	not available	Phylloscopus collybita	0
1234	2022-11-06	Wintering estuary	Estuary	Nalón estuary	Capture	not available	Phylloscopus collybita	0
1235	2022-11-06	Wintering estuary	Estuary	Nalón estuary	Capture	not available	Phylloscopus collybita	0
1236	2022-11-06	Wintering estuary	Estuary	Nalón estuary	Capture	not available	Phylloscopus collybita	0
1237	2022-11-06	Wintering estuary	Estuary	Nalón estuary	Capture	not available	Phylloscopus collybita	0
1238	2022-11-06	Wintering estuary	Estuary	Nalón estuary	Capture	5Y16730	Saxicola rubicola	0
1239	2022-11-06	Wintering estuary	Estuary	Nalón estuary	Capture	3KA81626	Sylvia atricapilla	0
1240	2022-11-06	Wintering estuary	Estuary	Nalón estuary	Capture	not available	Troglodytes troglodytes	0
1241	2022-11-06	Wintering estuary	Estuary	Nalón estuary	Capture	L36470	Turdus iliacus	0
1242	2022-11-06	Wintering estuary	Estuary	Nalón estuary	Capture	B99945	Turdus merula	0
1243	2022-11-06	Wintering estuary	Estuary	Nalón estuary	Capture	L36469	Turdus philomelos	0
1244	2022-11-13	Wintering estuary	Estuary	Villaviciosa estuary	Capture	5Y16734	Anthus pratensis	0
1245	2022-11-13	Wintering estuary	Estuary	Villaviciosa estuary	Capture	5Y16735	Anthus pratensis	0
1246	2022-11-13	Wintering estuary	Estuary	Villaviciosa estuary	Capture	5Y16737	Anthus pratensis	0
1247	2022-11-13	Wintering estuary	Estuary	Villaviciosa estuary	Capture	5Y16738	Anthus pratensis	0
1248	2022-11-13	Wintering estuary	Estuary	Villaviciosa estuary	Capture	5Y16740	Anthus pratensis	0
1249	2022-11-13	Wintering estuary	Estuary	Villaviciosa estuary	Capture	5Y16742	Anthus pratensis	0
1250	2022-11-13	Wintering estuary	Estuary	Villaviciosa estuary	Capture	5Y16744	Anthus pratensis	0
1251	2022-11-13	Wintering estuary	Estuary	Villaviciosa estuary	Capture	5Y16745	Anthus pratensis	0
1252	2022-11-13	Wintering estuary	Estuary	Villaviciosa estuary	Capture	5Y16747	Anthus pratensis	0
1253	2022-11-13	Wintering estuary	Estuary	Villaviciosa estuary	Capture	5Y16748	Anthus pratensis	0
1254	2022-11-13	Wintering estuary	Estuary	Villaviciosa estuary	Capture	5Y16749	Anthus pratensis	1	I. ricinus	nymph	n.a.	fully feed
1255	2022-11-13	Wintering estuary	Estuary	Villaviciosa estuary	Capture	5Y16750	Anthus pratensis	0
1256	2022-11-13	Wintering estuary	Estuary	Villaviciosa estuary	Capture	5Y16751	Anthus pratensis	0
1257	2022-11-13	Wintering estuary	Estuary	Villaviciosa estuary	Capture	5Y16752	Anthus pratensis	0
1258	2022-11-13	Wintering estuary	Estuary	Villaviciosa estuary	Capture	5Y16753	Anthus pratensis	0
1259	2022-11-13	Wintering estuary	Estuary	Villaviciosa estuary	Capture	5Y16754	Anthus pratensis	0
1260	2022-11-13	Wintering estuary	Estuary	Villaviciosa estuary	Capture	5Y16755	Anthus pratensis	0
1261	2022-11-13	Wintering estuary	Estuary	Villaviciosa estuary	Capture	5Y16756	Anthus pratensis	0
1262	2022-11-13	Wintering estuary	Estuary	Villaviciosa estuary	Capture	5Y16757	Anthus pratensis	0
1263	2022-11-13	Wintering estuary	Estuary	Villaviciosa estuary	Capture	5Y16758	Anthus pratensis	0
1264	2022-11-13	Wintering estuary	Estuary	Villaviciosa estuary	Capture	5Y16759	Anthus pratensis	0
1265	2022-11-13	Wintering estuary	Estuary	Villaviciosa estuary	Capture	5Y16760	Anthus pratensis	0
1266	2022-11-13	Wintering estuary	Estuary	Villaviciosa estuary	Capture	5Y16761	Anthus pratensis	0
1267	2022-11-13	Wintering estuary	Estuary	Villaviciosa estuary	Capture	5Y16764	Anthus pratensis	0
1268	2022-11-13	Wintering estuary	Estuary	Villaviciosa estuary	Capture	5Y16736	Anthus spinoletta	0
1269	2022-11-13	Wintering estuary	Estuary	Villaviciosa estuary	Capture	5Y16746	Anthus spinoletta	0
1270	2022-11-13	Wintering estuary	Estuary	Villaviciosa estuary	Capture	5Y16765	Anthus spinoletta	0
1271	2022-11-13	Wintering estuary	Estuary	Villaviciosa estuary	Capture	4Z25804	Cisticola juncidis	0
1272	2022-11-13	Wintering estuary	Estuary	Villaviciosa estuary	Capture	5Y16739	Emberiza schoeniclus	0
1273	2022-11-13	Wintering estuary	Estuary	Villaviciosa estuary	Capture	5Y16741	Emberiza schoeniclus	0
1274	2022-11-13	Wintering estuary	Estuary	Villaviciosa estuary	Capture	5Y16743	Emberiza schoeniclus	0
1275	2022-11-13	Wintering estuary	Estuary	Villaviciosa estuary	Capture	5Y16762	Emberiza schoeniclus	0
1276	2022-11-13	Wintering estuary	Estuary	Villaviciosa estuary	Capture	5Y16763	Emberiza schoeniclus	0
1277	2022-11-13	Wintering estuary	Estuary	Villaviciosa estuary	Capture	4Z25900	Phylloscopus collybita	0
1278	2022-11-13	Wintering estuary	Estuary	Villaviciosa estuary	Capture	4Z25899	Phylloscopus collybita	0
1279	2022-11-13	Wintering estuary	Estuary	Villaviciosa estuary	Capture	4Z25801	Phylloscopus collybita	0
1280	2022-11-13	Wintering estuary	Estuary	Villaviciosa estuary	Capture	4Z25802	Phylloscopus collybita	0
1281	2022-11-13	Wintering estuary	Estuary	Villaviciosa estuary	Capture	4Z25805	Phylloscopus collybita	0
1282	2022-11-13	Wintering estuary	Estuary	Villaviciosa estuary	Capture	4Z25806	Phylloscopus collybita	0
1283	2022-11-13	Wintering estuary	Estuary	Villaviciosa estuary	Capture	3KA81627	Sylvia atricapilla	0
1284	2022-11-13	Wintering estuary	Estuary	Villaviciosa estuary	Capture	4Z25803	Troglodytes troglodytes	0
1285	2022-11-13	Wintering estuary	Estuary	Villaviciosa estuary	Capture	L36471	Turdus philomelos	0
1286	2022-11-26	Wintering estuary	Estuary	Nalón estuary	Control	5Y16504	Cettia cetti	0
1287	2022-11-26	Wintering estuary	Estuary	Nalón estuary	Control	5Y16525	Cettia cetti	0
1288	2022-11-26	Wintering estuary	Estuary	Nalón estuary	Control	4Y65293	Cettia cetti	0
1289	2022-11-26	Wintering estuary	Estuary	Nalón estuary	Control	5Y16568	Cettia cetti	0
1290	2022-11-26	Wintering estuary	Estuary	Nalón estuary	Capture	5Y16786	Emberiza pusilla	0
1291	2022-11-26	Wintering estuary	Estuary	Nalón estuary	Capture	5Y16766	Emberiza schoeniclus	0
1292	2022-11-26	Wintering estuary	Estuary	Nalón estuary	Capture	5Y16767	Emberiza schoeniclus	0
1293	2022-11-26	Wintering estuary	Estuary	Nalón estuary	Capture	5Y16768	Emberiza schoeniclus	0
1294	2022-11-26	Wintering estuary	Estuary	Nalón estuary	Capture	5Y16769	Emberiza schoeniclus	0
1295	2022-11-26	Wintering estuary	Estuary	Nalón estuary	Capture	5Y16770	Emberiza schoeniclus	0
1296	2022-11-26	Wintering estuary	Estuary	Nalón estuary	Capture	5Y16771	Emberiza schoeniclus	0
1297	2022-11-26	Wintering estuary	Estuary	Nalón estuary	Capture	5Y16772	Emberiza schoeniclus	0
1298	2022-11-26	Wintering estuary	Estuary	Nalón estuary	Capture	5Y16773	Emberiza schoeniclus	0
1299	2022-11-26	Wintering estuary	Estuary	Nalón estuary	Capture	5Y16774	Emberiza schoeniclus	0
1300	2022-11-26	Wintering estuary	Estuary	Nalón estuary	Capture	5Y16775	Emberiza schoeniclus	0
1301	2022-11-26	Wintering estuary	Estuary	Nalón estuary	Capture	5Y16776	Emberiza schoeniclus	0
1302	2022-11-26	Wintering estuary	Estuary	Nalón estuary	Capture	5Y16777	Emberiza schoeniclus	0
1303	2022-11-26	Wintering estuary	Estuary	Nalón estuary	Capture	5Y16778	Emberiza schoeniclus	0
1304	2022-11-26	Wintering estuary	Estuary	Nalón estuary	Capture	5Y16779	Emberiza schoeniclus	0
1305	2022-11-26	Wintering estuary	Estuary	Nalón estuary	Capture	5Y16780	Emberiza schoeniclus	0
1306	2022-11-26	Wintering estuary	Estuary	Nalón estuary	Capture	5Y16781	Emberiza schoeniclus	0
1307	2022-11-26	Wintering estuary	Estuary	Nalón estuary	Capture	5Y16782	Emberiza schoeniclus	0
1308	2022-11-26	Wintering estuary	Estuary	Nalón estuary	Capture	5Y16783	Emberiza schoeniclus	0
1309	2022-11-26	Wintering estuary	Estuary	Nalón estuary	Capture	5Y16784	Emberiza schoeniclus	0
1310	2022-11-26	Wintering estuary	Estuary	Nalón estuary	Capture	5Y16785	Emberiza schoeniclus	0
1311	2022-11-26	Wintering estuary	Estuary	Nalón estuary	Capture	5Y16787	Emberiza schoeniclus	0
1312	2022-11-26	Wintering estuary	Estuary	Nalón estuary	Capture	5Y16788	Emberiza schoeniclus	0
1313	2022-11-26	Wintering estuary	Estuary	Nalón estuary	Capture	5Y16789	Emberiza schoeniclus	0
1314	2022-11-26	Wintering estuary	Estuary	Nalón estuary	Capture	5Y16790	Emberiza schoeniclus	0
1315	2022-11-26	Wintering estuary	Estuary	Nalón estuary	Capture	5Y16791	Emberiza schoeniclus	0
1316	2022-11-26	Wintering estuary	Estuary	Nalón estuary	Capture	5Y16792	Emberiza schoeniclus	0
1317	2022-11-26	Wintering estuary	Estuary	Nalón estuary	Capture	5Y16793	Emberiza schoeniclus	0
1318	2022-11-26	Wintering estuary	Estuary	Nalón estuary	Capture	5Y16794	Emberiza schoeniclus	0
1319	2022-11-26	Wintering estuary	Estuary	Nalón estuary	Capture	5Y16795	Emberiza schoeniclus	0
1320	2022-11-26	Wintering estuary	Estuary	Nalón estuary	Capture	5Y16796	Emberiza schoeniclus	0
1321	2022-11-26	Wintering estuary	Estuary	Nalón estuary	Capture	5Y16797	Emberiza schoeniclus	0
1322	2022-11-26	Wintering estuary	Estuary	Nalón estuary	Capture	5Y16798	Emberiza schoeniclus	0
1323	2022-11-26	Wintering estuary	Estuary	Nalón estuary	Capture	5Y16799	Emberiza schoeniclus	0
1324	2022-11-26	Wintering estuary	Estuary	Nalón estuary	Capture	5Y16800	Emberiza schoeniclus	0
1325	2022-11-26	Wintering estuary	Estuary	Nalón estuary	Capture	5Y27001	Emberiza schoeniclus	0
1326	2022-11-26	Wintering estuary	Estuary	Nalón estuary	Capture	5Y27002	Emberiza schoeniclus	0
1327	2022-11-26	Wintering estuary	Estuary	Nalón estuary	Capture	5Y27003	Emberiza schoeniclus	0
1328	2022-11-26	Wintering estuary	Estuary	Nalón estuary	Capture	5Y27004	Emberiza schoeniclus	0
1329	2022-11-26	Wintering estuary	Estuary	Nalón estuary	Capture	5Y27005	Emberiza schoeniclus	0
1330	2022-11-26	Wintering estuary	Estuary	Nalón estuary	Capture	5Y27006	Emberiza schoeniclus	0
1331	2022-11-26	Wintering estuary	Estuary	Nalón estuary	Capture	5Y27007	Emberiza schoeniclus	0
1332	2022-11-26	Wintering estuary	Estuary	Nalón estuary	Capture	5Y27008	Emberiza schoeniclus	0
1333	2022-11-26	Wintering estuary	Estuary	Nalón estuary	Capture	5Y27009	Emberiza schoeniclus	0
1334	2022-11-26	Wintering estuary	Estuary	Nalón estuary	Capture	5Y27010	Emberiza schoeniclus	0
1335	2022-11-26	Wintering estuary	Estuary	Nalón estuary	Capture	5Y27011	Emberiza schoeniclus	0
1336	2022-11-26	Wintering estuary	Estuary	Nalón estuary	Capture	5Y27012	Emberiza schoeniclus	0
1337	2022-11-26	Wintering estuary	Estuary	Nalón estuary	Capture	5Y27013	Emberiza schoeniclus	0
1338	2022-11-26	Wintering estuary	Estuary	Nalón estuary	Capture	5Y27014	Emberiza schoeniclus	0
1339	2022-11-26	Wintering estuary	Estuary	Nalón estuary	Capture	5Y27015	Emberiza schoeniclus	0
1340	2022-11-26	Wintering estuary	Estuary	Nalón estuary	Capture	5Y27016	Emberiza schoeniclus	0
1341	2022-11-26	Wintering estuary	Estuary	Nalón estuary	Capture	5Y27017	Emberiza schoeniclus	0
1342	2022-11-26	Wintering estuary	Estuary	Nalón estuary	Capture	5Y27018	Emberiza schoeniclus	0
1343	2022-11-26	Wintering estuary	Estuary	Nalón estuary	Capture	5Y27019	Emberiza schoeniclus	0
1344	2022-11-26	Wintering estuary	Estuary	Nalón estuary	Capture	5Y27020	Emberiza schoeniclus	0
1345	2022-11-26	Wintering estuary	Estuary	Nalón estuary	Capture	5Y27021	Emberiza schoeniclus	0
1346	2022-11-26	Wintering estuary	Estuary	Nalón estuary	Capture	5Y27022	Emberiza schoeniclus	0
1347	2022-11-26	Wintering estuary	Estuary	Nalón estuary	Capture	5Y27023	Emberiza schoeniclus	0
1348	2022-11-26	Wintering estuary	Estuary	Nalón estuary	Capture	5Y27024	Emberiza schoeniclus	0
1349	2022-11-26	Wintering estuary	Estuary	Nalón estuary	Capture	5Y27025	Emberiza schoeniclus	0
1350	2022-11-26	Wintering estuary	Estuary	Nalón estuary	Capture	5Y27026	Emberiza schoeniclus	0
1351	2022-11-26	Wintering estuary	Estuary	Nalón estuary	Capture	5Y27027	Emberiza schoeniclus	0
1352	2022-11-26	Wintering estuary	Estuary	Nalón estuary	Capture	5Y27028	Emberiza schoeniclus	0
1353	2022-11-26	Wintering estuary	Estuary	Nalón estuary	Capture	5Y27029	Emberiza schoeniclus	0
1354	2022-11-26	Wintering estuary	Estuary	Nalón estuary	Capture	5Y27030	Emberiza schoeniclus	1	I. ricinus	adult female	n.a.	little feed
1355	2022-11-26	Wintering estuary	Estuary	Nalón estuary	Capture	5Y27031	Emberiza schoeniclus	0
1356	2022-11-26	Wintering estuary	Estuary	Nalón estuary	Capture	5Y27032	Emberiza schoeniclus	0
1357	2022-11-26	Wintering estuary	Estuary	Nalón estuary	Capture	5Y27033	Emberiza schoeniclus	0
1358	2022-11-26	Wintering estuary	Estuary	Nalón estuary	Capture	5Y27034	Emberiza schoeniclus	0
1359	2022-11-26	Wintering estuary	Estuary	Nalón estuary	Control	5Y16731	Emberiza schoeniclus	0
1360	2022-11-26	Wintering estuary	Estuary	Nalón estuary	Control	5Y16731	Emberiza schoeniclus	0
1361	2022-11-26	Wintering estuary	Estuary	Nalón estuary	Control	5Y16710	Emberiza schoeniclus	0
1362	2022-11-26	Wintering estuary	Estuary	Nalón estuary	Recovery	8984113	Emberiza schoeniclus	0
1363	2022-11-26	Wintering estuary	Estuary	Nalón estuary	Control	5Y16603	Erithacus rubecula	0
1364	2022-11-26	Wintering estuary	Estuary	Nalón estuary	Control	4Y65298	Erithacus rubecula	0
1365	2022-11-26	Wintering estuary	Estuary	Nalón estuary	Capture	4Z25808	Phylloscopus collybita	0
1366	2022-11-26	Wintering estuary	Estuary	Nalón estuary	Capture	4Z25809	Phylloscopus collybita	0
1367	2022-11-26	Wintering estuary	Estuary	Nalón estuary	Capture	4Z25810	Phylloscopus collybita	0
1368	2022-11-26	Wintering estuary	Estuary	Nalón estuary	Capture	4Z25811	Phylloscopus collybita	0
1369	2022-11-26	Wintering estuary	Estuary	Nalón estuary	Capture	4Z25812	Phylloscopus collybita	0
1370	2022-11-26	Wintering estuary	Estuary	Nalón estuary	Capture	4Z25813	Phylloscopus collybita	0
1371	2022-11-26	Wintering estuary	Estuary	Nalón estuary	Capture	4Z25814	Phylloscopus collybita	0
1372	2022-11-26	Wintering estuary	Estuary	Nalón estuary	Capture	4Z25815	Phylloscopus collybita	0
1373	2022-11-26	Wintering estuary	Estuary	Nalón estuary	Capture	4Z25816	Phylloscopus collybita	0
1374	2022-11-26	Wintering estuary	Estuary	Nalón estuary	Capture	4Z25817	Phylloscopus collybita	0
1375	2022-11-26	Wintering estuary	Estuary	Nalón estuary	Capture	4Z25818	Phylloscopus collybita	0
1376	2022-11-26	Wintering estuary	Estuary	Nalón estuary	Capture	4Z25819	Phylloscopus collybita	0
1377	2022-11-26	Wintering estuary	Estuary	Nalón estuary	Capture	4Z25820	Phylloscopus collybita	0
1378	2022-11-26	Wintering estuary	Estuary	Nalón estuary	Capture	4Z25821	Phylloscopus collybita	0
1379	2022-11-26	Wintering estuary	Estuary	Nalón estuary	Capture	4Z25822	Phylloscopus collybita	0
1380	2022-11-26	Wintering estuary	Estuary	Nalón estuary	Capture	4Z25823	Phylloscopus collybita	1	I. ricinus	larvae	n.a.	fully feed
1381	2022-11-26	Wintering estuary	Estuary	Nalón estuary	Capture	4Z25824	Phylloscopus collybita	0
1382	2022-11-26	Wintering estuary	Estuary	Nalón estuary	Capture	4Z25825	Phylloscopus collybita	0
1383	2022-11-26	Wintering estuary	Estuary	Nalón estuary	Capture	4Z25826	Phylloscopus collybita	0
1384	2022-11-26	Wintering estuary	Estuary	Nalón estuary	Capture	4Z25827	Phylloscopus collybita	1	I. frontalis	adult female	n.a.	little feed
1385	2022-11-26	Wintering estuary	Estuary	Nalón estuary	Capture	4Z25828	Phylloscopus collybita	0
1386	2022-11-26	Wintering estuary	Estuary	Nalón estuary	Capture	4Z25829	Phylloscopus collybita	0
1387	2022-11-26	Wintering estuary	Estuary	Nalón estuary	Capture	4Z25830	Phylloscopus collybita	1	I. frontalis	larvae	n.a.	fully feed
1388	2022-11-26	Wintering estuary	Estuary	Nalón estuary	Capture	4Z25831	Phylloscopus collybita	0
1389	2022-11-26	Wintering estuary	Estuary	Nalón estuary	Capture	4Z25832	Phylloscopus collybita	0
1390	2022-11-26	Wintering estuary	Estuary	Nalón estuary	Capture	4Z25833	Phylloscopus collybita	0
1391	2022-11-26	Wintering estuary	Estuary	Nalón estuary	Capture	4Z25834	Phylloscopus collybita	0
1392	2022-11-26	Wintering estuary	Estuary	Nalón estuary	Capture	4Z25835	Phylloscopus collybita	0
1393	2022-11-26	Wintering estuary	Estuary	Nalón estuary	Capture	4Z25836	Phylloscopus collybita	0
1394	2022-11-26	Wintering estuary	Estuary	Nalón estuary	Capture	4Z25837	Phylloscopus collybita	0
1395	2022-11-26	Wintering estuary	Estuary	Nalón estuary	Capture	4Z25838	Phylloscopus collybita	0
1396	2022-11-26	Wintering estuary	Estuary	Nalón estuary	Capture	4Z25839	Phylloscopus collybita	0
1397	2022-11-26	Wintering estuary	Estuary	Nalón estuary	Capture	4Z25840	Phylloscopus collybita	0
1398	2022-11-26	Wintering estuary	Estuary	Nalón estuary	Capture	4Z25841	Phylloscopus collybita	0
1399	2022-11-26	Wintering estuary	Estuary	Nalón estuary	Capture	4Z25842	Phylloscopus collybita	0
1400	2022-11-26	Wintering estuary	Estuary	Nalón estuary	Capture	4Z25843	Phylloscopus collybita	0
1401	2022-11-26	Wintering estuary	Estuary	Nalón estuary	Capture	4Z25844	Phylloscopus collybita	0
1402	2022-11-26	Wintering estuary	Estuary	Nalón estuary	Capture	4Z25845	Phylloscopus collybita	0
1403	2022-11-26	Wintering estuary	Estuary	Nalón estuary	Capture	4Z25846	Phylloscopus collybita	0
1404	2022-11-26	Wintering estuary	Estuary	Nalón estuary	Capture	4Z25807	Troglodytes troglodytes	0
1405	2022-12-01	Wintering estuary	Estuary	Villaviciosa estuary	Capture	5Y27039	Anthus pratensis	0
1406	2022-12-01	Wintering estuary	Estuary	Villaviciosa estuary	Capture	5Y27043	Anthus pratensis	0
1407	2022-12-01	Wintering estuary	Estuary	Villaviciosa estuary	Capture	5Y27046	Anthus pratensis	0
1408	2022-12-01	Wintering estuary	Estuary	Villaviciosa estuary	Capture	5Y27047	Anthus pratensis	0
1409	2022-12-01	Wintering estuary	Estuary	Villaviciosa estuary	Capture	5Y27044	Anthus spinoletta	0
1410	2022-12-01	Wintering estuary	Estuary	Villaviciosa estuary	Capture	5Y27045	Cettia cetti	0
1411	2022-12-01	Wintering estuary	Estuary	Villaviciosa estuary	Capture	5Y27042	Emberiza schoeniclus	0
1412	2022-12-01	Wintering estuary	Estuary	Villaviciosa estuary	Capture	5Y27036	Erithacus rubecula	0
1413	2022-12-01	Wintering estuary	Estuary	Villaviciosa estuary	Capture	5Y27037	Erithacus rubecula	0
1414	2022-12-01	Wintering estuary	Estuary	Villaviciosa estuary	Capture	5Y27038	Erithacus rubecula	0
1415	2022-12-01	Wintering estuary	Estuary	Villaviciosa estuary	Capture	5Y27040	Erithacus rubecula	0
1416	2022-12-01	Wintering estuary	Estuary	Villaviciosa estuary	Capture	3KA81629	Parus major	0
1417	2022-12-01	Wintering estuary	Estuary	Villaviciosa estuary	Capture	4Z25847	Phylloscopus collybita	0
1418	2022-12-01	Wintering estuary	Estuary	Villaviciosa estuary	Capture	4Z25848	Phylloscopus collybita	0
1419	2022-12-01	Wintering estuary	Estuary	Villaviciosa estuary	Capture	4Z25849	Phylloscopus collybita	0
1420	2022-12-01	Wintering estuary	Estuary	Villaviciosa estuary	Capture	4Z25850	Phylloscopus collybita	0
1421	2022-12-01	Wintering estuary	Estuary	Villaviciosa estuary	Capture	4Z25851	Phylloscopus collybita	0
1422	2022-12-01	Wintering estuary	Estuary	Villaviciosa estuary	Capture	4Z25852	Phylloscopus collybita	0
1423	2022-12-01	Wintering estuary	Estuary	Villaviciosa estuary	Capture	4Z25853	Phylloscopus collybita	0
1424	2022-12-01	Wintering estuary	Estuary	Villaviciosa estuary	Capture	4Z25854	Phylloscopus collybita	0
1425	2022-12-01	Wintering estuary	Estuary	Villaviciosa estuary	Capture	4Z25855	Phylloscopus collybita	0
1426	2022-12-01	Wintering estuary	Estuary	Villaviciosa estuary	Capture	4Z25856	Phylloscopus collybita	0
1427	2022-12-01	Wintering estuary	Estuary	Villaviciosa estuary	Capture	5Y27035	Saxicola rubicola	0
1428	2022-12-01	Wintering estuary	Estuary	Villaviciosa estuary	Capture	3KA81628	Sylvia atricapilla	0
1429	2022-12-01	Wintering estuary	Estuary	Villaviciosa estuary	Capture	3KA81630	Sylvia atricapilla	0
1430	2022-12-01	Wintering estuary	Estuary	Villaviciosa estuary	Capture	3KA81631	Sylvia atricapilla	0
1431	2022-12-01	Wintering estuary	Estuary	Villaviciosa estuary	Capture	3KA81632	Sylvia atricapilla	0
1432	2022-12-01	Wintering estuary	Estuary	Villaviciosa estuary	Capture	3KA81633	Sylvia atricapilla	0
1433	2022-12-01	Wintering estuary	Estuary	Villaviciosa estuary	Capture	3KA81634	Sylvia atricapilla	0
1434	2022-12-01	Wintering estuary	Estuary	Villaviciosa estuary	Capture	5Y27041	Sylvia melanocephala	0
1435	2022-12-01	Wintering estuary	Estuary	Villaviciosa estuary	Capture	B99946	Turdus merula	0
1436	2022-12-04	Wintering estuary	Estuary	Nalon estuary	Capture	5Y27051	Cettia cetti	0
1437	2022-12-04	Wintering estuary	Estuary	Nalon estuary	Control	4Y65445	Cettia cetti	0
1438	2022-12-04	Wintering estuary	Estuary	Nalon estuary	Control	4Y65293	Cettia cetti	0
1439	2022-12-04	Wintering estuary	Estuary	Nalon estuary	Capture	5Y27048	Emberiza schoeniclus	0
1440	2022-12-04	Wintering estuary	Estuary	Nalon estuary	Capture	5Y27049	Emberiza schoeniclus	0
1441	2022-12-04	Wintering estuary	Estuary	Nalon estuary	Capture	5Y27050	Emberiza schoeniclus	0
1442	2022-12-04	Wintering estuary	Estuary	Nalon estuary	Capture	5Y27052	Emberiza schoeniclus	0
1443	2022-12-04	Wintering estuary	Estuary	Nalon estuary	Capture	5Y27053	Emberiza schoeniclus	0
1444	2022-12-04	Wintering estuary	Estuary	Nalon estuary	Capture	5Y27054	Emberiza schoeniclus	0
1445	2022-12-04	Wintering estuary	Estuary	Nalon estuary	Capture	5Y27055	Emberiza schoeniclus	0
1446	2022-12-04	Wintering estuary	Estuary	Nalon estuary	Capture	5Y27056	Emberiza schoeniclus	0
1447	2022-12-04	Wintering estuary	Estuary	Nalon estuary	Capture	5Y27057	Emberiza schoeniclus	0
1448	2022-12-04	Wintering estuary	Estuary	Nalon estuary	Capture	5Y27058	Emberiza schoeniclus	0
1449	2022-12-04	Wintering estuary	Estuary	Nalon estuary	Capture	5Y27059	Emberiza schoeniclus	0
1450	2022-12-04	Wintering estuary	Estuary	Nalon estuary	Capture	5Y27060	Emberiza schoeniclus	0
1451	2022-12-04	Wintering estuary	Estuary	Nalon estuary	Capture	5Y27061	Emberiza schoeniclus	0
1452	2022-12-04	Wintering estuary	Estuary	Nalon estuary	Capture	5Y27062	Emberiza schoeniclus	0
1453	2022-12-04	Wintering estuary	Estuary	Nalon estuary	Control	5Y16712	Emberiza schoeniclus	0
1454	2022-12-04	Wintering estuary	Estuary	Nalon estuary	Control	5Y16798	Emberiza schoeniclus	0
1455	2022-12-04	Wintering estuary	Estuary	Nalon estuary	ReCapture	3Y73536	Emberiza schoeniclus	0
1456	2022-12-04	Wintering estuary	Estuary	Nalon estuary	Capture	4Z25857	Phylloscopus collybita	0
1457	2022-12-04	Wintering estuary	Estuary	Nalon estuary	Capture	4Z25859	Phylloscopus collybita	0
1458	2022-12-04	Wintering estuary	Estuary	Nalon estuary	Capture	4Z25860	Phylloscopus collybita	0
1459	2022-12-04	Wintering estuary	Estuary	Nalon estuary	Capture	4Z25862	Phylloscopus collybita	0
1460	2022-12-04	Wintering estuary	Estuary	Nalon estuary	Capture	4Z25863	Phylloscopus collybita	0
1461	2022-12-04	Wintering estuary	Estuary	Nalon estuary	Capture	4Z25864	Phylloscopus collybita	0
1462	2022-12-04	Wintering estuary	Estuary	Nalon estuary	Capture	4Z25865	Phylloscopus collybita	0
1463	2022-12-04	Wintering estuary	Estuary	Nalon estuary	Capture	4Z25866	Phylloscopus collybita	0
1464	2022-12-04	Wintering estuary	Estuary	Nalon estuary	Capture	3KA81635	Pyrrhula pyrrhula	0
1465	2022-12-04	Wintering estuary	Estuary	Nalon estuary	Capture	4Z25858	Troglodytes troglodytes	0
1466	2022-12-04	Wintering estuary	Estuary	Nalon estuary	Capture	4Z25861	Troglodytes troglodytes	0
1467	2022-12-04	Wintering estuary	Estuary	Nalon estuary	Capture	L36472	Turdus philomelos	0
1468	2022-12-11	Wintering estuary	Estuary	Villaviciosa estuary	Capture	5Y27064	Anthus pratensis	0
1469	2022-12-11	Wintering estuary	Estuary	Villaviciosa estuary	Capture	5Y27065	Anthus pratensis	0
1470	2022-12-11	Wintering estuary	Estuary	Villaviciosa estuary	Capture	5Y27066	Cettia cetti	1	I. frontalis	larvae	n.a.	half feed
1471	2022-12-11	Wintering estuary	Estuary	Villaviciosa estuary	Capture	5Y27068	Emberiza schoeniclus	0
1472	2022-12-11	Wintering estuary	Estuary	Villaviciosa estuary	Capture	5Y27067	Erithacus rubecula	0
1473	2022-12-11	Wintering estuary	Estuary	Villaviciosa estuary	Capture	4Z25867	Phylloscopus collybita	1	I. frontalis	larvae	n.a.	fully feed
1474	2022-12-11	Wintering estuary	Estuary	Villaviciosa estuary	Capture	4Z25868	Phylloscopus collybita	0
1475	2022-12-11	Wintering estuary	Estuary	Villaviciosa estuary	Capture	4Z25869	Phylloscopus collybita	0
1476	2022-12-11	Wintering estuary	Estuary	Villaviciosa estuary	Capture	4Z25870	Phylloscopus collybita	0
1477	2022-12-11	Wintering estuary	Estuary	Villaviciosa estuary	Capture	4Z25871	Phylloscopus collybita	0
1478	2022-12-11	Wintering estuary	Estuary	Villaviciosa estuary	Capture	4Z25872	Phylloscopus collybita	0
1479	2022-12-11	Wintering estuary	Estuary	Villaviciosa estuary	Capture	4Z25873	Phylloscopus collybita	0
1480	2022-12-11	Wintering estuary	Estuary	Villaviciosa estuary	Capture	4Z25874	Phylloscopus collybita	0
1481	2022-12-11	Wintering estuary	Estuary	Villaviciosa estuary	Capture	4Z25875	Phylloscopus collybita	0
1482	2022-12-11	Wintering estuary	Estuary	Villaviciosa estuary	Capture	4Z25876	Phylloscopus collybita	0
1483	2022-12-11	Wintering estuary	Estuary	Villaviciosa estuary	Capture	4Z25877	Phylloscopus collybita	0
1484	2022-12-11	Wintering estuary	Estuary	Villaviciosa estuary	Capture	4Z25878	Phylloscopus collybita	0
1485	2022-12-11	Wintering estuary	Estuary	Villaviciosa estuary	Capture	4Z25879	Phylloscopus collybita	0
1486	2022-12-11	Wintering estuary	Estuary	Villaviciosa estuary	Capture	4Z25880	Phylloscopus collybita	0
1487	2022-12-11	Wintering estuary	Estuary	Villaviciosa estuary	Capture	4Z25881	Phylloscopus collybita	0
1488	2022-12-11	Wintering estuary	Estuary	Villaviciosa estuary	Capture	4Z25882	Phylloscopus collybita	0
1489	2022-12-11	Wintering estuary	Estuary	Villaviciosa estuary	Capture	4Z25883	Phylloscopus collybita	0
1490	2022-12-11	Wintering estuary	Estuary	Villaviciosa estuary	Capture	4Z25884	Phylloscopus collybita	0
1491	2022-12-11	Wintering estuary	Estuary	Villaviciosa estuary	Capture	4Z25885	Phylloscopus collybita	0
1492	2022-12-11	Wintering estuary	Estuary	Villaviciosa estuary	Capture	4Z25886	Phylloscopus collybita	0
1493	2022-12-11	Wintering estuary	Estuary	Villaviciosa estuary	Capture	4Z25887	Phylloscopus collybita	0
1494	2022-12-11	Wintering estuary	Estuary	Villaviciosa estuary	Capture	4Z25888	Phylloscopus collybita	0
1495	2022-12-11	Wintering estuary	Estuary	Villaviciosa estuary	Capture	4Z25889	Phylloscopus collybita	1	I. ricinus	nymph	n.a.	half feed
1496	2022-12-11	Wintering estuary	Estuary	Villaviciosa estuary	Capture	4Z25890	Phylloscopus collybita	0
1497	2022-12-11	Wintering estuary	Estuary	Villaviciosa estuary	Capture	4Z25891	Phylloscopus collybita	0
1498	2022-12-11	Wintering estuary	Estuary	Villaviciosa estuary	Capture	4Z25892	Phylloscopus collybita	0
1499	2022-12-11	Wintering estuary	Estuary	Villaviciosa estuary	Control	4Z25856	Phylloscopus collybita	0
1500	2022-12-11	Wintering estuary	Estuary	Villaviciosa estuary	Capture	5Y27063	Saxicola rubicola	0
1501	2022-12-11	Wintering estuary	Estuary	Villaviciosa estuary	Control	5Y16592	Saxicola rubicola	0
1502	2022-12-11	Wintering estuary	Estuary	Villaviciosa estuary	Capture	3KA81636	Sylvia atricapilla	0
1503	2022-12-11	Wintering estuary	Estuary	Villaviciosa estuary	Capture	B99947	Turdus merula	1	I. ricinus	adult female	n.a.	little feed
1504	2022-12-11	Wintering estuary	Estuary	Villaviciosa estuary	Capture	L36473	Turdus philomelos	0
1505	2022-12-11	Wintering estuary	Estuary	Villaviciosa estuary	Capture	L36474	Turdus philomelos	0
1506	2022-12-11	Wintering estuary	Estuary	Villaviciosa estuary	Capture	L36475	Turdus philomelos	0
1507	2022-12-11	Wintering estuary	Estuary	Villaviciosa estuary	Capture	L36476	Turdus philomelos	0
1508	2022-12-18	Wintering estuary	Estuary	Nalon estuary	Capture	5Y27077	Anthus pratensis	0
1509	2022-12-18	Wintering estuary	Estuary	Nalon estuary	Capture	5Y27095	Cettia cetti	0
1510	2022-12-18	Wintering estuary	Estuary	Nalon estuary	Control	5Y16565	Cettia cetti	0
1511	2022-12-18	Wintering estuary	Estuary	Nalon estuary	Control	5Y16504	Cettia cetti	0
1512	2022-12-18	Wintering estuary	Estuary	Nalon estuary	Control	5Y16504	Cettia cetti	0
1513	2022-12-18	Wintering estuary	Estuary	Nalon estuary	Capture	4Z25895	Cisticola juncidis	0
1514	2022-12-18	Wintering estuary	Estuary	Nalon estuary	Capture	4Z25905	Cisticola juncidis	0
1515	2022-12-18	Wintering estuary	Estuary	Nalon estuary	Control	4Z00926	Cisticola juncidis	0
1516	2022-12-18	Wintering estuary	Estuary	Nalon estuary	Control	4Z00924	Cisticola juncidis	0
1517	2022-12-18	Wintering estuary	Estuary	Nalon estuary	Capture	5Y27087	Cyanistes caeruleus	0
1518	2022-12-18	Wintering estuary	Estuary	Nalon estuary	Capture	5Y27091	Cyanistes caeruleus	0
1519	2022-12-18	Wintering estuary	Estuary	Nalon estuary	Capture	5Y27069	Emberiza schoeniclus	0
1520	2022-12-18	Wintering estuary	Estuary	Nalon estuary	Capture	5Y27071	Emberiza schoeniclus	0
1521	2022-12-18	Wintering estuary	Estuary	Nalon estuary	Capture	5Y27072	Emberiza schoeniclus	0
1522	2022-12-18	Wintering estuary	Estuary	Nalon estuary	Capture	5Y27073	Emberiza schoeniclus	0
1523	2022-12-18	Wintering estuary	Estuary	Nalon estuary	Capture	5Y27074	Emberiza schoeniclus	0
1524	2022-12-18	Wintering estuary	Estuary	Nalon estuary	Capture	5Y27075	Emberiza schoeniclus	0
1525	2022-12-18	Wintering estuary	Estuary	Nalon estuary	Capture	5Y27076	Emberiza schoeniclus	0
1526	2022-12-18	Wintering estuary	Estuary	Nalon estuary	Capture	5Y27078	Emberiza schoeniclus	0
1527	2022-12-18	Wintering estuary	Estuary	Nalon estuary	Capture	5Y27079	Emberiza schoeniclus	0
1528	2022-12-18	Wintering estuary	Estuary	Nalon estuary	Capture	5Y27080	Emberiza schoeniclus	0
1529	2022-12-18	Wintering estuary	Estuary	Nalon estuary	Capture	5Y27081	Emberiza schoeniclus	0
1530	2022-12-18	Wintering estuary	Estuary	Nalon estuary	Capture	5Y27082	Emberiza schoeniclus	0
1531	2022-12-18	Wintering estuary	Estuary	Nalon estuary	Capture	5Y27083	Emberiza schoeniclus	0
1532	2022-12-18	Wintering estuary	Estuary	Nalon estuary	Capture	5Y27084	Emberiza schoeniclus	0
1533	2022-12-18	Wintering estuary	Estuary	Nalon estuary	Capture	5Y27085	Emberiza schoeniclus	0
1534	2022-12-18	Wintering estuary	Estuary	Nalon estuary	Capture	5Y27086	Emberiza schoeniclus	0
1535	2022-12-18	Wintering estuary	Estuary	Nalon estuary	Capture	5Y27088	Emberiza schoeniclus	0
1536	2022-12-18	Wintering estuary	Estuary	Nalon estuary	Capture	5Y27089	Emberiza schoeniclus	0
1537	2022-12-18	Wintering estuary	Estuary	Nalon estuary	Capture	5Y27090	Emberiza schoeniclus	0
1538	2022-12-18	Wintering estuary	Estuary	Nalon estuary	Capture	5Y27092	Emberiza schoeniclus	0
1539	2022-12-18	Wintering estuary	Estuary	Nalon estuary	Capture	5Y27093	Emberiza schoeniclus	0
1540	2022-12-18	Wintering estuary	Estuary	Nalon estuary	Capture	5Y27094	Emberiza schoeniclus	0
1541	2022-12-18	Wintering estuary	Estuary	Nalon estuary	Capture	5Y27096	Emberiza schoeniclus	0
1542	2022-12-18	Wintering estuary	Estuary	Nalon estuary	Capture	5Y27097	Emberiza schoeniclus	0
1543	2022-12-18	Wintering estuary	Estuary	Nalon estuary	Capture	5Y27098	Emberiza schoeniclus	0
1544	2022-12-18	Wintering estuary	Estuary	Nalon estuary	Capture	5Y27099	Emberiza schoeniclus	0
1545	2022-12-18	Wintering estuary	Estuary	Nalon estuary	Control	5Y16784	Emberiza schoeniclus	0
1546	2022-12-18	Wintering estuary	Estuary	Nalon estuary	Control	5Y16775	Emberiza schoeniclus	0
1547	2022-12-18	Wintering estuary	Estuary	Nalon estuary	Control	5Y16776	Emberiza schoeniclus	0
1548	2022-12-18	Wintering estuary	Estuary	Nalon estuary	Control	5Y27054	Emberiza schoeniclus	0
1549	2022-12-18	Wintering estuary	Estuary	Nalon estuary	Control	5Y27017	Emberiza schoeniclus	0
1550	2022-12-18	Wintering estuary	Estuary	Nalon estuary	Control	5Y27004	Emberiza schoeniclus	0
1551	2022-12-18	Wintering estuary	Estuary	Nalon estuary	Control	5Y16712	Emberiza schoeniclus	0
1552	2022-12-18	Wintering estuary	Estuary	Nalon estuary	Control	5Y27055	Emberiza schoeniclus	0
1553	2022-12-18	Wintering estuary	Estuary	Nalon estuary	ReCapture	4Y65383	Emberiza schoeniclus	0
1554	2022-12-18	Wintering estuary	Estuary	Nalon estuary	Capture	5Y27070	Erithacus rubecula	0
1555	2022-12-18	Wintering estuary	Estuary	Nalon estuary	Control	3KA81617	Parus major	0
1556	2022-12-18	Wintering estuary	Estuary	Nalon estuary	Capture	4Z25893	Phylloscopus collybita	0
1557	2022-12-18	Wintering estuary	Estuary	Nalon estuary	Capture	4Z25896	Phylloscopus collybita	0
1558	2022-12-18	Wintering estuary	Estuary	Nalon estuary	Capture	4Z25897	Phylloscopus collybita	0
1559	2022-12-18	Wintering estuary	Estuary	Nalon estuary	Capture	4Z25898	Phylloscopus collybita	0
1560	2022-12-18	Wintering estuary	Estuary	Nalon estuary	Capture	4Z25901	Phylloscopus collybita	0
1561	2022-12-18	Wintering estuary	Estuary	Nalon estuary	Capture	4Z25902	Phylloscopus collybita	0
1562	2022-12-18	Wintering estuary	Estuary	Nalon estuary	Capture	4Z25903	Phylloscopus collybita	0
1563	2022-12-18	Wintering estuary	Estuary	Nalon estuary	Capture	4Z25904	Phylloscopus collybita	0
1564	2022-12-18	Wintering estuary	Estuary	Nalon estuary	Capture	4Z25906	Phylloscopus collybita	0
1565	2022-12-18	Wintering estuary	Estuary	Nalon estuary	Capture	3KA81637	Prunella modularis	0
1566	2022-12-18	Wintering estuary	Estuary	Nalon estuary	Capture	4Z25894	Troglodytes troglodytes	0
1567	2022-12-18	Wintering estuary	Estuary	Nalon estuary	Control	4Z25861	Troglodytes troglodytes	0
1568	2022-12-18	Wintering estuary	Estuary	Nalon estuary	Control	4Z00974	Troglodytes troglodytes	0
1569	2022-12-26	Wintering estuary	Estuary	Villaviciosa estuary	Capture	5Y27100	Anthus spinoletta	0
1570	2022-12-26	Wintering estuary	Estuary	Villaviciosa estuary	Capture	5Y25801	Anthus spinoletta	0
1571	2022-12-26	Wintering estuary	Estuary	Villaviciosa estuary	Capture	4Z25907	Cisticola juncidis	0
1572	2022-12-26	Wintering estuary	Estuary	Villaviciosa estuary	Capture	4Z25909	Cisticola juncidis	0
1573	2022-12-26	Wintering estuary	Estuary	Villaviciosa estuary	Capture	4Z25908	Phylloscopus collybita	0
1574	2022-12-26	Wintering estuary	Estuary	Villaviciosa estuary	Control	3Y04458	Sylvia melanocephala	0
1575	2023-01-22	Wintering estuary	Estuary	Nalon estuary	Capture	5Y25806	Anthus pratensis	0
1576	2023-01-22	Wintering estuary	Estuary	Nalon estuary	Control	5Y16565	Cettia cetti	0
1577	2023-01-22	Wintering estuary	Estuary	Nalon estuary	Capture	5Y25802	Emberiza schoeniclus	0
1578	2023-01-22	Wintering estuary	Estuary	Nalon estuary	Capture	5Y25803	Emberiza schoeniclus	0
1579	2023-01-22	Wintering estuary	Estuary	Nalon estuary	Capture	5Y25804	Emberiza schoeniclus	0
1580	2023-01-22	Wintering estuary	Estuary	Nalon estuary	Capture	5Y25805	Emberiza schoeniclus	0
1581	2023-01-22	Wintering estuary	Estuary	Nalon estuary	Capture	5Y25807	Emberiza schoeniclus	0
1582	2023-01-22	Wintering estuary	Estuary	Nalon estuary	Capture	5Y25808	Emberiza schoeniclus	0
1583	2023-01-22	Wintering estuary	Estuary	Nalon estuary	Capture	5Y25809	Emberiza schoeniclus	0
1584	2023-01-22	Wintering estuary	Estuary	Nalon estuary	Capture	5Y25810	Emberiza schoeniclus	0
1585	2023-01-22	Wintering estuary	Estuary	Nalon estuary	Control	5Y16701	Emberiza schoeniclus	0
1586	2023-01-22	Wintering estuary	Estuary	Nalon estuary	ReCapture	4Y65397	Emberiza schoeniclus	0
1587	2023-01-22	Wintering estuary	Estuary	Nalon estuary	Control	5Y27070	Erithacus rubecula	0
1588	2023-01-22	Wintering estuary	Estuary	Nalon estuary	ReCapture	4Y65298	Erithacus rubecula	0
1589	2023-01-22	Wintering estuary	Estuary	Nalon estuary	Capture	4Z25910	Phylloscopus collybita	0
1590	2023-01-22	Wintering estuary	Estuary	Nalon estuary	Capture	4Z25911	Phylloscopus collybita	0
1591	2023-01-22	Wintering estuary	Estuary	Nalon estuary	Control	4Z25861	Troglodytes troglodytes	0
1592	2023-01-31	Wintering estuary	Estuary	Nalon estuary	Capture	5Y16504	Cettia cetti	0
1593	2023-01-31	Wintering estuary	Estuary	Nalon estuary	Control	5Y27022	Cettia cetti	0
1594	2023-01-31	Wintering estuary	Estuary	Nalon estuary	Control	5Y27022	Emberiza schoeniclus	0
1595	2023-01-31	Wintering estuary	Estuary	Nalon estuary	Control	5Y27054	Emberiza schoeniclus	0
1596	2023-01-31	Wintering estuary	Estuary	Nalon estuary	Control	5Y27030	Emberiza schoeniclus	0
1597	2023-01-31	Wintering estuary	Estuary	Nalon estuary	Control	5Y16603	Erithacus rubecula	0
1598	2023-01-31	Wintering estuary	Estuary	Nalon estuary	Capture	3KA81641	Pyrrhula pyrrhula	0
1599	2023-01-31	Wintering estuary	Estuary	Nalon estuary	Capture	3KA81640	Sylvia atricapilla	0
1600	2023-01-31	Wintering estuary	Estuary	Nalon estuary	Capture	4Z25894	Troglodytes troglodytes	0
1601	2023-02-12	Forest birds	Forest	Nava (Piloñeta)	Capture	4Z25916	Aegithalos caudatus	0
1602	2023-02-12	Forest birds	Forest	Nava (Piloñeta)	Capture	4Z25912	Certhia brachydactyla	0
1603	2023-02-12	Forest birds	Forest	Nava (Piloñeta)	Capture	4Z25913	Certhia brachydactyla	0
1604	2023-02-12	Forest birds	Forest	Nava (Piloñeta)	Capture	5Y25813	Cyanistes caeruleus	0
1605	2023-02-12	Forest birds	Forest	Nava (Piloñeta)	Capture	5Y25811	Lophophanes cristatus	0
1606	2023-02-12	Forest birds	Forest	Nava (Piloñeta)	Capture	5Y25812	Lophophanes cristatus	1	I. ricinus	nymph	ear	half feed
1607	2023-02-12	Forest birds	Forest	Nava (Piloñeta)	Capture	4Z25914	Periparus ater	0
1608	2023-02-12	Forest birds	Forest	Nava (Piloñeta)	Capture	4Z25915	Regulus ignicapilla	0
1609	2023-02-12	Forest birds	Forest	Nava (Piloñeta)	Capture	4Z25917	Regulus ignicapilla	0
1610	2023-02-19	Forest birds	Forest	Nava (Praeres)	Capture	4Z25919	Certhia brachydactyla	0
1611	2023-02-19	Forest birds	Forest	Nava (Praeres)	Capture	4Z25920	Certhia brachydactyla	1	I. ricinus	larvae	beak	fully feed
1612	2023-02-19	Forest birds	Forest	Nava (Praeres)	Capture	4Z25923	Certhia brachydactyla	0
1613	2023-02-19	Forest birds	Forest	Nava (Praeres)	Capture	4Z25924	Certhia brachydactyla	0
1614	2023-02-19	Forest birds	Forest	Nava (Praeres)	Capture	4Z25925	Certhia brachydactyla	0
1615	2023-02-19	Forest birds	Forest	Nava (Praeres)	Capture	3KA81642	Parus major	0
1616	2023-02-19	Forest birds	Forest	Nava (Praeres)	Capture	3KA81643	Parus major	0
1617	2023-02-19	Forest birds	Forest	Nava (Praeres)	Capture	4Z25918	Regulus ignicapilla	0
1618	2023-02-19	Forest birds	Forest	Nava (Praeres)	Capture	4Z25921	Regulus ignicapilla	0
1619	2023-02-19	Forest birds	Forest	Nava (Praeres)	Capture	4Z25922	Regulus ignicapilla	0
1620	2023-02-19	Forest birds	Forest	Nava (Praeres)	Capture	B94127	Turdus merula	0
1621	2023-03-12	Forest birds	Forest	Nava (Praeres)	Capture	4Z25929	Certhia brachydactyla	0
1622	2023-03-12	Forest birds	Forest	Nava (Praeres)	Capture	5Y25815	Cyanistes caeruleus	0
1623	2023-03-12	Forest birds	Forest	Nava (Praeres)	Capture	5Y25816	Cyanistes caeruleus	0
1624	2023-03-12	Forest birds	Forest	Nava (Praeres)	Capture	5Y25814	Erithacus rubecula	0
1625	2023-03-12	Forest birds	Forest	Nava (Praeres)	Capture	3KA81644	Parus major	0
1626	2023-03-12	Forest birds	Forest	Nava (Praeres)	Capture	3KA81645	Parus major	0
1627	2023-03-12	Forest birds	Forest	Nava (Praeres)	Capture	3KA81646	Parus major	0
1628	2023-03-12	Forest birds	Forest	Nava (Praeres)	Capture	3KA81647	Parus major	0
1629	2023-03-12	Forest birds	Forest	Nava (Praeres)	Capture	5Y25817	Poecile palustris	0
1630	2023-03-12	Forest birds	Forest	Nava (Praeres)	Capture	5Y25818	Poecile palustris	0
1631	2023-03-12	Forest birds	Forest	Nava (Praeres)	Capture	5Y25819	Poecile palustris	0
1632	2023-03-12	Forest birds	Forest	Nava (Praeres)	Capture	4Z25926	Regulus ignicapilla	0
1633	2023-03-12	Forest birds	Forest	Nava (Praeres)	Capture	4Z25927	Regulus ignicapilla	0
1634	2023-03-12	Forest birds	Forest	Nava (Praeres)	Capture	4Z25928	Regulus ignicapilla	0
1635	2023-03-12	Forest birds	Forest	Nava (Praeres)	ReCapture	3Z00997	Regulus ignicapilla	0
1636	2023-03-12	Forest birds	Forest	Nava (Praeres)	Capture	B99955	Turdus merula	2	I. ricinus	nymph	beak	half feed
1637	2023-03-16	Forest birds	Forest	Piloña (Pesanca)	Capture	5Y25820	Poecile palustris	0
1638	2023-03-16	Forest birds	Forest	Piloña (Pesanca)	Capture	5Y25821	Poecile palustris	0
1639	2023-03-19	Forest birds	Forest	Nava (Praeres)	ReCapture	1Z99326	Certhia brachydactyla	0
1640	2023-03-19	Forest birds	Forest	Nava (Praeres)	Capture	3KA81649	Fringilla coelebs	0
1641	2023-03-19	Forest birds	Forest	Nava (Praeres)	Capture	3KA81648	Parus major	0
1642	2023-03-19	Forest birds	Forest	Nava (Praeres)	Capture	4Z25932	Periparus ater	0
1643	2023-03-19	Forest birds	Forest	Nava (Praeres)	Capture	4Z25934	Periparus ater	0
1644	2023-03-19	Forest birds	Forest	Nava (Praeres)	ReCapture	1Z99325	Periparus ater	0
1645	2023-03-19	Forest birds	Forest	Nava (Praeres)	Capture	5Y25822	Poecile palustris	0
1646	2023-03-19	Forest birds	Forest	Nava (Praeres)	Capture	5Y25823	Poecile palustris	0
1647	2023-03-19	Forest birds	Forest	Nava (Praeres)	Capture	5Y25824	Poecile palustris	0
1648	2023-03-19	Forest birds	Forest	Nava (Praeres)	Capture	5Y25825	Poecile palustris	0
1649	2023-03-19	Forest birds	Forest	Nava (Praeres)	Capture	4Z25933	Regulus ignicapilla	0
1650	2023-03-19	Forest birds	Forest	Nava (Praeres)	Capture	4Z25930	Regulus ignicapilla	0
1651	2023-03-19	Forest birds	Forest	Nava (Praeres)	Capture	4Z25931	Regulus ignicapilla	0
1652	2023-03-26	Forest birds	Forest	Piloña (Pesanca)	Capture	4Z25941	Aegithalos caudatus	0
1653	2023-03-26	Forest birds	Forest	Piloña (Pesanca)	Capture	5Y25835	Erithacus rubecula	0
1654	2023-03-26	Forest birds	Forest	Piloña (Pesanca)	Capture	5Y25826	Cyanistes caeruleus	0
1655	2023-03-26	Forest birds	Forest	Piloña (Pesanca)	Capture	5Y25827	Cyanistes caeruleus	0
1656	2023-03-26	Forest birds	Forest	Piloña (Pesanca)	Capture	5Y25828	Cyanistes caeruleus	0
1657	2023-03-26	Forest birds	Forest	Piloña (Pesanca)	Capture	4Z25936	Certhia brachydactyla	0
1658	2023-03-26	Forest birds	Forest	Piloña (Pesanca)	Capture	4Z25939	Certhia brachydactyla	0
1659	2023-03-26	Forest birds	Forest	Piloña (Pesanca)	Capture	5Y25830	Lophophanes cristatus	2	I. ricinus	larvae	eyelid	half feed
1660	2023-03-26	Forest birds	Forest	Piloña (Pesanca)	Capture	4Z25935	Periparus ater	0
1661	2023-03-26	Forest birds	Forest	Piloña (Pesanca)	Capture	4Z25937	Periparus ater	0
1662	2023-03-26	Forest birds	Forest	Piloña (Pesanca)	Capture	4Z25942	Periparus ater	0
1663	2023-03-26	Forest birds	Forest	Piloña (Pesanca)	Capture	5Y25829	Poecile palustris	0
1664	2023-03-26	Forest birds	Forest	Piloña (Pesanca)	Capture	5Y25831	Poecile palustris	0
1665	2023-03-26	Forest birds	Forest	Piloña (Pesanca)	Capture	5Y25832	Poecile palustris	0
1666	2023-03-26	Forest birds	Forest	Piloña (Pesanca)	Capture	5Y25833	Poecile palustris	0
1667	2023-03-26	Forest birds	Forest	Piloña (Pesanca)	Capture	5Y25834	Poecile palustris	0
1668	2023-03-26	Forest birds	Forest	Piloña (Pesanca)	Capture	4Z25938	Regulus ignicapilla	0
1669	2023-03-26	Forest birds	Forest	Piloña (Pesanca)	Capture	4Z25940	Regulus ignicapilla	0
1670	2023-03-26	Forest birds	Forest	Piloña (Pesanca)	Capture	4Z25943	Regulus ignicapilla	0
1671	2023-03-26	Forest birds	Forest	Piloña (Pesanca)	Capture	4Z25944	Regulus ignicapilla	0
1672	2023-04-02	Forest birds	Forest	Nava (Praeres)	Captura	4Z25945	Regulus ignicapilla	0
1673	2023-04-02	Forest birds	Forest	Nava (Praeres)	Captura	4Z25946	Regulus ignicapilla	0
1674	2023-04-02	Forest birds	Forest	Nava (Praeres)	Control	4Z25920	Certhia brachydactyla	0
1675	2023-04-02	Forest birds	Forest	Nava (Praeres)	Captura	5Y25836	Erithacus rubecula	0
1676	2023-04-02	Forest birds	Forest	Nava (Praeres)	Captura	5Y25837	Cyanistes caeruleus	0
1677	2023-04-02	Forest birds	Forest	Nava (Praeres)	Captura	5Y25838	Poecile palustris	0
1678	2023-04-02	Forest birds	Forest	Nava (Praeres)	Captura	4Z25947	Phylloscopus ibericus	0
1679	2023-04-02	Forest birds	Forest	Nava (Praeres)	Captura	3KA81652	Sylvia atricapilla	1	I. frontalis	nymph	eyelid	half feed
1680	2023-04-02	Forest birds	Forest	Nava (Praeres)	Captura	4Z25948	Periparus ater	0
1681	2023-04-02	Forest birds	Forest	Nava (Praeres)	Captura	3KA81650	Pyrrhula pyrrhula	0
1682	2023-04-02	Forest birds	Forest	Nava (Praeres)	Captura	5Y25839	Cyanistes caeruleus	0
1683	2023-04-02	Forest birds	Forest	Nava (Praeres)	Captura	5Y25840	Cyanistes caeruleus	0
1684	2023-04-02	Forest birds	Forest	Nava (Praeres)	Captura	5Y25841	Lophophanes cristatus	0
1685	2023-04-02	Forest birds	Forest	Nava (Praeres)	Captura	3KA81651	Fringilla coelebs	0
1686	2023-04-02	Forest birds	Forest	Nava (Praeres)	Captura	B99950	Dendrocopos major	0
1687	2023-04-07	Forest birds	Forest	Nava (Fuensanta)	Captura	4Z25949	Certhia brachydactyla	0
1688	2023-04-07	Forest birds	Forest	Nava (Fuensanta)	Captura	4Z25950	Regulus ignicapilla	0
1689	2023-04-07	Forest birds	Forest	Nava (Fuensanta)	Captura	4Z25951	Regulus ignicapilla	0
1690	2023-04-07	Forest birds	Forest	Nava (Fuensanta)	ReCapture	4Z00915	Certhia brachydactyla	0
1691	2023-04-07	Forest birds	Forest	Nava (Fuensanta)	Captura	4Z25952	Periparus ater	0
1692	2023-04-07	Forest birds	Forest	Nava (Fuensanta)	ReCaptura	4Z25953	Aegithalos caudatus	1	I. ricinus	larvae	ear	fully feed
1693	2023-04-07	Forest birds	Forest	Nava (Fuensanta)	Captura	4Z00916	Certhia brachydactyla	0
1694	2023-04-07	Forest birds	Forest	Nava (Fuensanta)	Captura	4Z25954	Aegithalos caudatus	0
1695	2023-04-07	Forest birds	Forest	Nava (Fuensanta)	Captura	BC00211	Garrulus Glandarius	0
1696	2023-04-07	Forest birds	Forest	Nava (Fuensanta)	Captura	BC00212	Garrulus Glandarius	0
1697	2023-04-07	Forest birds	Forest	Nava (Fuensanta)	Captura	4Z25955	Periparus ater	0
1698	2023-04-07	Forest birds	Forest	Nava (Fuensanta)	Captura	4Z25956	Periparus ater	0
